# Supplementary material for: Lignanamides from the Roots of Metternichia macrocalyx and Their Anti-inflammatory Activity
Source: PubMed Central journal article supplement (PMC11603264; doi:10.1021/acsomega.4c07336), 2024-11-13
Supplement: ao4c07336_si_001.pdf [file ao4c07336_si_001.pdf]

## SUPPORTING INFORMATION

### **Lignanamides from the roots of *Metternichia macrocalyx* and their anti-inflammatory activity**

Thiago A. M. Brito, Ana C. F. de Albuquerque, Fernando M. dos Santos Junior, Paulo B. A. Loureiro, Francisco A. A. F. Gadelha, Marianna V. Sobral, Domingos B. O. S. Cardoso, Eudes da Silva Velozo, Josean F. Tavares, Lucas S. Abreu, Marcelo S. da Silva.

#### **Table of Contents**

|    |                                                                          |    |
|----|--------------------------------------------------------------------------|----|
| 1  | Spectroscopic data for compound <b>1</b> .....                           | 1  |
| 2  | Spectroscopic data for compound <b>2</b> .....                           | 7  |
| 3  | Spectroscopic data for Compound <b>3</b> .....                           | 12 |
| 4  | Spectroscopic data for Compound <b>4</b> .....                           | 18 |
| 5  | Spectroscopic data for compound <b>5</b> .....                           | 23 |
| 6  | Spectroscopic data for compound <b>6</b> .....                           | 28 |
| 7  | Spectroscopic data for compound <b>7</b> .....                           | 31 |
| 8  | Spectroscopic data for compound <b>8</b> .....                           | 33 |
| 9  | Spectroscopic data for compound <b>9</b> .....                           | 36 |
| 10 | Spectroscopic data for compound <b>10</b> .....                          | 39 |
| 11 | Spectroscopic data for compounds <b>11,12</b> .....                      | 42 |
| 12 | Spectroscopic data for compounds <b>13,14</b> .....                      | 45 |
| 13 | Spectroscopic data for compound <b>15</b> .....                          | 50 |
| 14 | Quantum mechanical calculations for compound <b>1</b> . .....            | 53 |
| 15 | NMR calculation data for compound <b>1</b> . .....                       | 54 |
| 16 | NMR calculation data for compound <b>2</b> . .....                       | 57 |
| 17 | NMR calculation data for compound <b>3</b> . .....                       | 60 |
| 18 | NMR calculation data for compound <b>4</b> . .....                       | 62 |
| 19 | NMR calculation data for compound <b>5</b> . .....                       | 65 |
| 20 | Monte Carlo/MMFF force field calculations and Boltzmann population. .... | 67 |

# 1 Spectroscopic data for compound 1

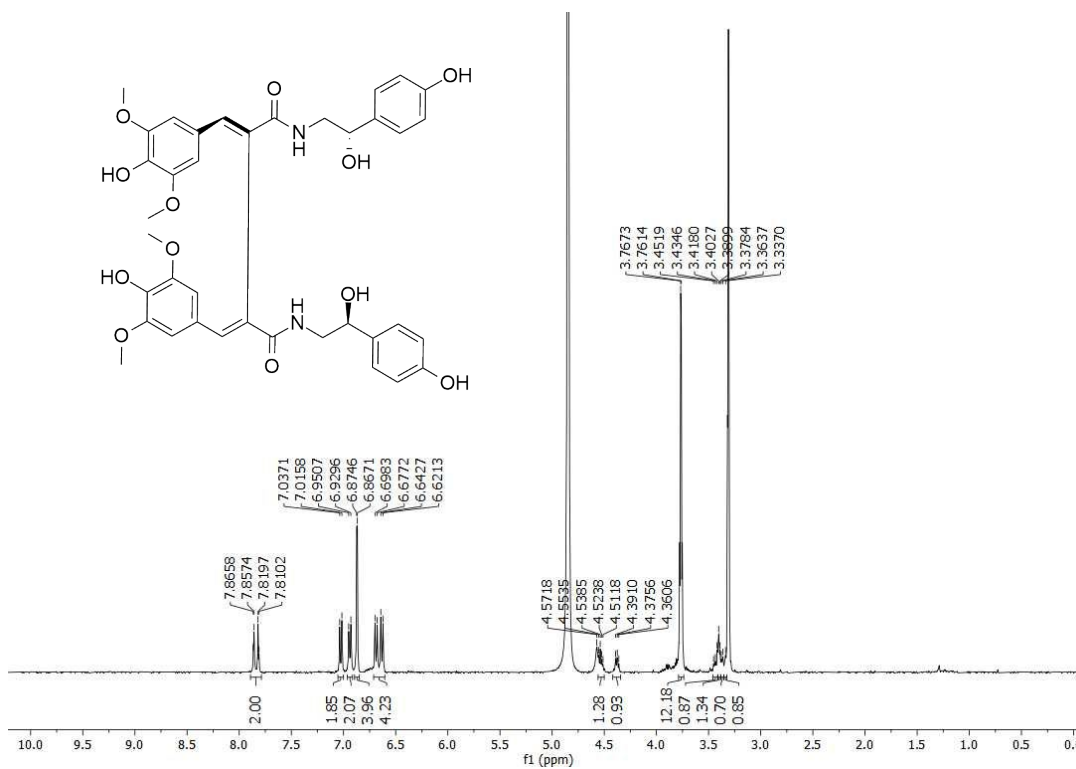

**Figure S1.**  $^1\text{H}$  NMR spectrum of compound 1 (400 MHz, MeOD).

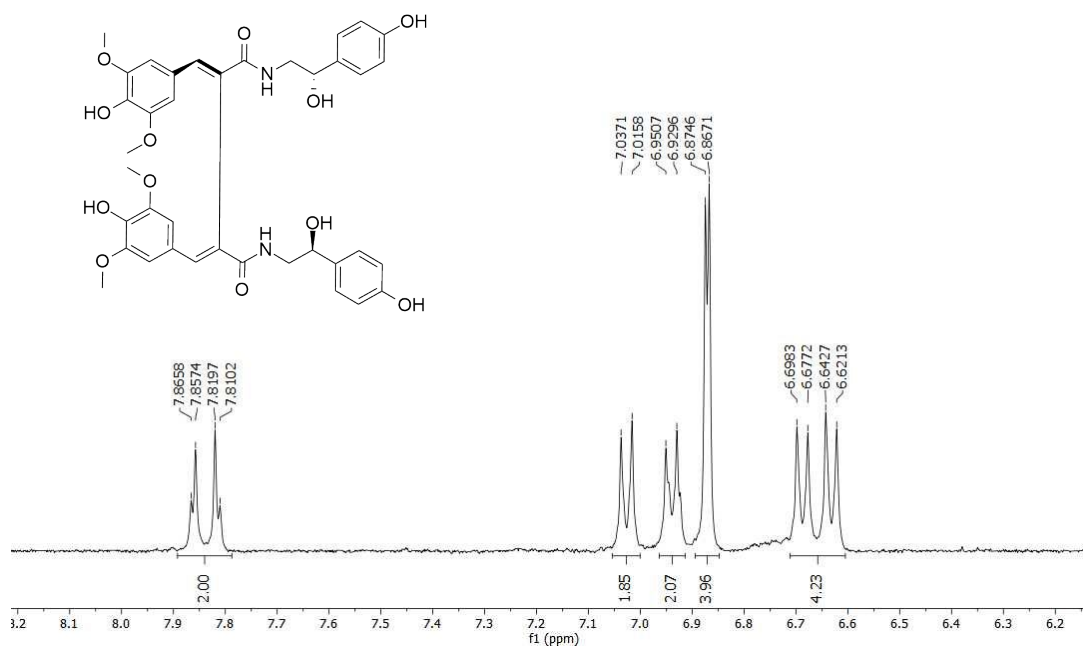

**Figure S2.** Amplification of the  $^1\text{H}$  NMR spectrum of compound 1 (400 MHz, MeOD).

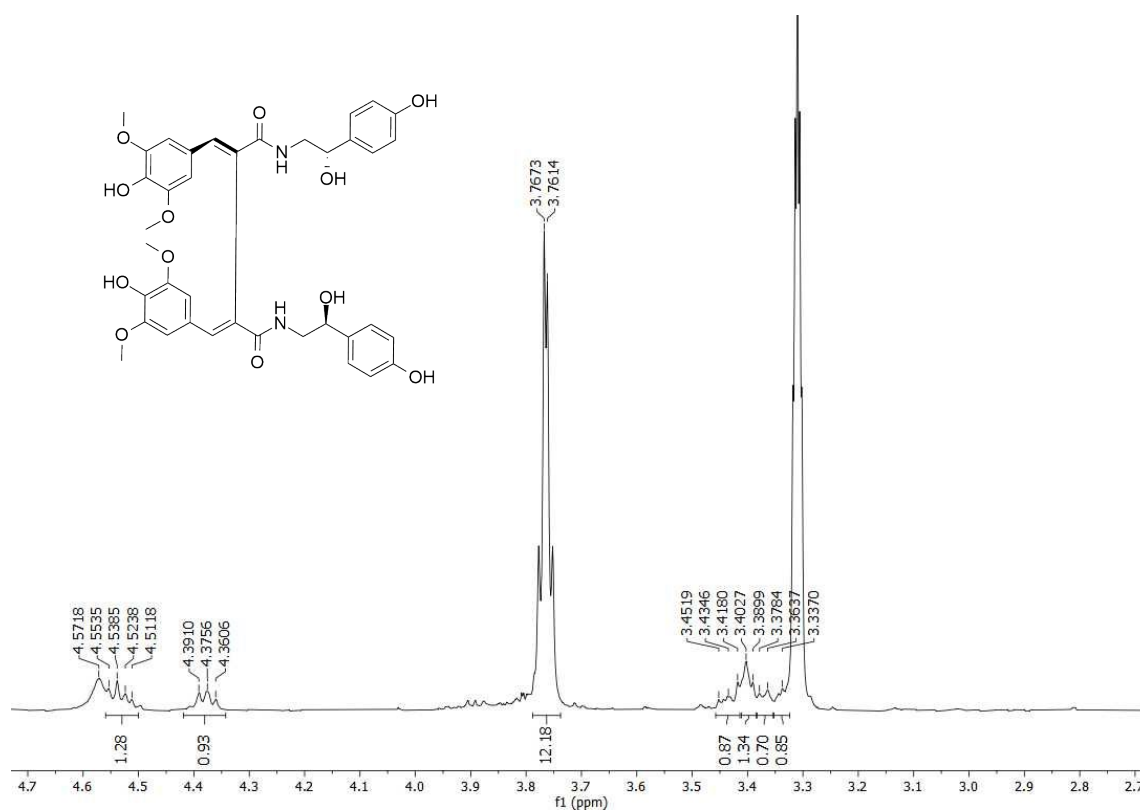

**Figure S3.** Amplification of the <sup>1</sup>H NMR spectrum of compound 1 (400 MHz, MeOD).

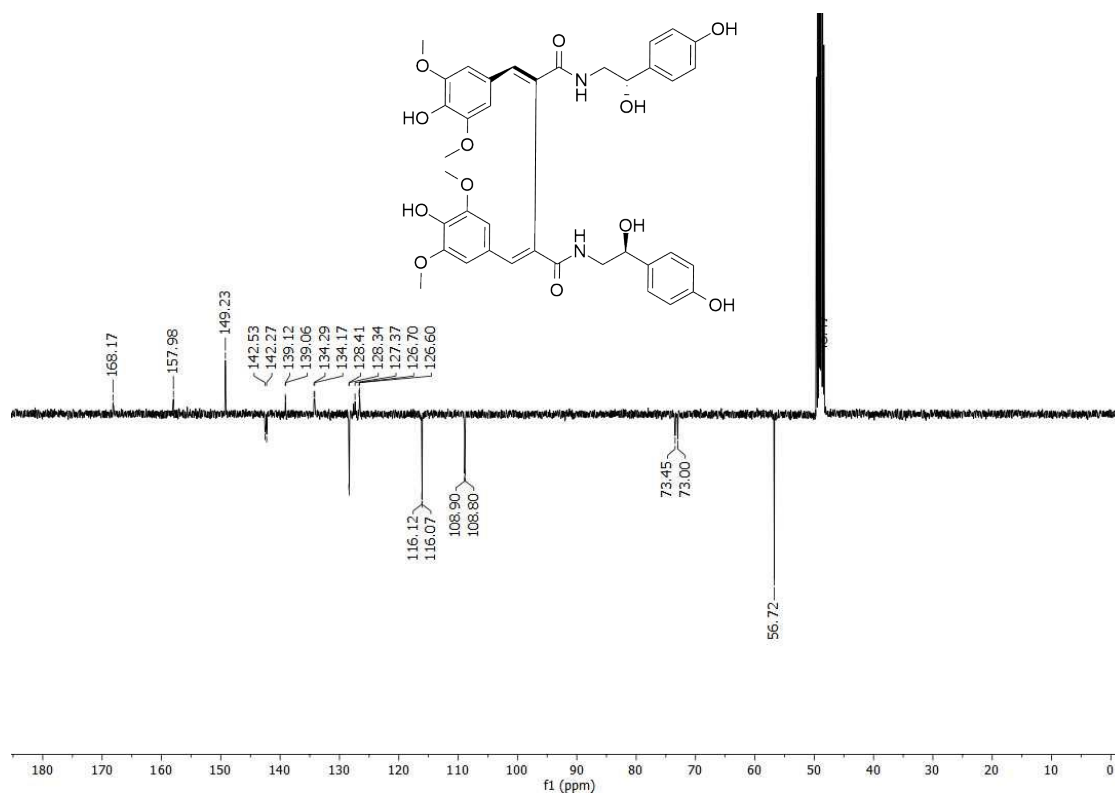

**Figure S4.** <sup>13</sup>C-APT NMR spectrum of compound 1 (100 MHz, MeOD).

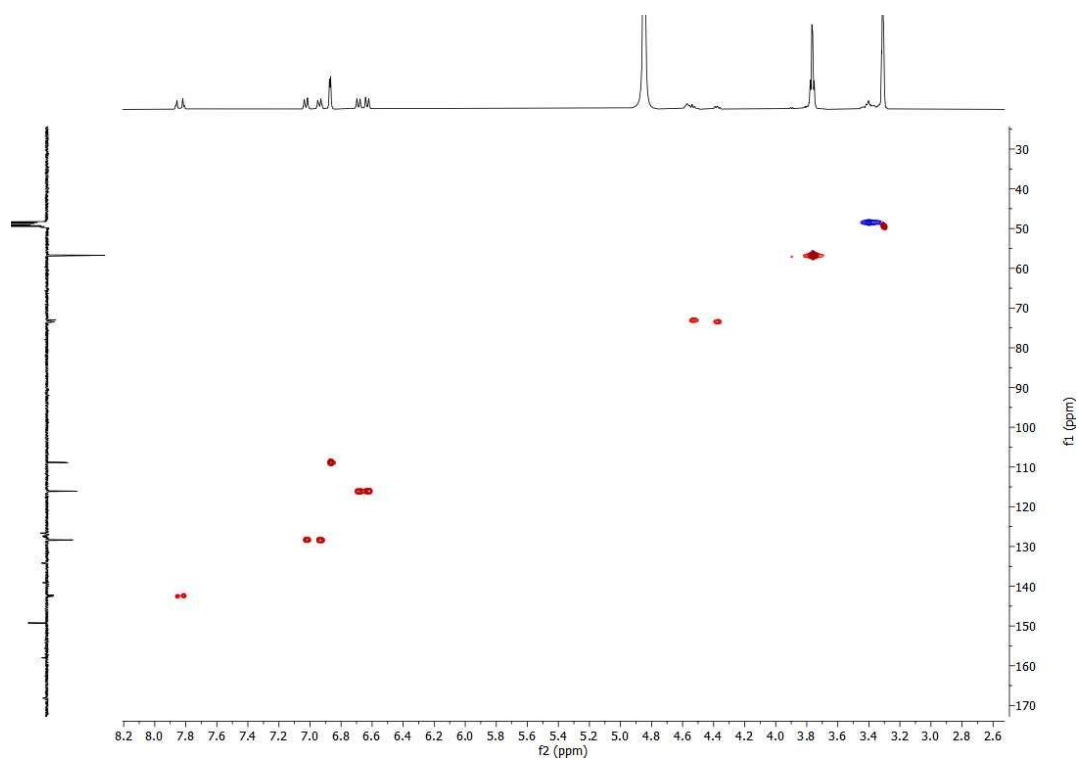

**Figure S5.** HSQC spectrum of compound **1** (400/100 MHz, MeOD).

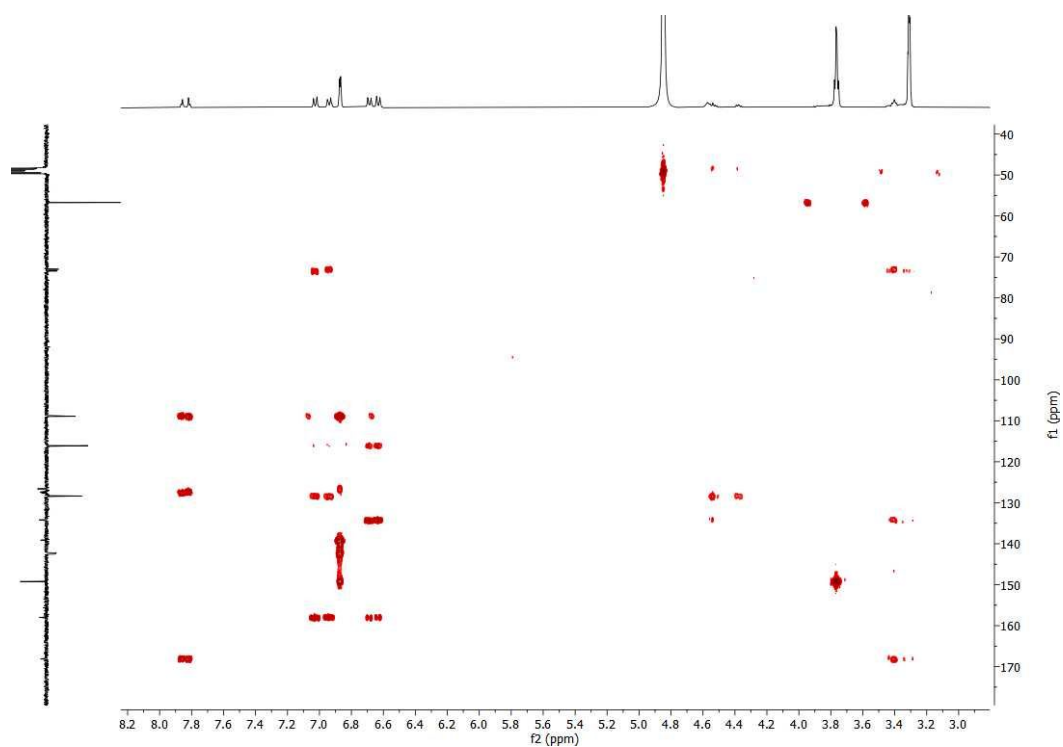

**Figure S6.** HMBC spectrum of compound **1** (400/100 MHz, MeOD).

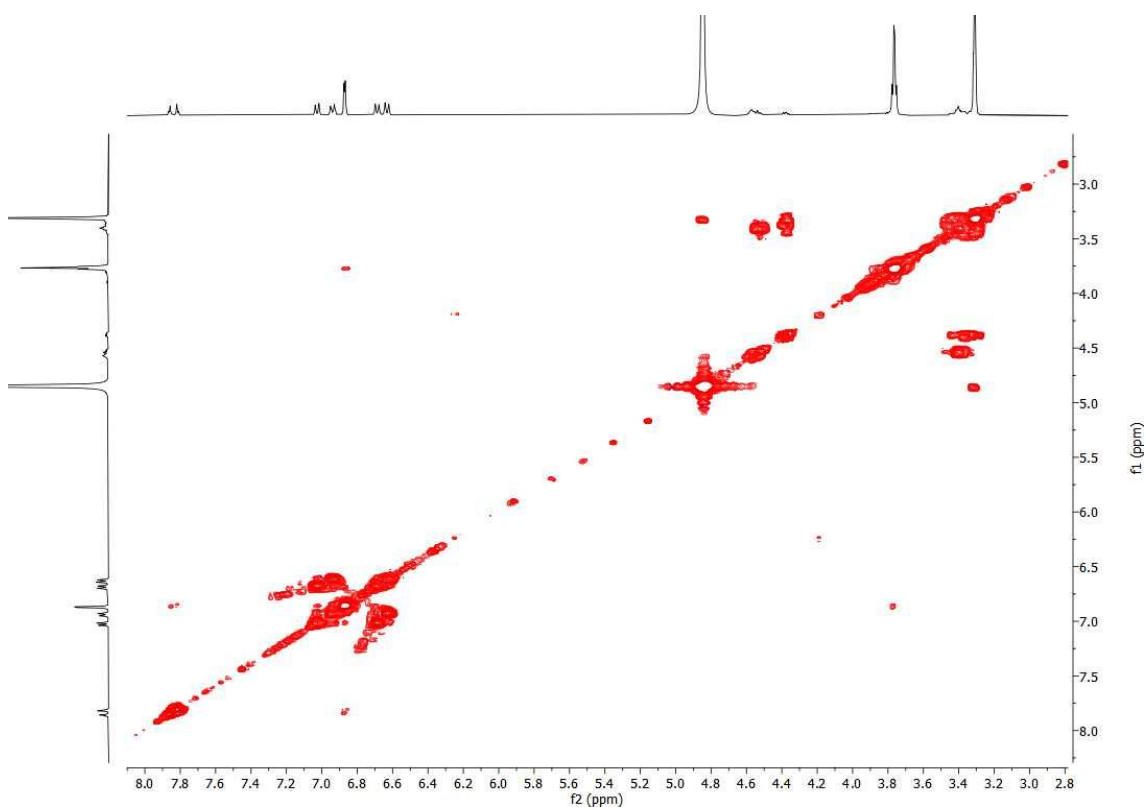

**Figure S7.** COSY spectrum of compound **1** (400 MHz, MeOD).

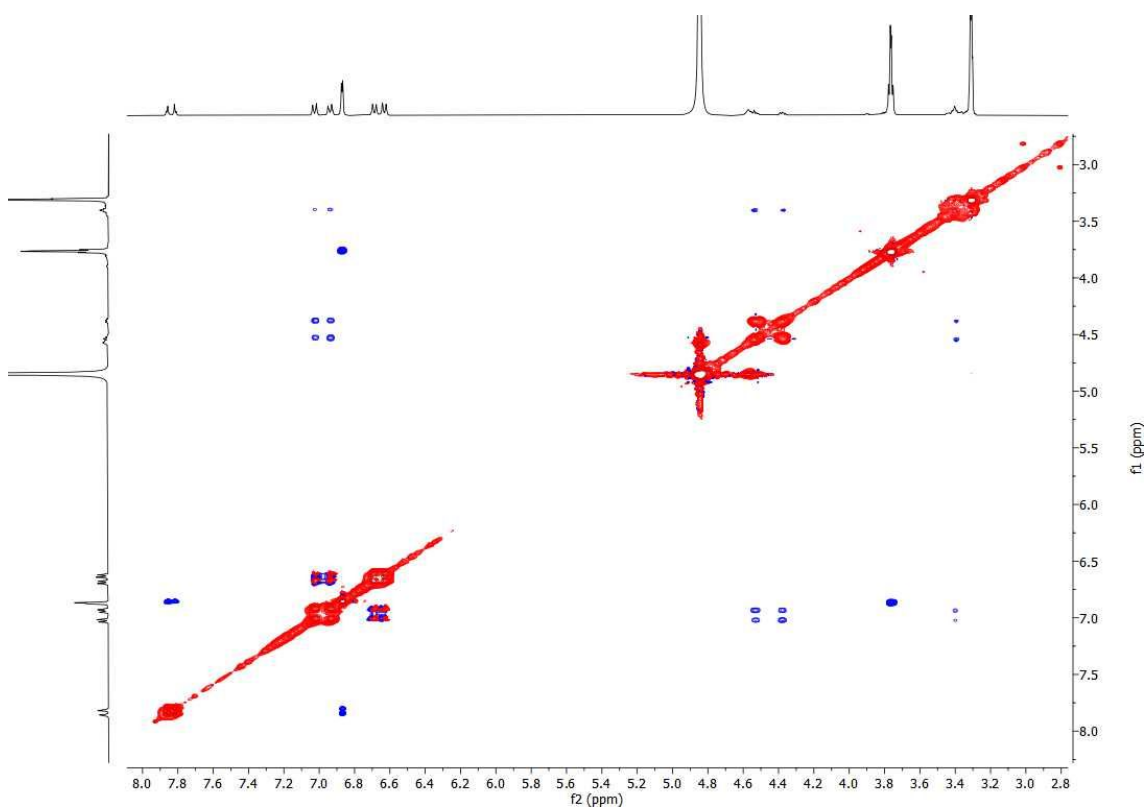

**Figure S8.** NOESY spectrum of compound **1** (400 MHz, MeOD).

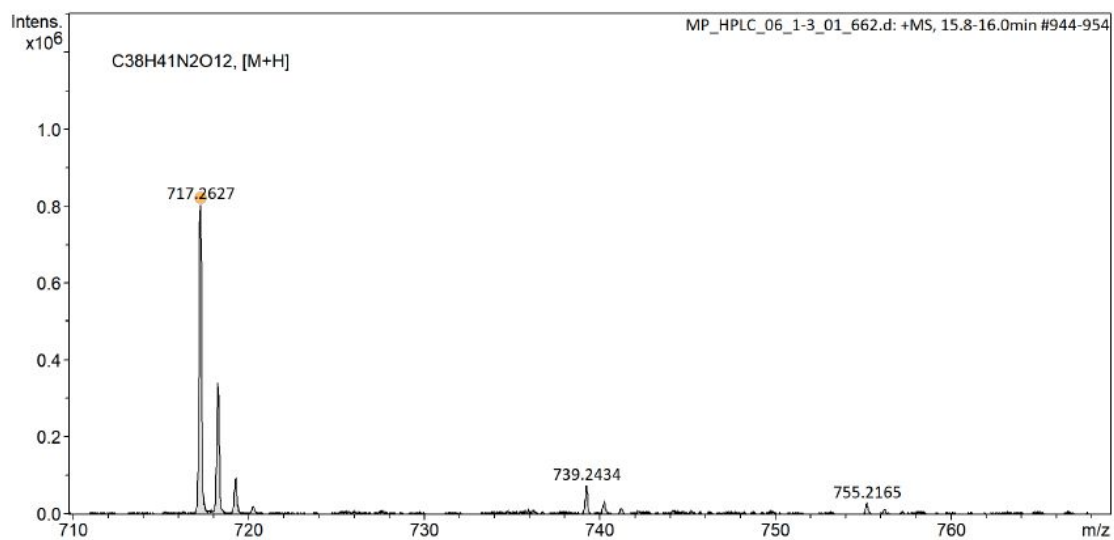

**Figure S9.** HRESIMS spectrum of compound **1** ([M + H]<sup>+</sup>, positive mode).

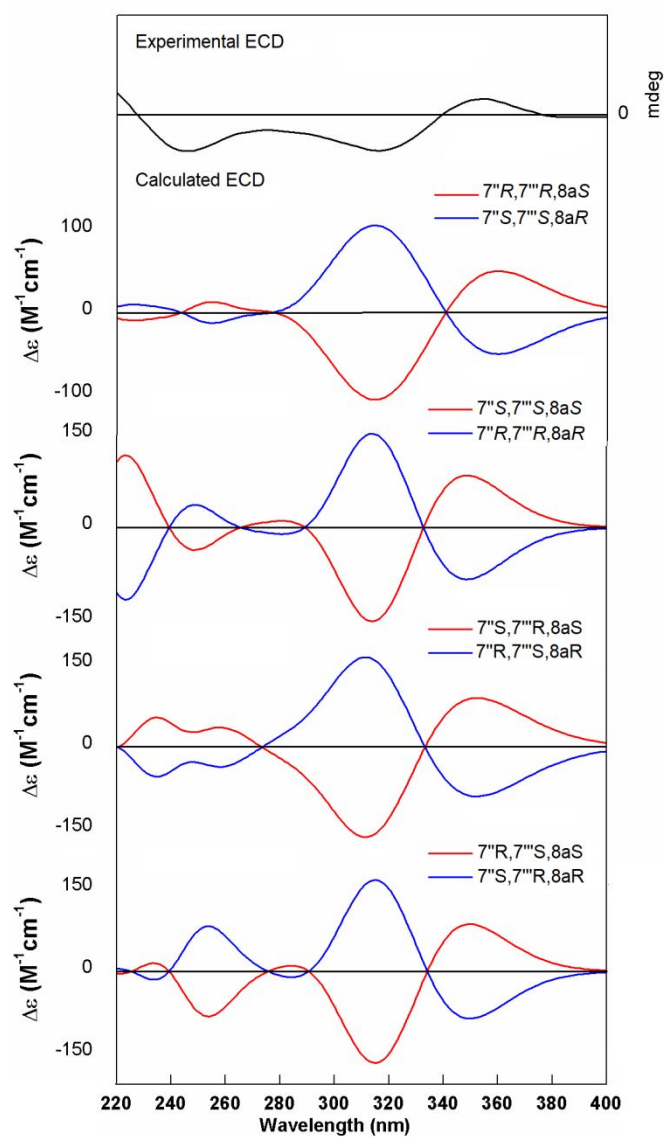

**Figure S10.** Experimental (top) and calculated (bottom) ECD spectra of all possible stereoisomers of compound **1**. aS atropisomers are marked in red and aR atropisomers are marked in blue.

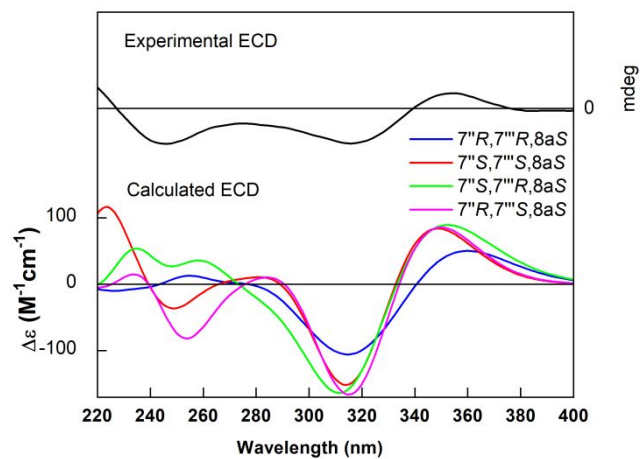

**Figure S11.** Experimental (top) and calculated (bottom) ECD spectra of aS atropisomers of compound **1**.

## 2 Spectroscopic data for compound **2**

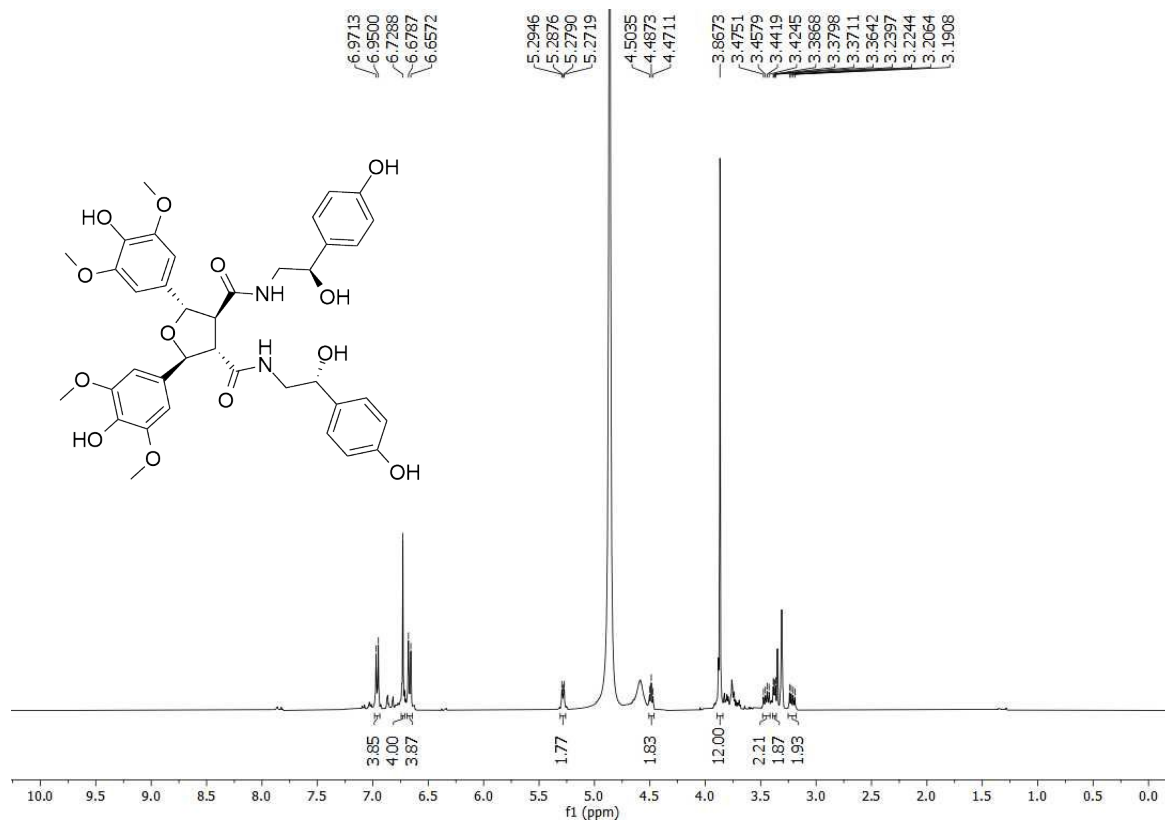

**Figure S12.**  $^1\text{H}$  NMR spectrum of compound **2** (400 MHz, MeOD).



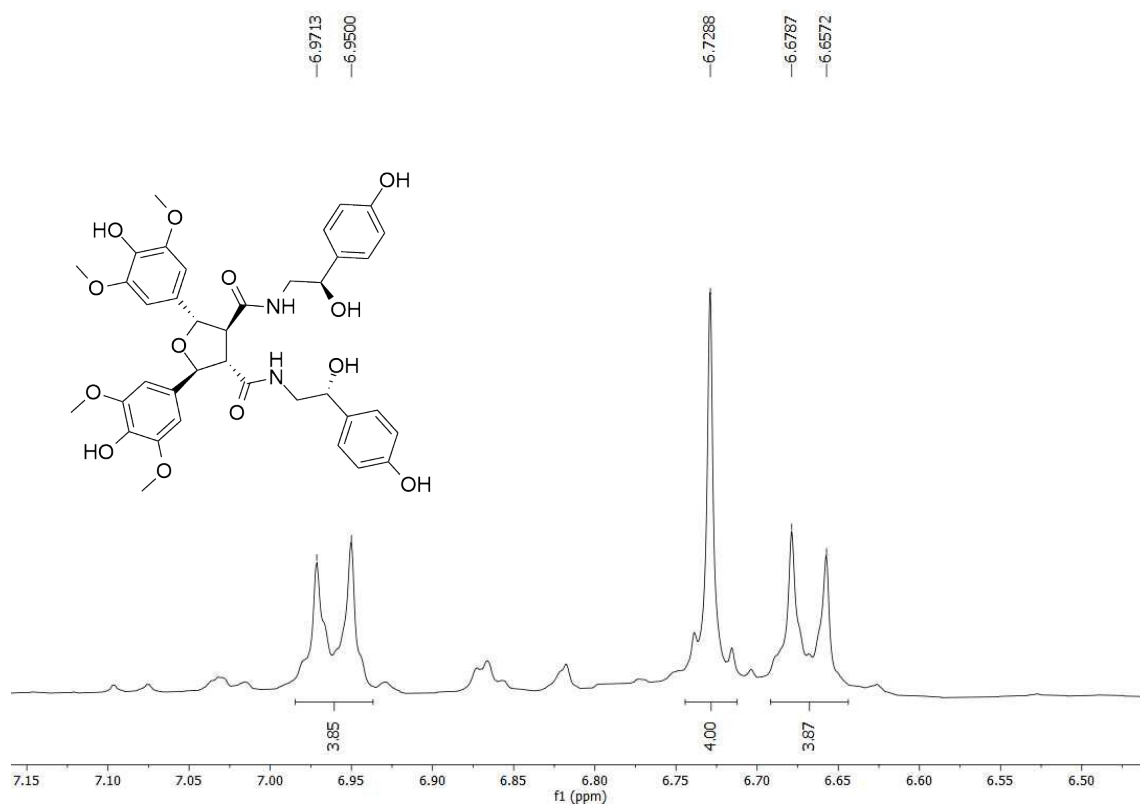

**Figure S13.** Amplification of the  $^1\text{H}$  NMR spectrum of compound **2** (400 MHz, MeOD).

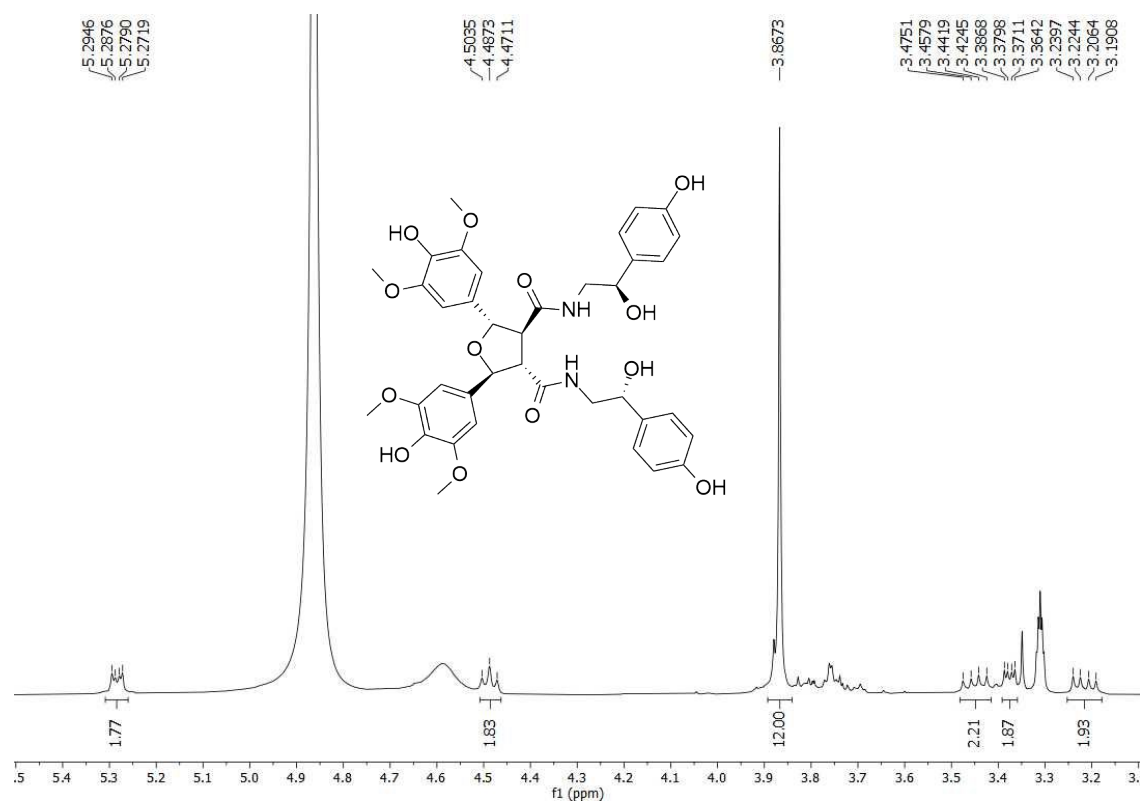

**Figure S14.** Amplification of the  $^1\text{H}$  NMR spectrum of compound **2** (400 MHz, MeOD).

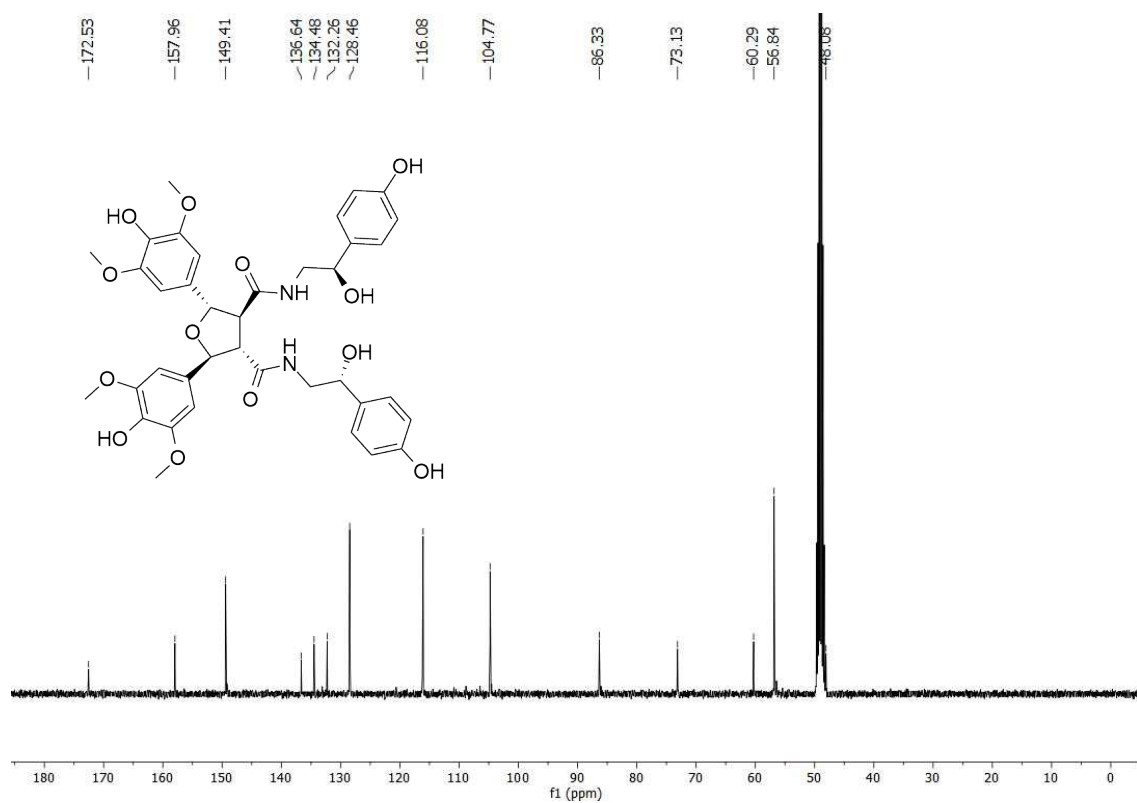

**Figure S15.** <sup>13</sup>C-BB NMR spectrum of compound 2 (100 MHz, MeOD).

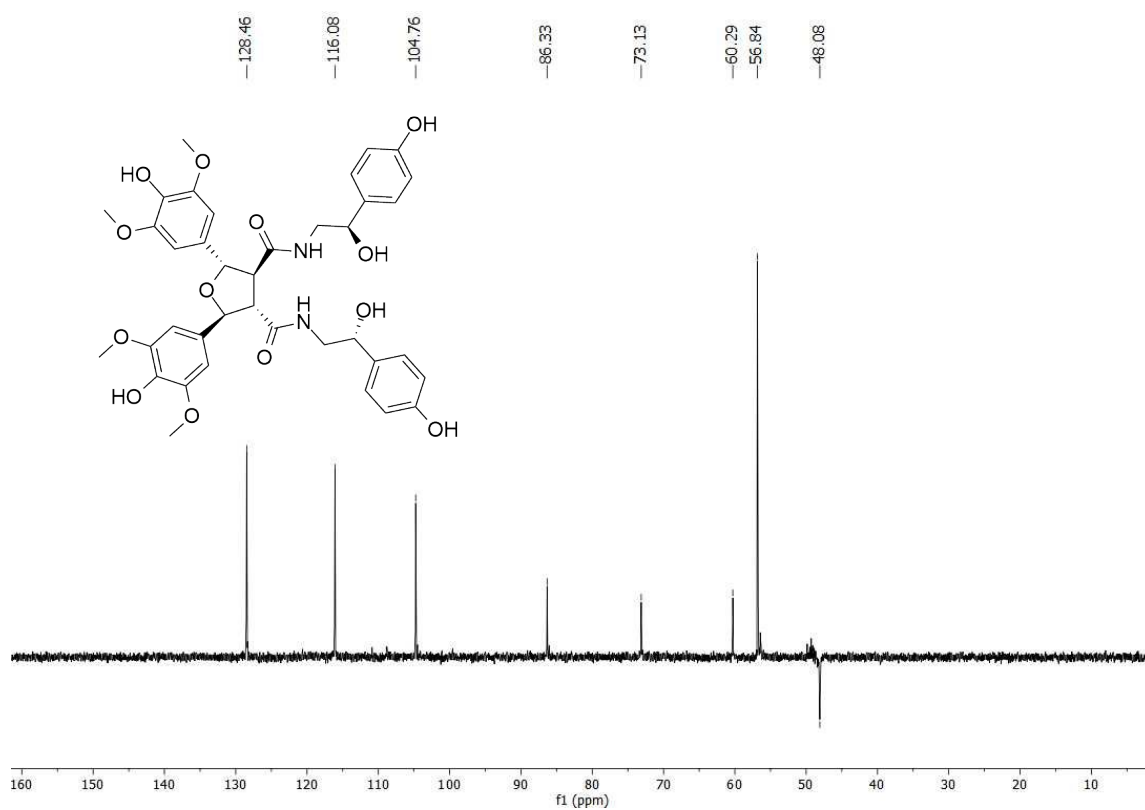

**Figure S16.** <sup>13</sup>C-DEPT135 NMR spectrum of compound 2 (100 MHz, MeOD).

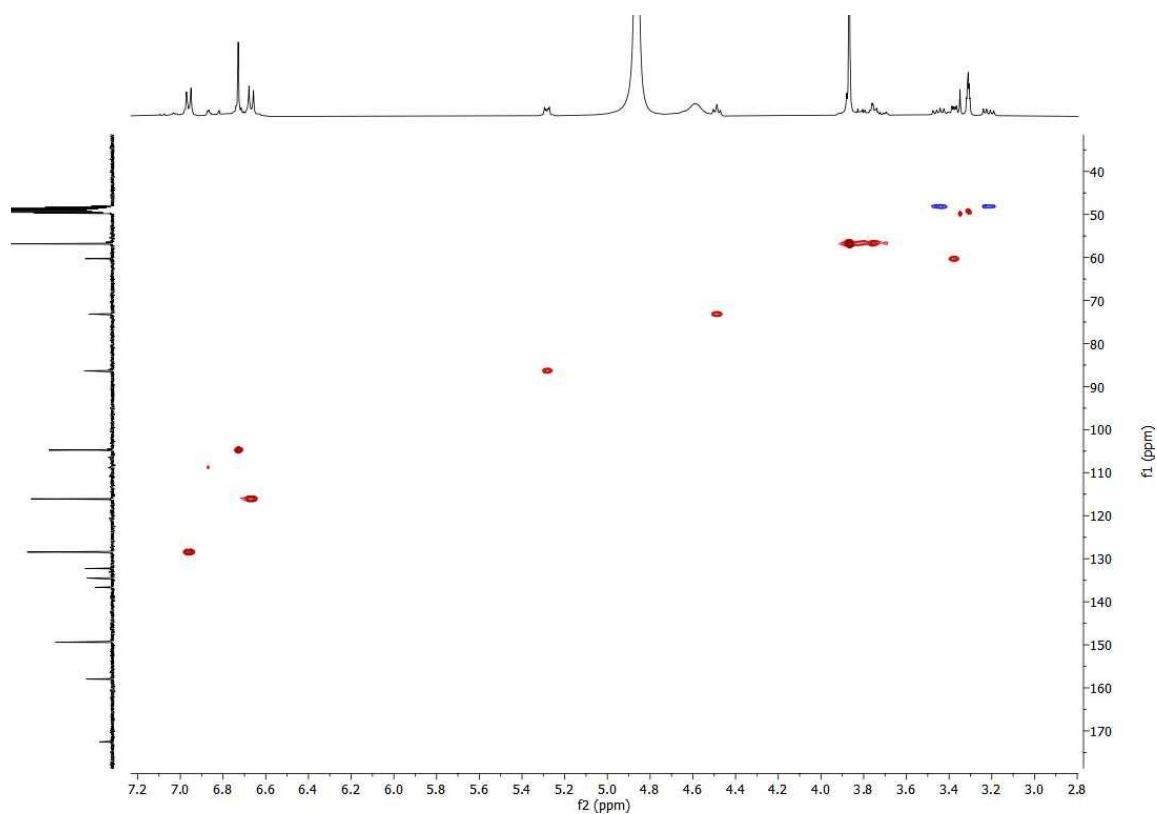

**Figure S17.** HSQC spectrum of compound **2** (400/100 MHz, MeOD).

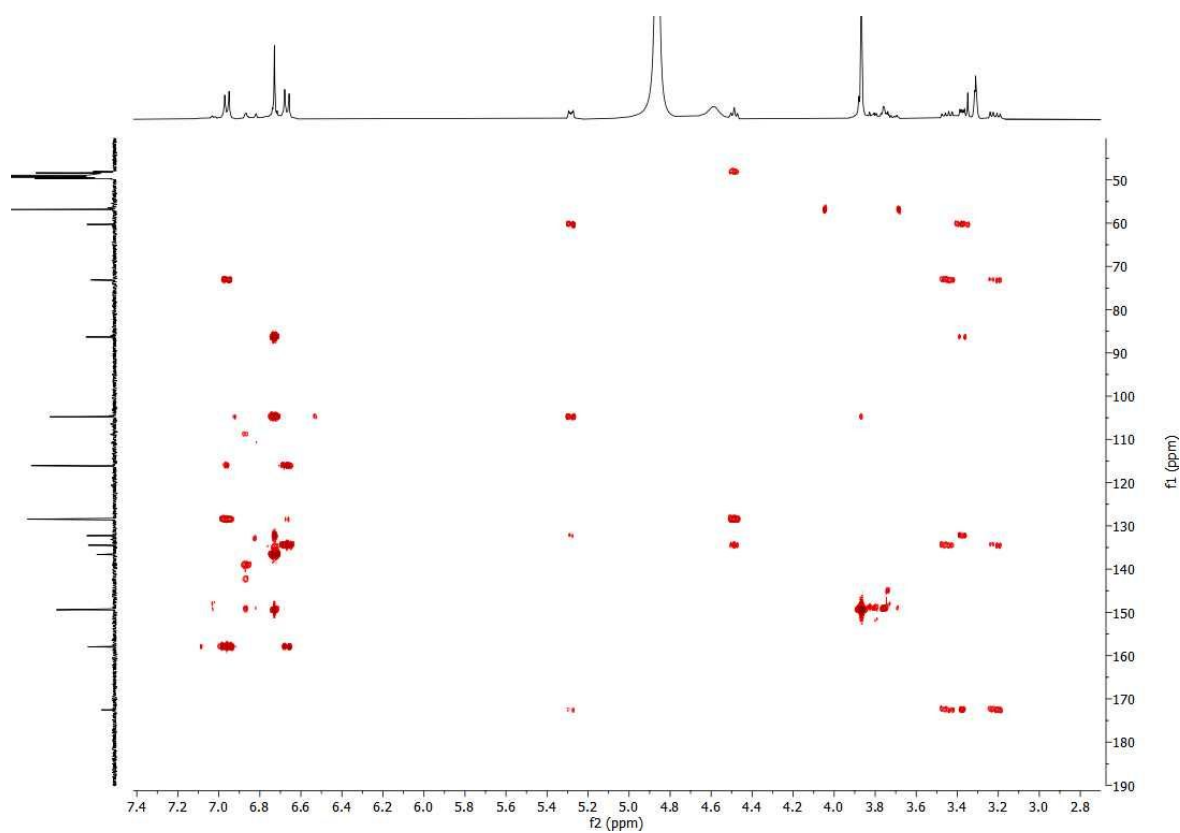

**Figure S18.** HMBC spectrum of compound **2** (400/100 MHz, MeOD).

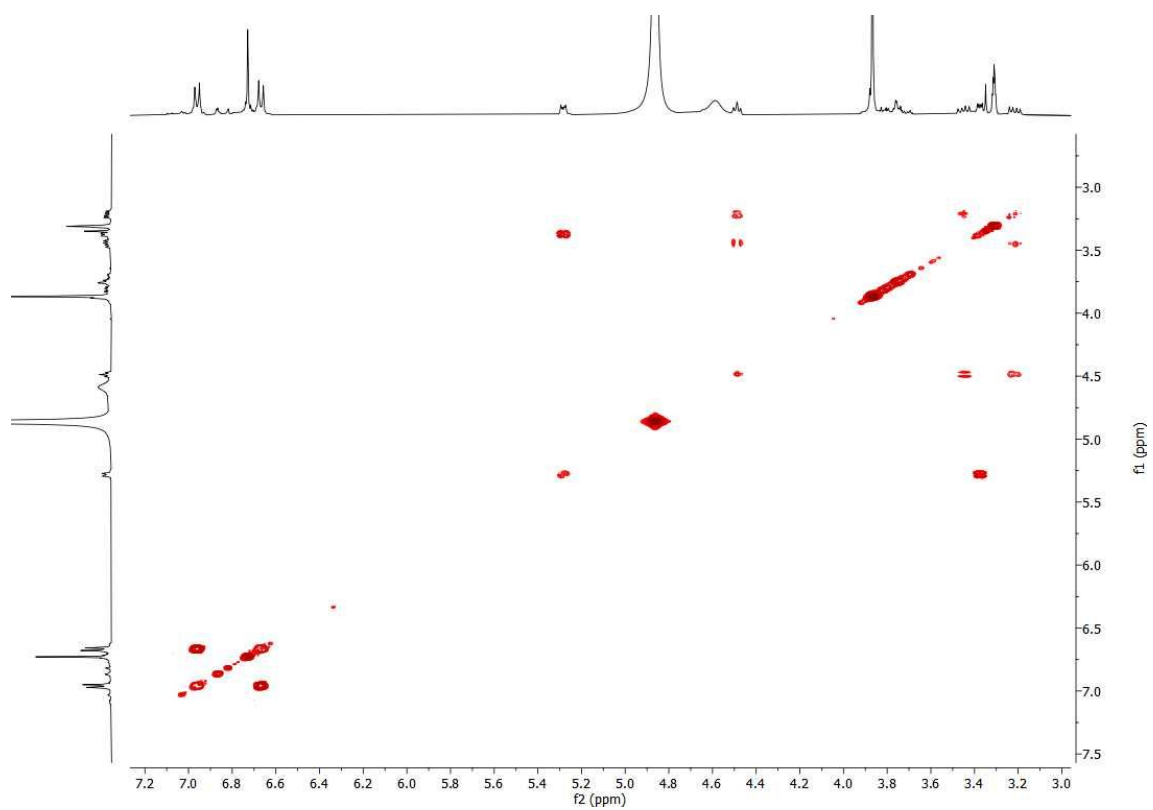

**Figure S19.** COSY spectrum of compound **2** (400 MHz, MeOD).

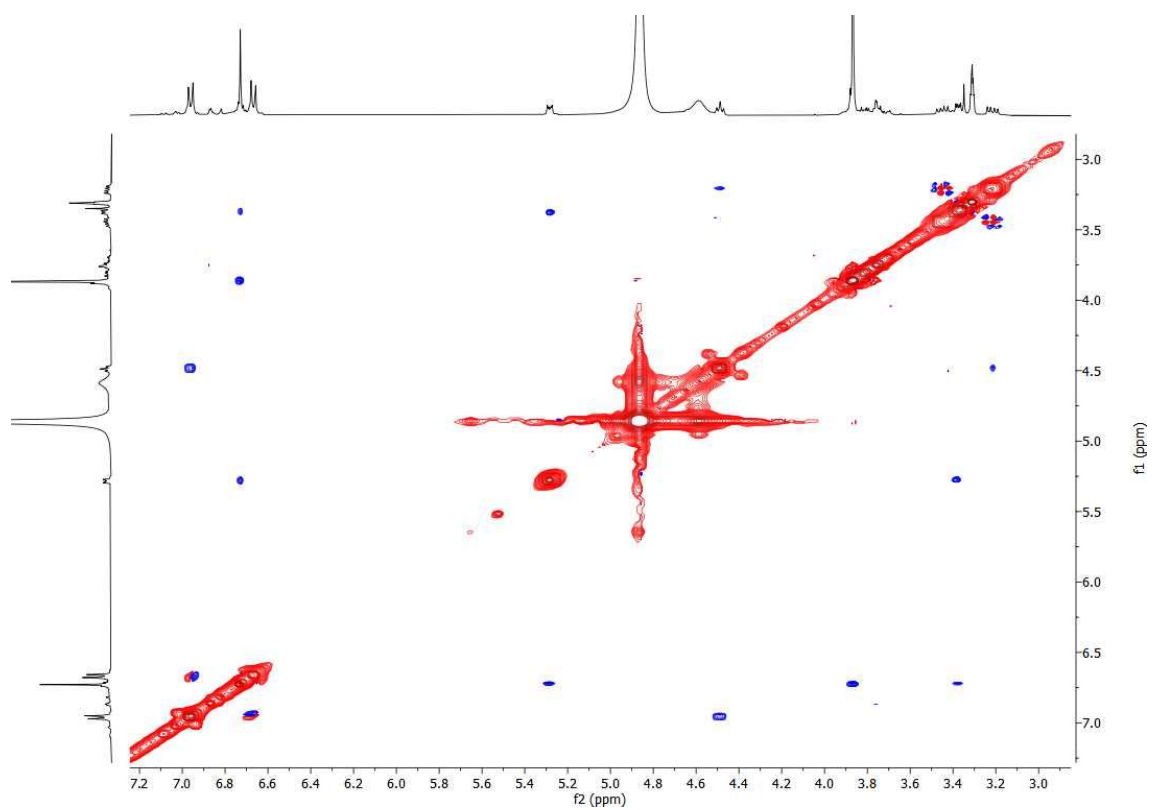

**Figure S20.** NOESY spectrum of compound **2** (400 MHz, MeOD).

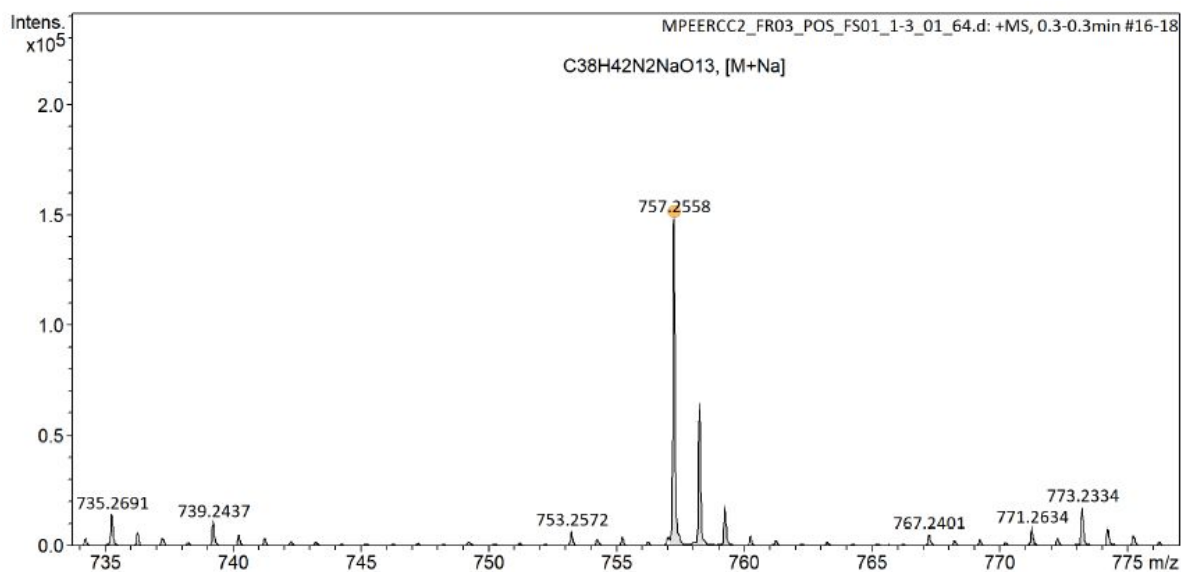

**Figure S21.** HRESIMS spectrum of compound 2 ( $[M + Na]^+$ , positive mode).

### 3 Spectroscopic data for Compound 3

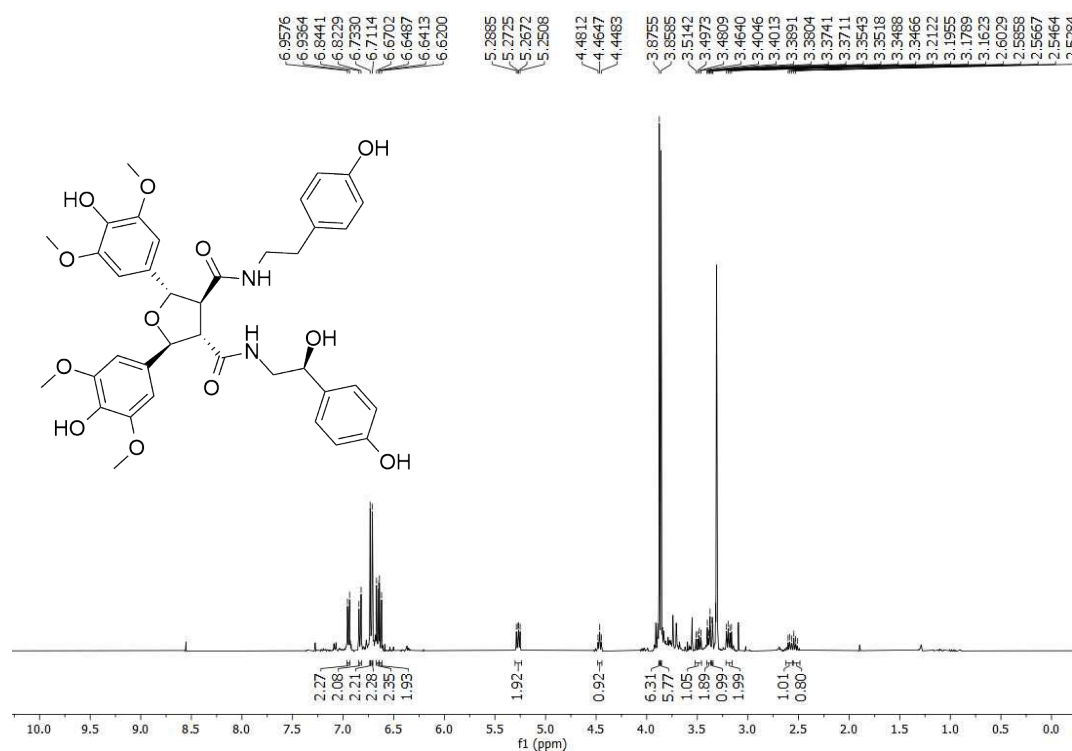

**Figure S22.**  $^1\text{H}$  NMR spectrum of compound 3 (400 MHz, MeOD).

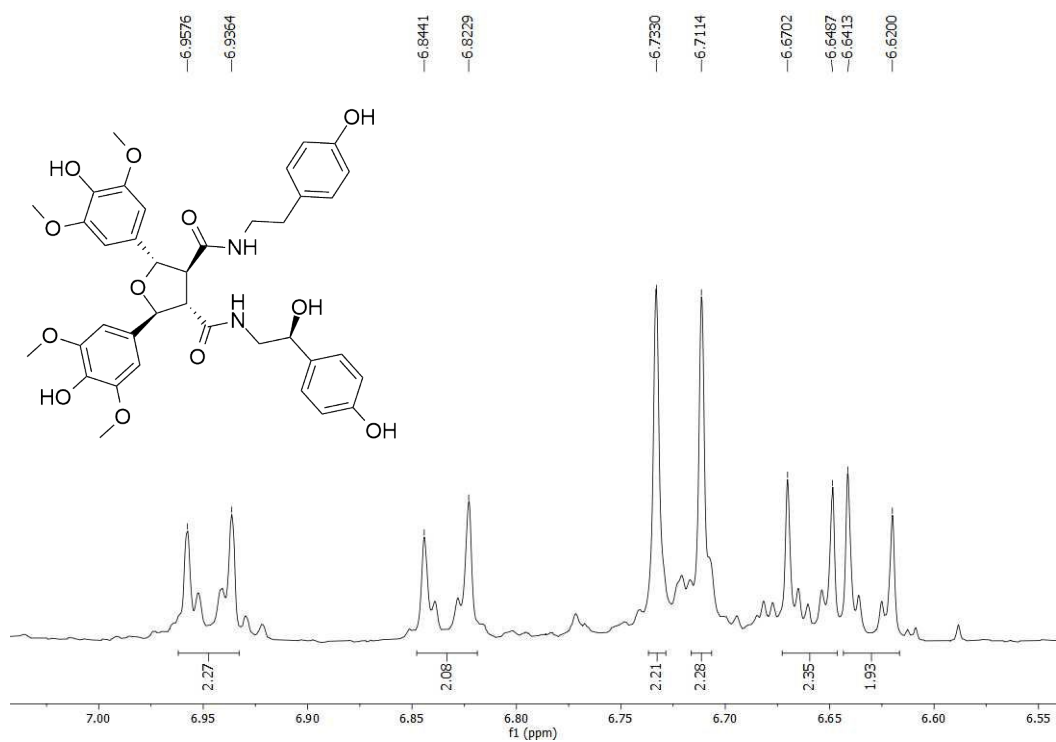

**Figure S23.** Amplification of the <sup>1</sup>H NMR spectrum of compound 3 (400 MHz, MeOD).

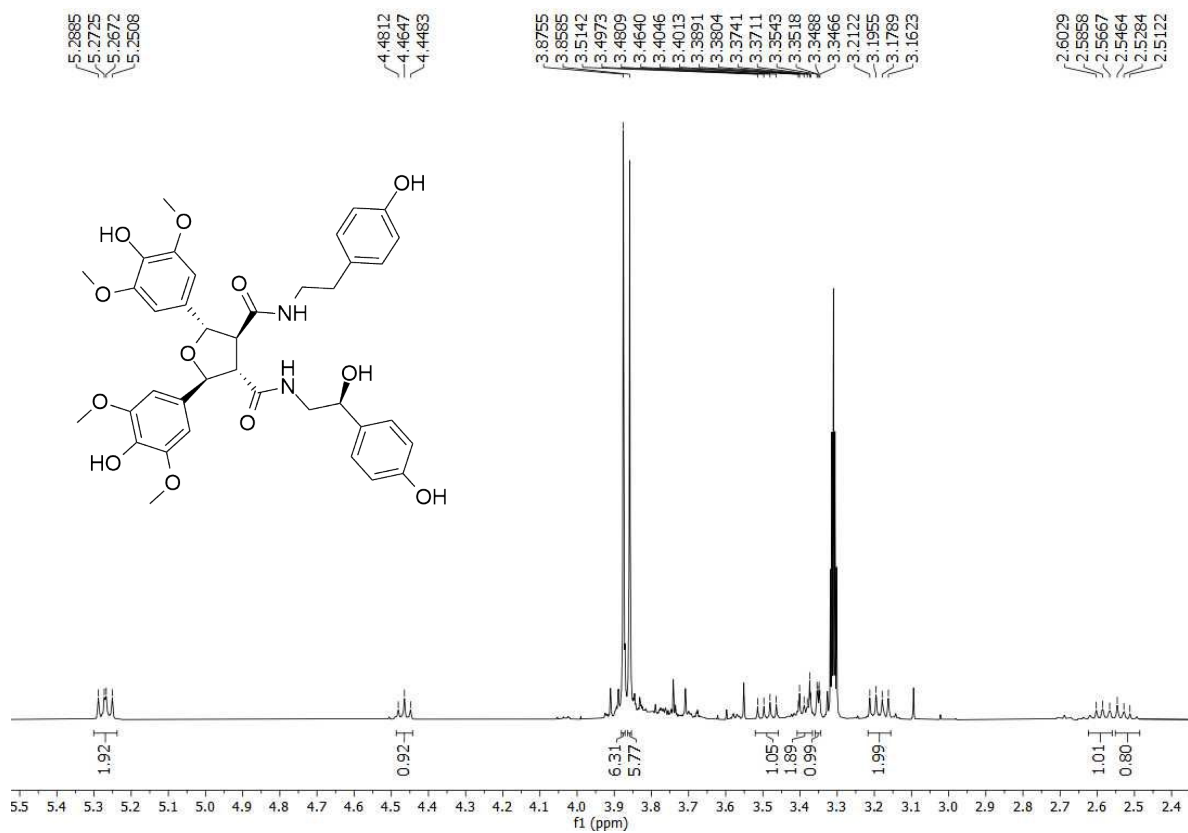

**Figure S24.** Amplification of the <sup>1</sup>H NMR spectrum of compound 3 (400 MHz, MeOD).

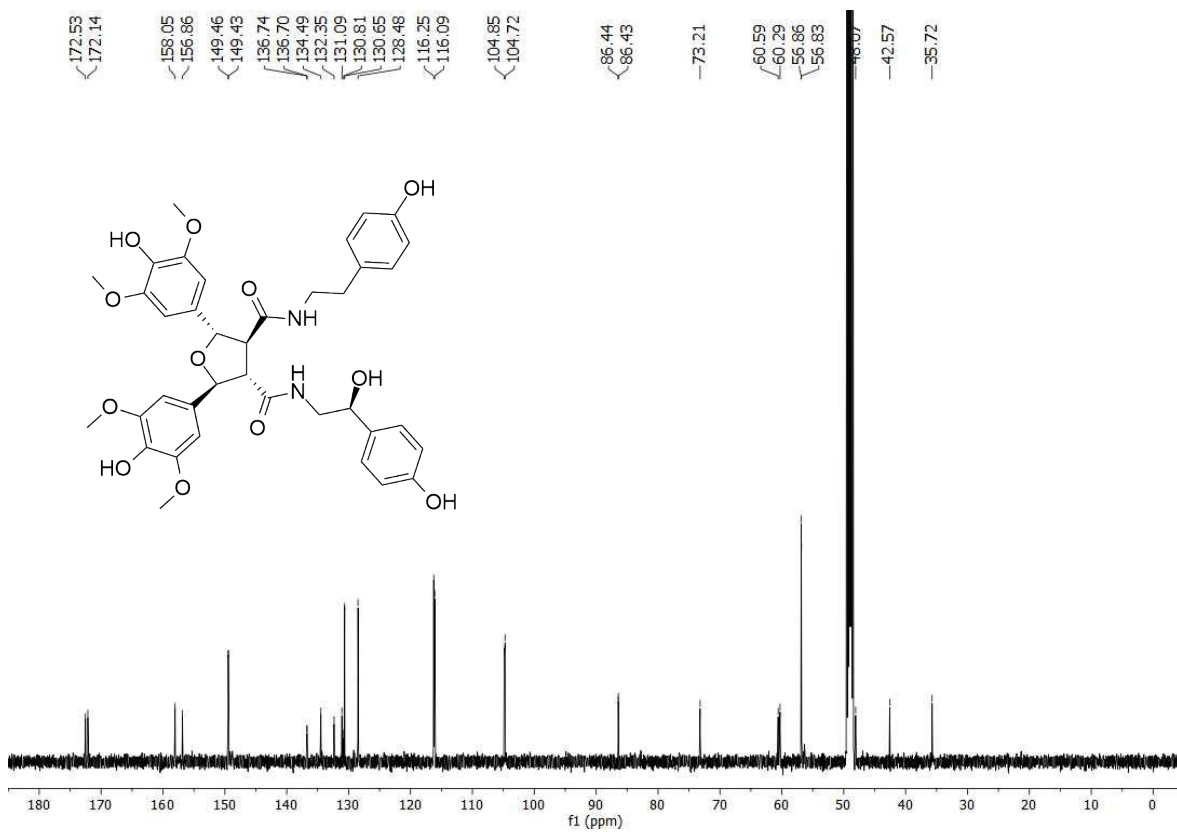

**Figure S25.** <sup>13</sup>C-BB NMR spectrum of compound **3** (100 MHz, MeOD).

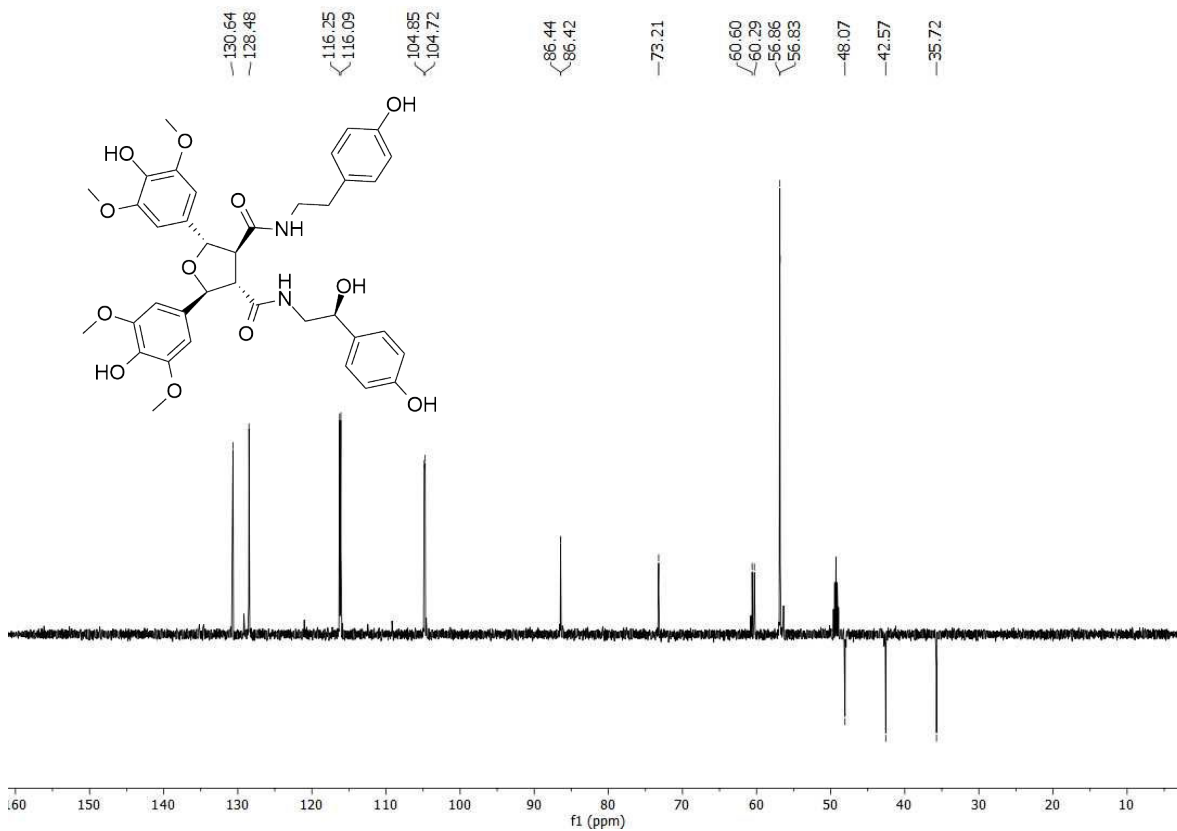

**Figure S26.** <sup>13</sup>C-DEPT135 NMR spectrum of compound **3** (100 MHz, MeOD).

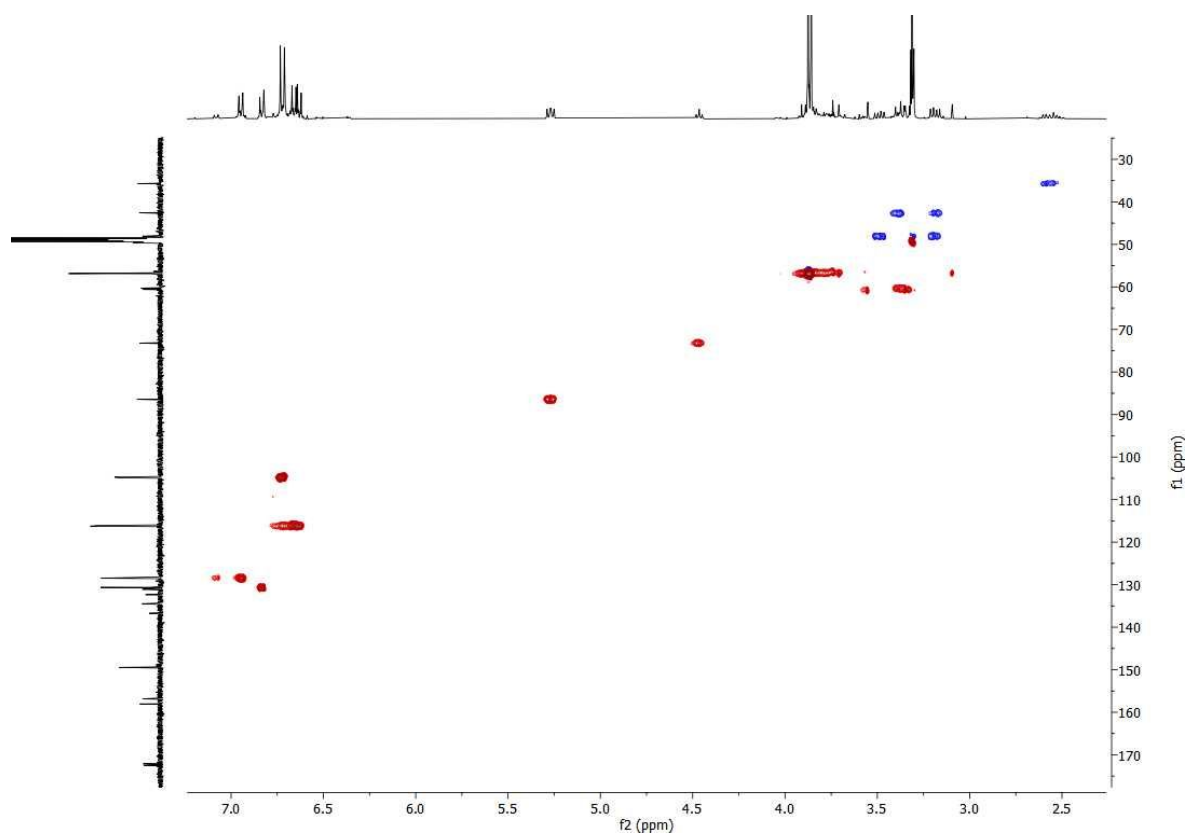

**Figure S27.** HSQC spectrum of compound **3** (400/100 MHz, MeOD).

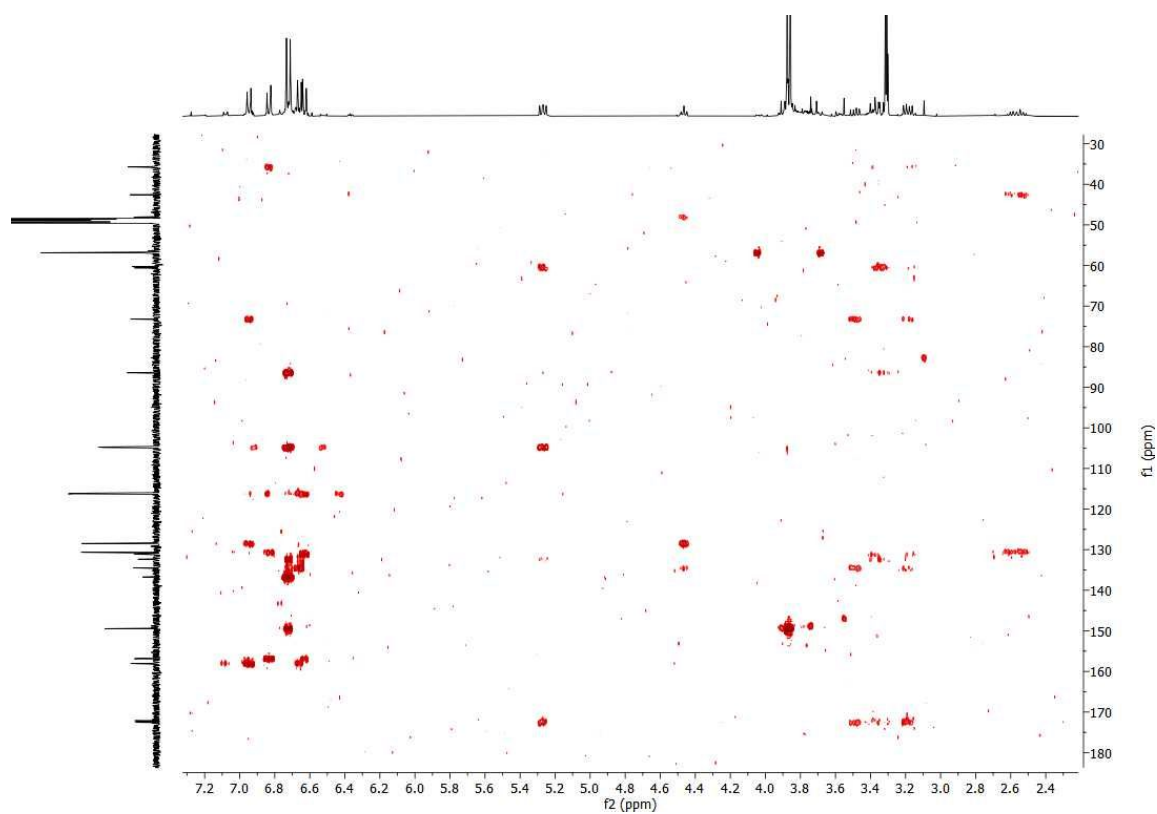

**Figure S28.** HMBC spectrum of compound **3** (400/100 MHz, MeOD).





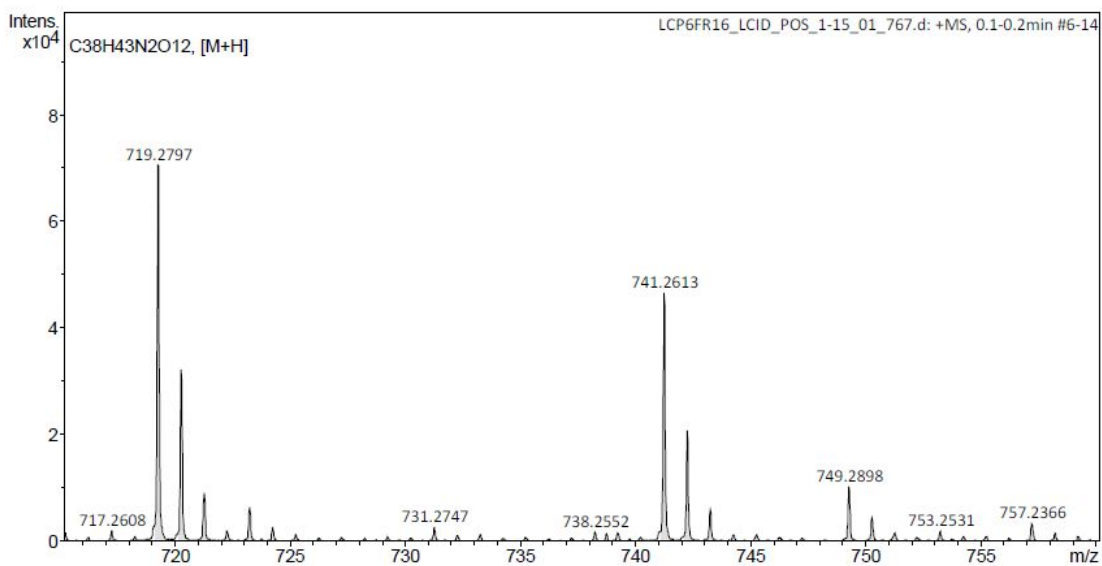

**Figure S31.** HRESIMS spectrum of compound **3** ( $[M + H]^+$ , positive mode).

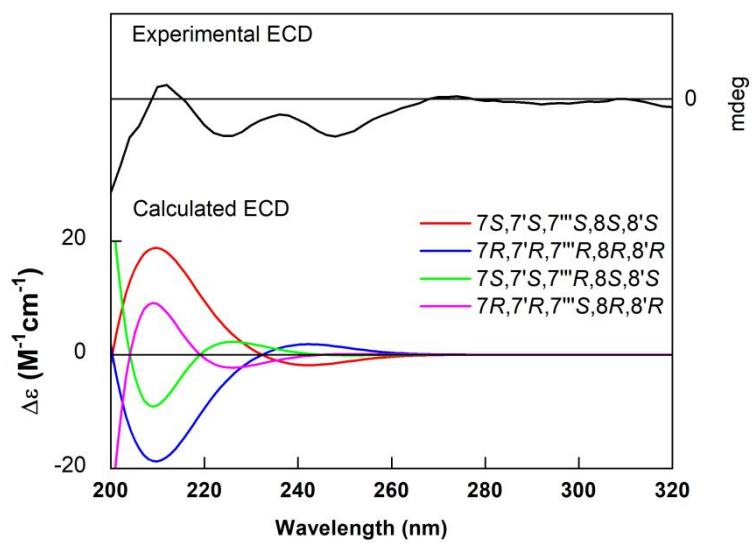

**Figure S32.** Experimental (top) and calculated (bottom) ECD spectra of all possible stereoisomers of compound **3**.

## 4 Spectroscopic data for Compound 4

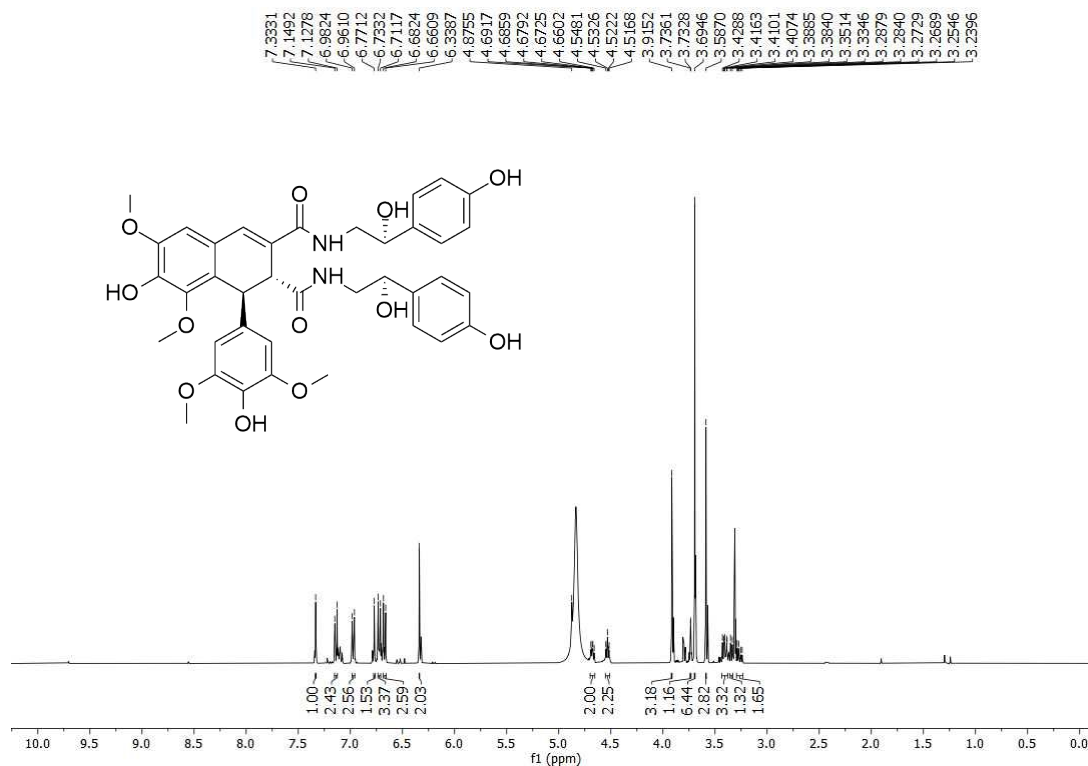

Figure S33.  $^1\text{H}$  NMR spectrum of compound 4 (400 MHz, MeOD).

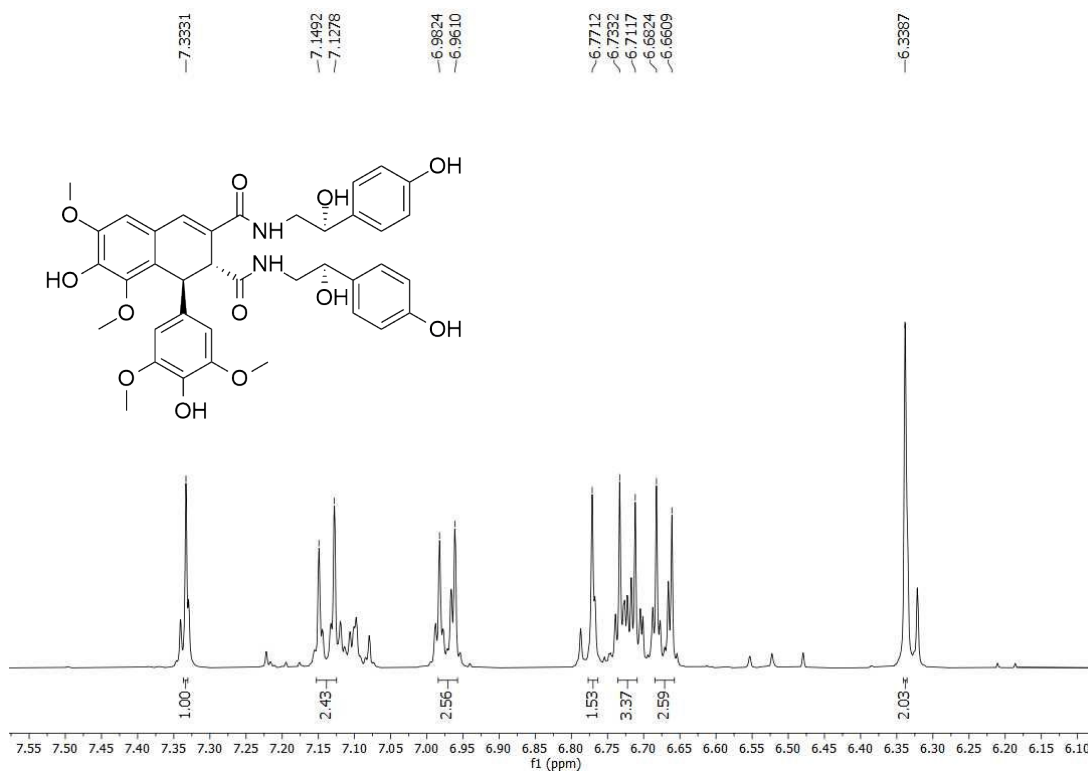

Figure S34. Amplification of the  $^1\text{H}$  NMR spectrum of compound 4 (400 MHz, MeOD).

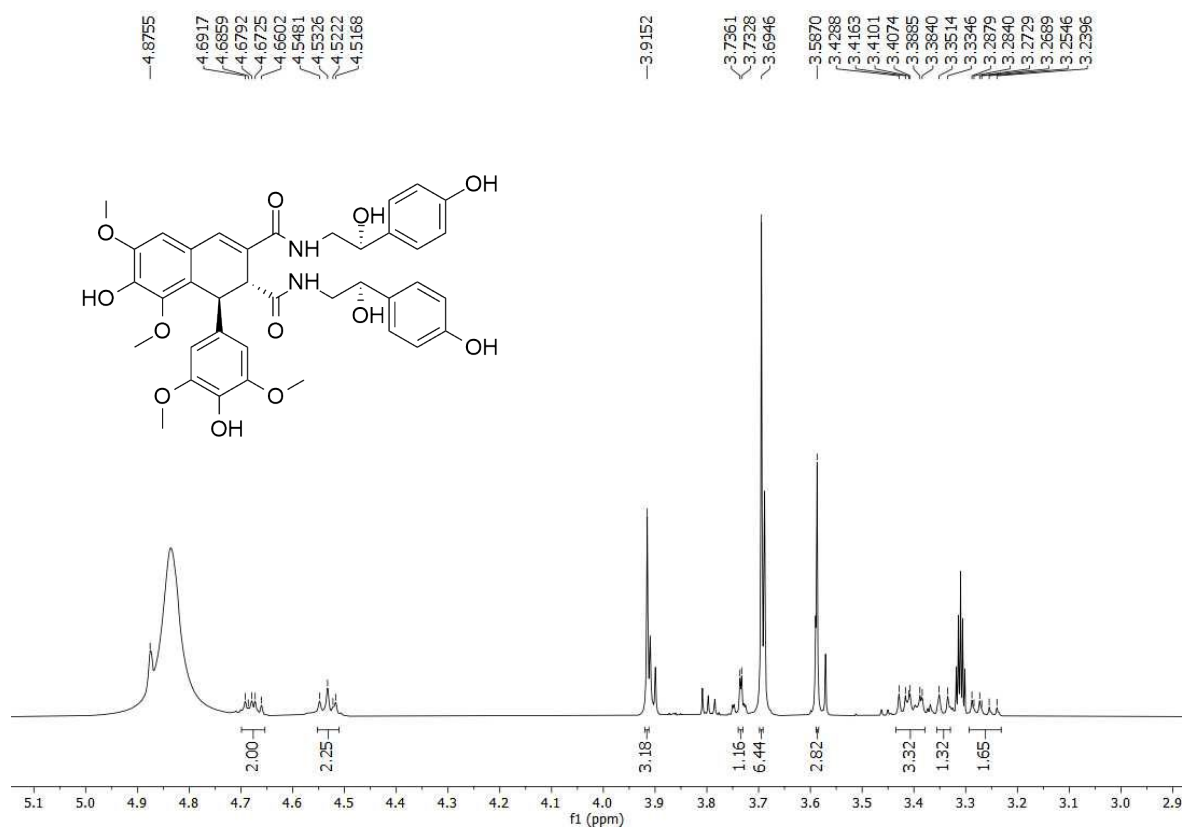

**Figure S35.** Amplification of the <sup>1</sup>H NMR spectrum of compound 4 (400 MHz, MeOD).

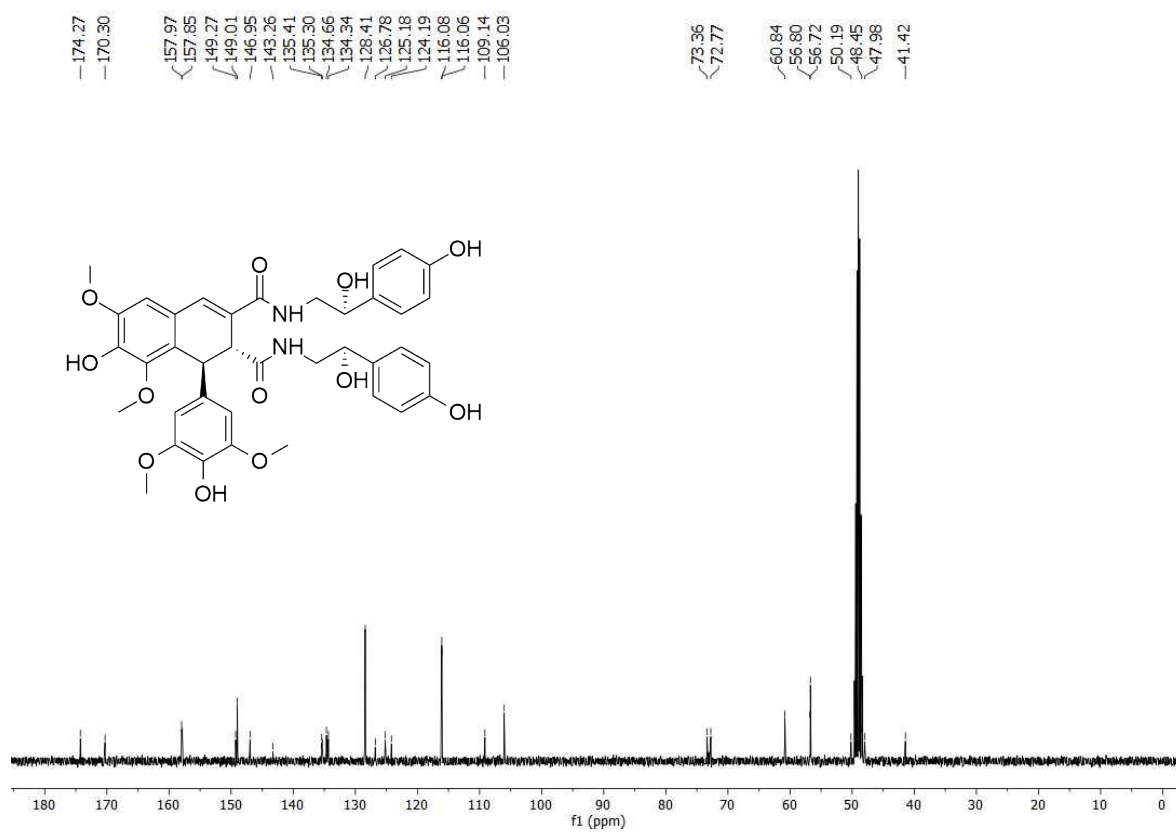

**Figure S36.** <sup>13</sup>C-BB NMR spectrum of compound 4 (100 MHz, MeOD).

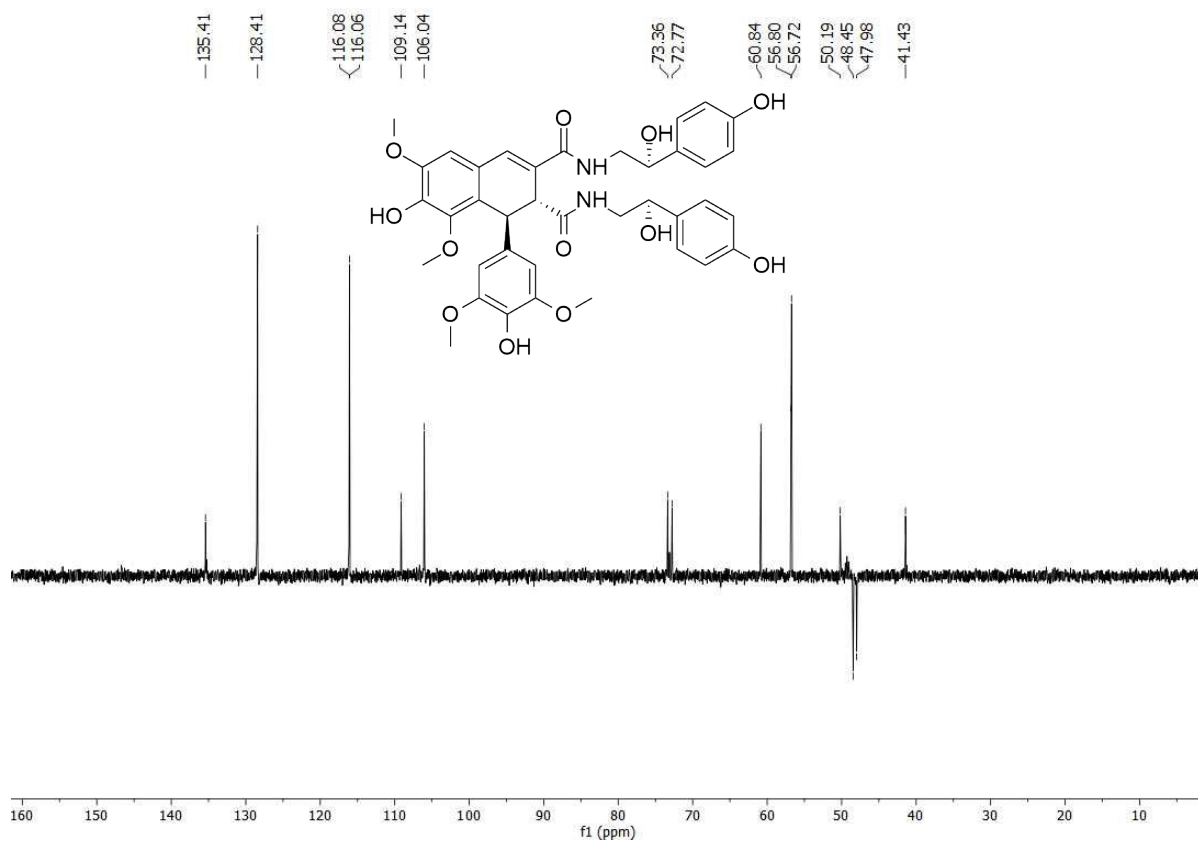

**Figure S37.**  $^{13}\text{C}$ -DEPT135 NMR spectrum of compound **4** (100 MHz, MeOD).

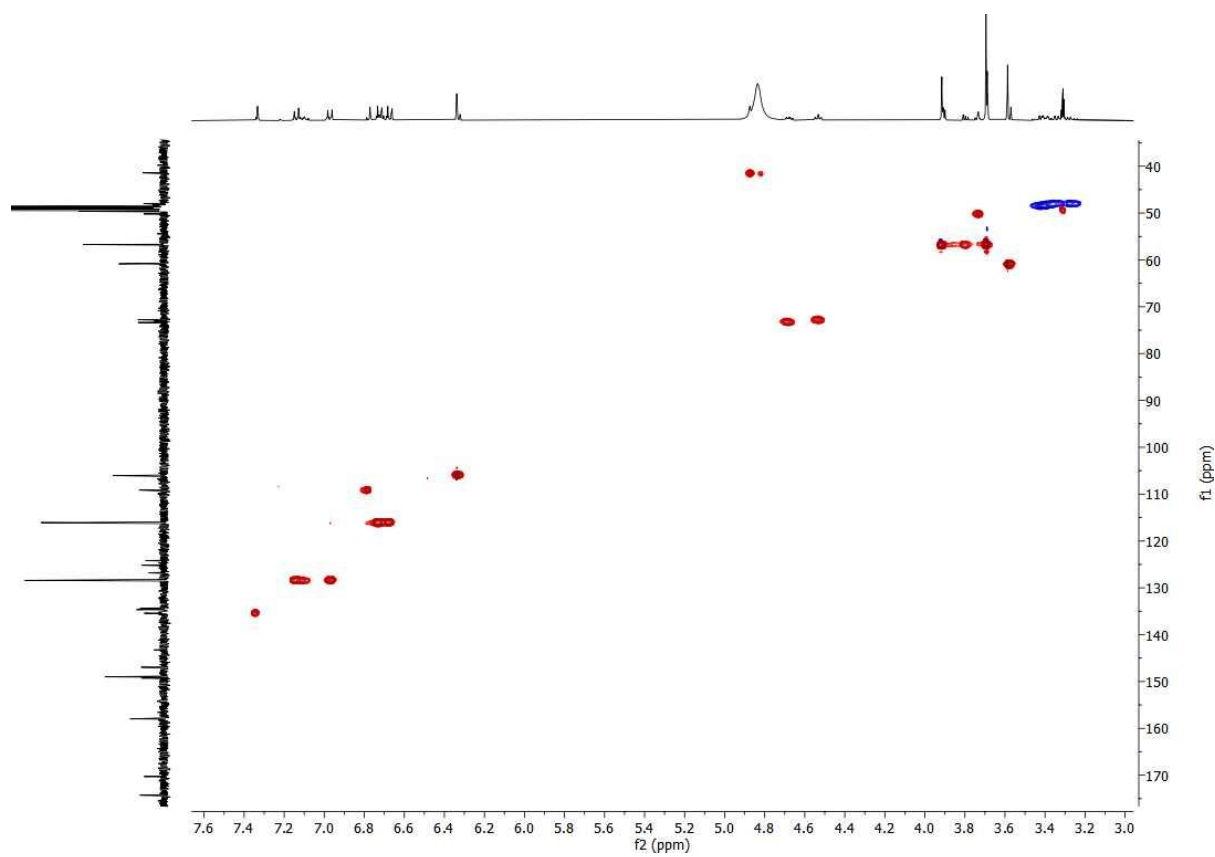

**Figure S38.** HSQC spectrum of compound **4** (400/100 MHz, MeOD).

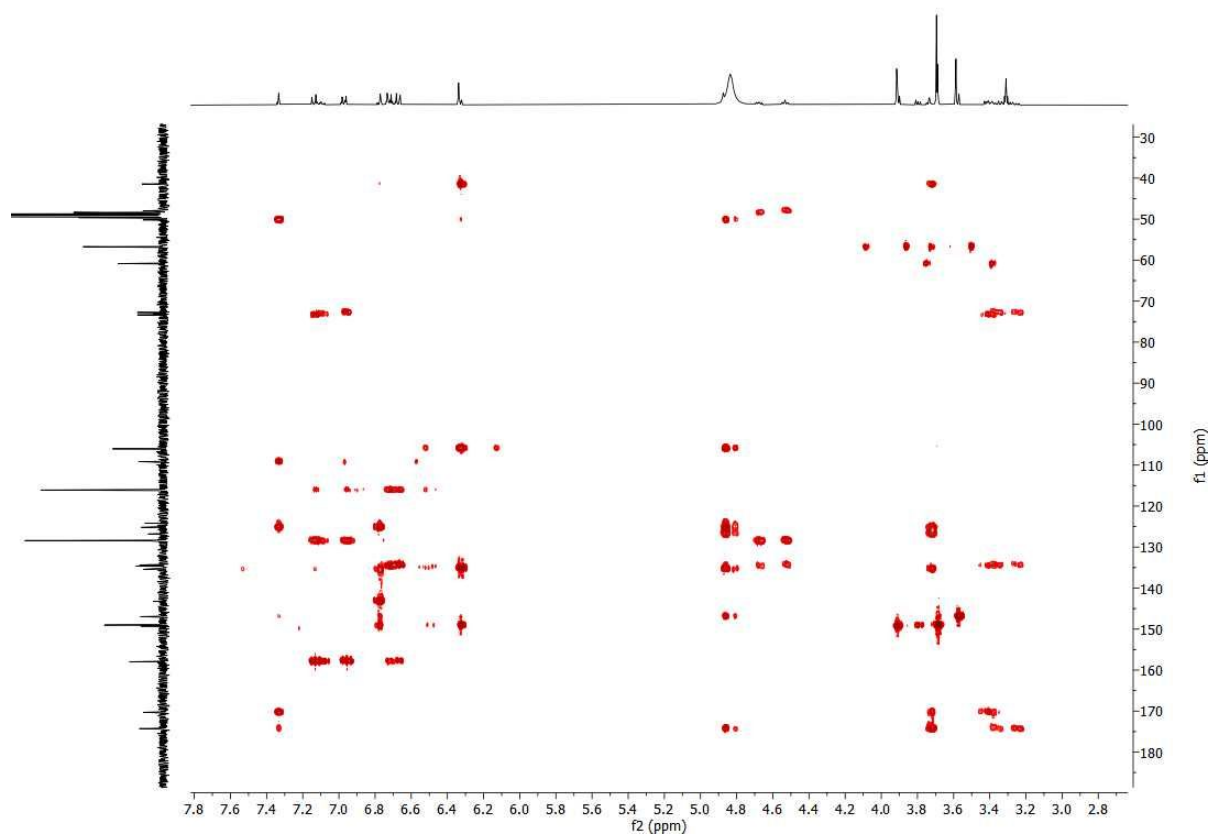

**Figure S39.** HMBC spectrum of compound **4** (400/100 MHz, MeOD).

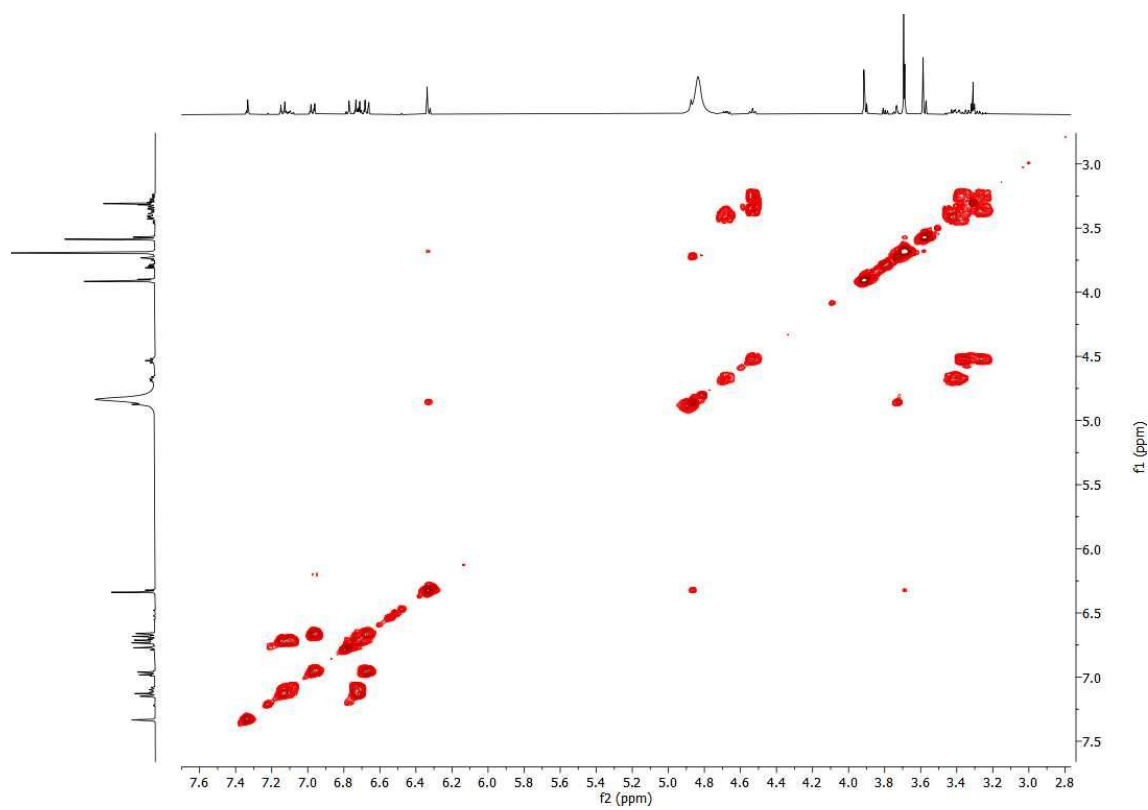

**Figure S40.** COSY spectrum of compound **4** (400 MHz, MeOD).

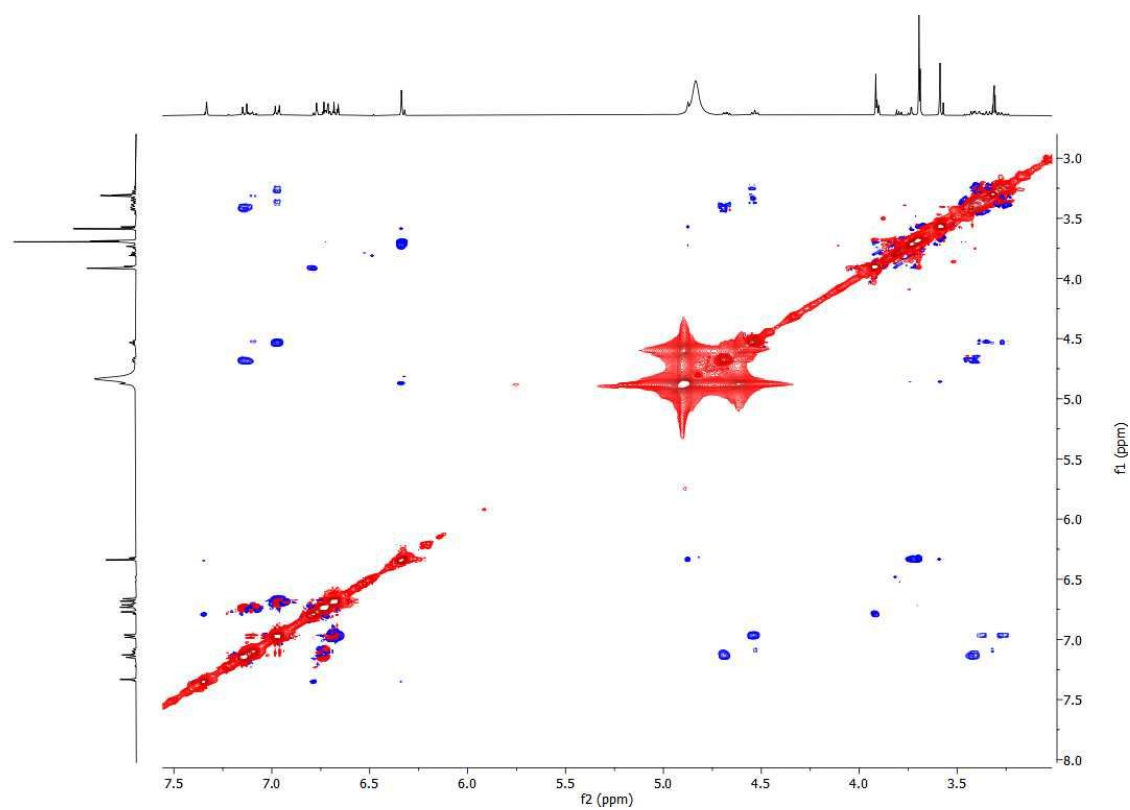

**Figure S41.** NOESY spectrum of compound **4** (400 MHz, MeOD).

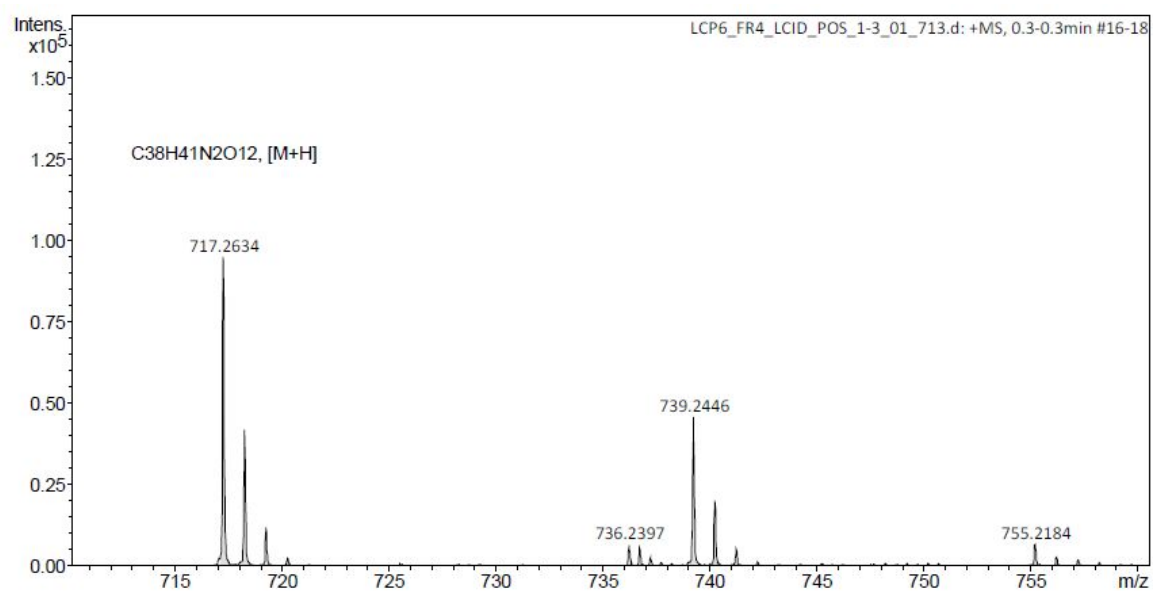

**Figure S42.** HRESIMS spectrum of compound **4** ( $[M + H]^+$ , positive mode).

## 5 Spectroscopic data for compound 5

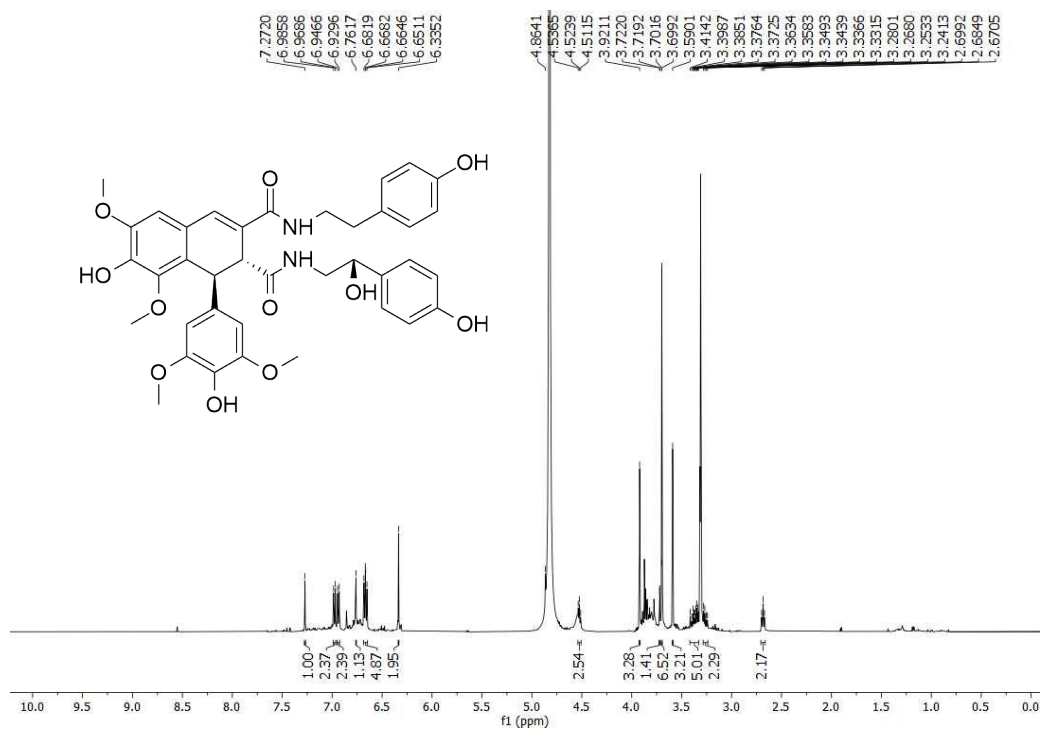

**Figure S43.**  $^1\text{H}$  NMR spectrum of compound **5** (500 MHz, MeOD).

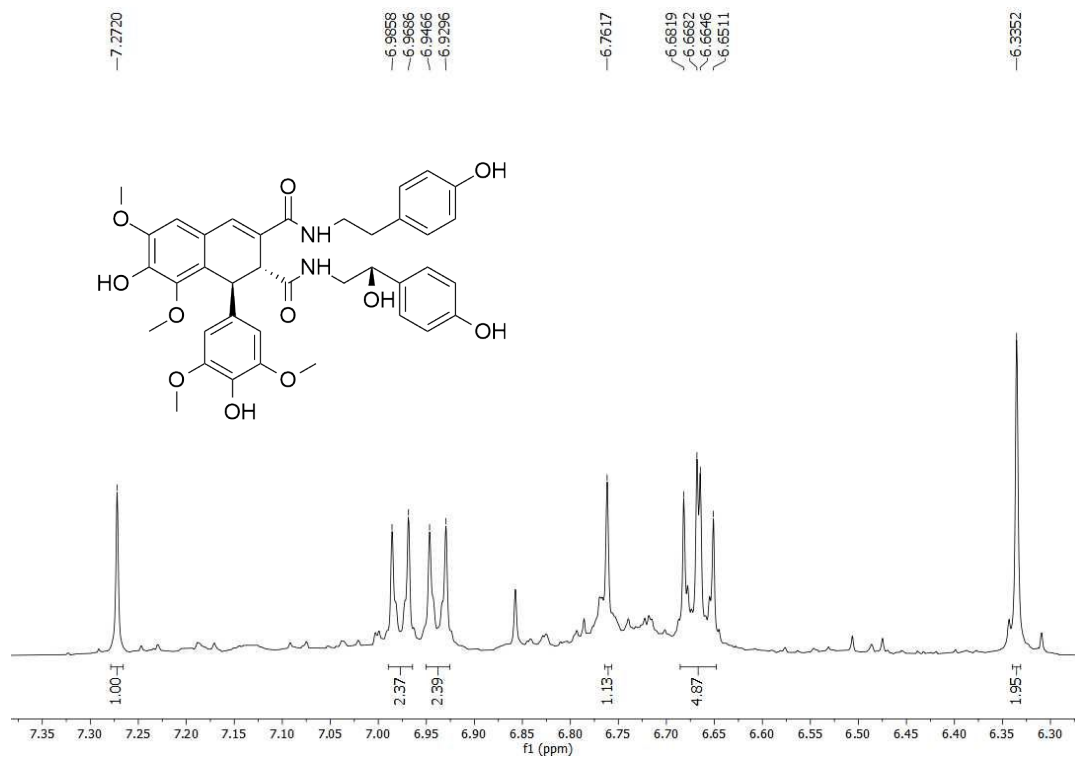

**Figure S44.** Amplification of the  $^1\text{H}$  NMR spectrum of compound **5** (500 MHz, MeOD).



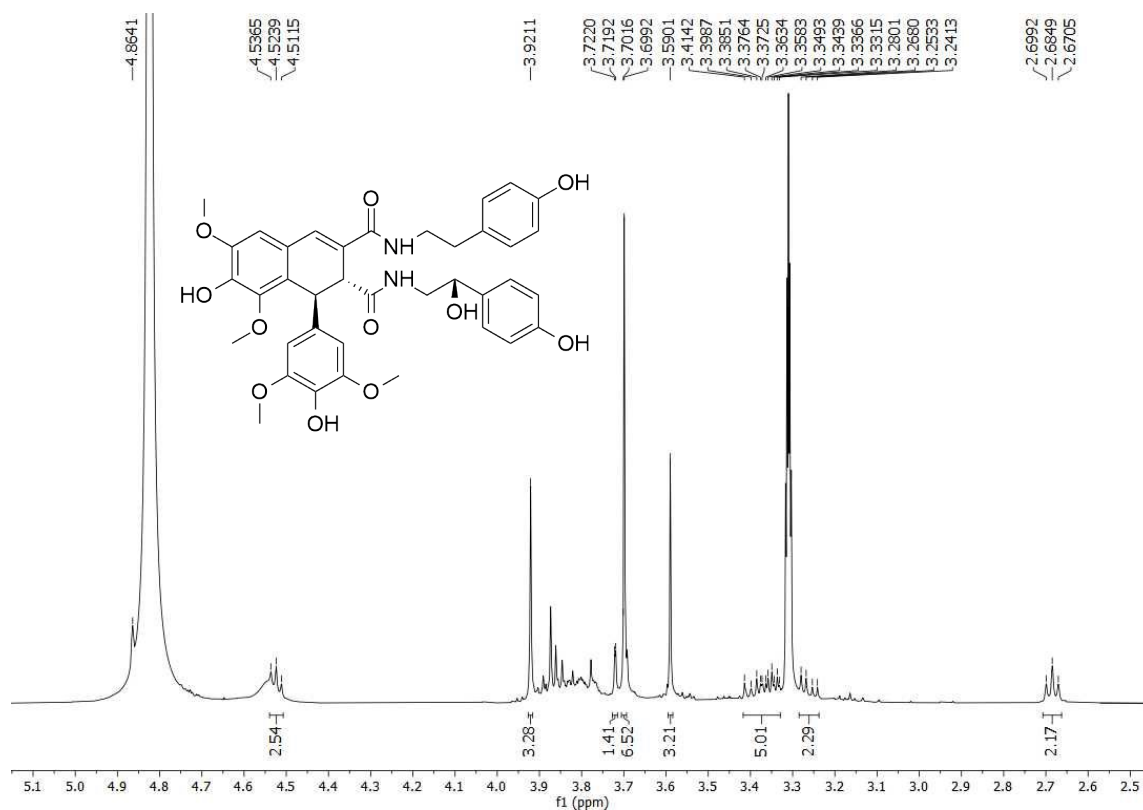

**Figure S45.** Amplification of the <sup>1</sup>H NMR spectrum of compound **5** (500 MHz, MeOD).

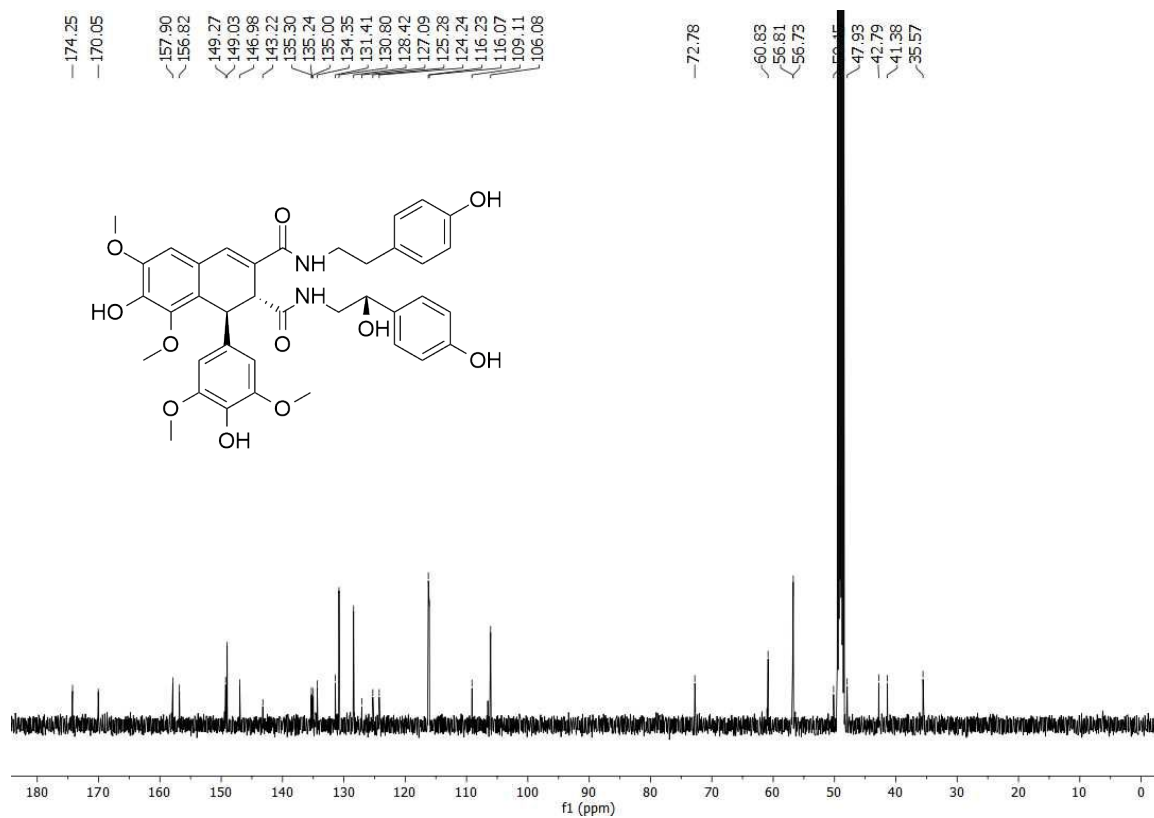

**Figure S46.** <sup>13</sup>C-BB NMR spectrum of compound **5** (125 MHz, MeOD).

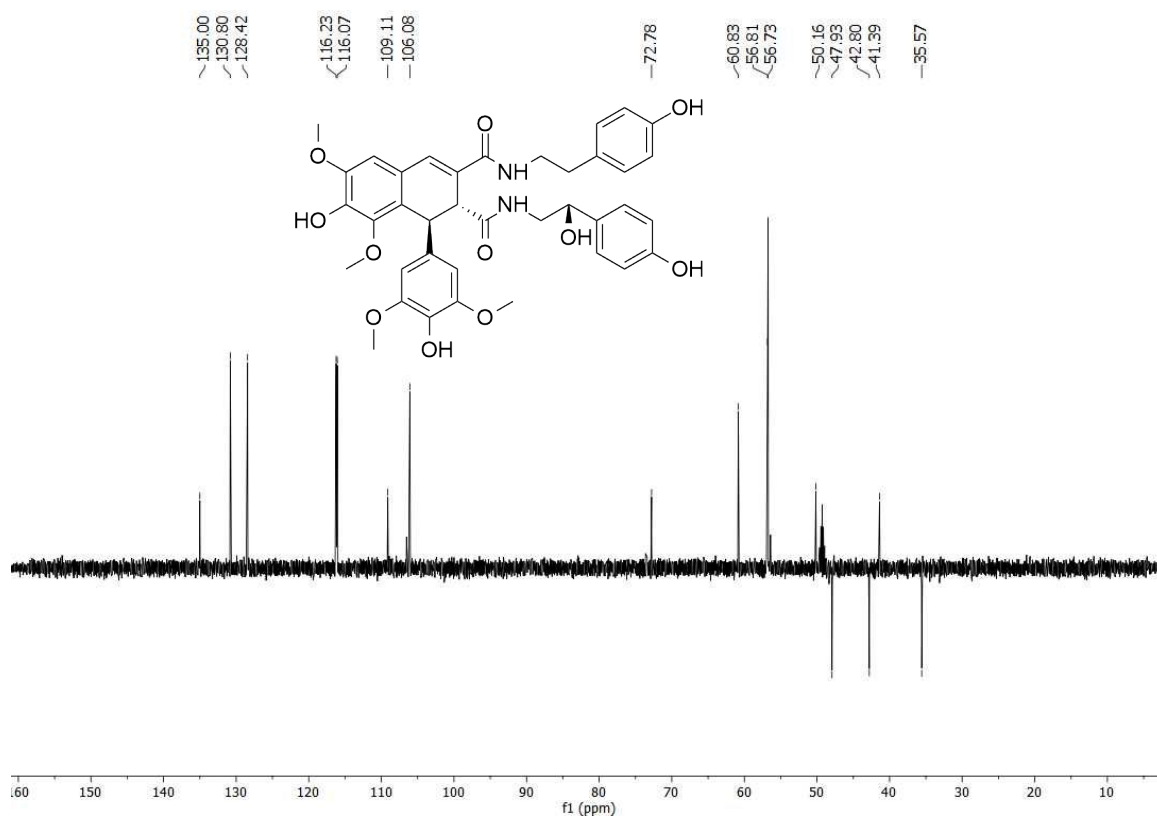

**Figure S47.**  $^{13}\text{C}$ -DEPT135 NMR spectrum of compound **5** (125 MHz, MeOD).

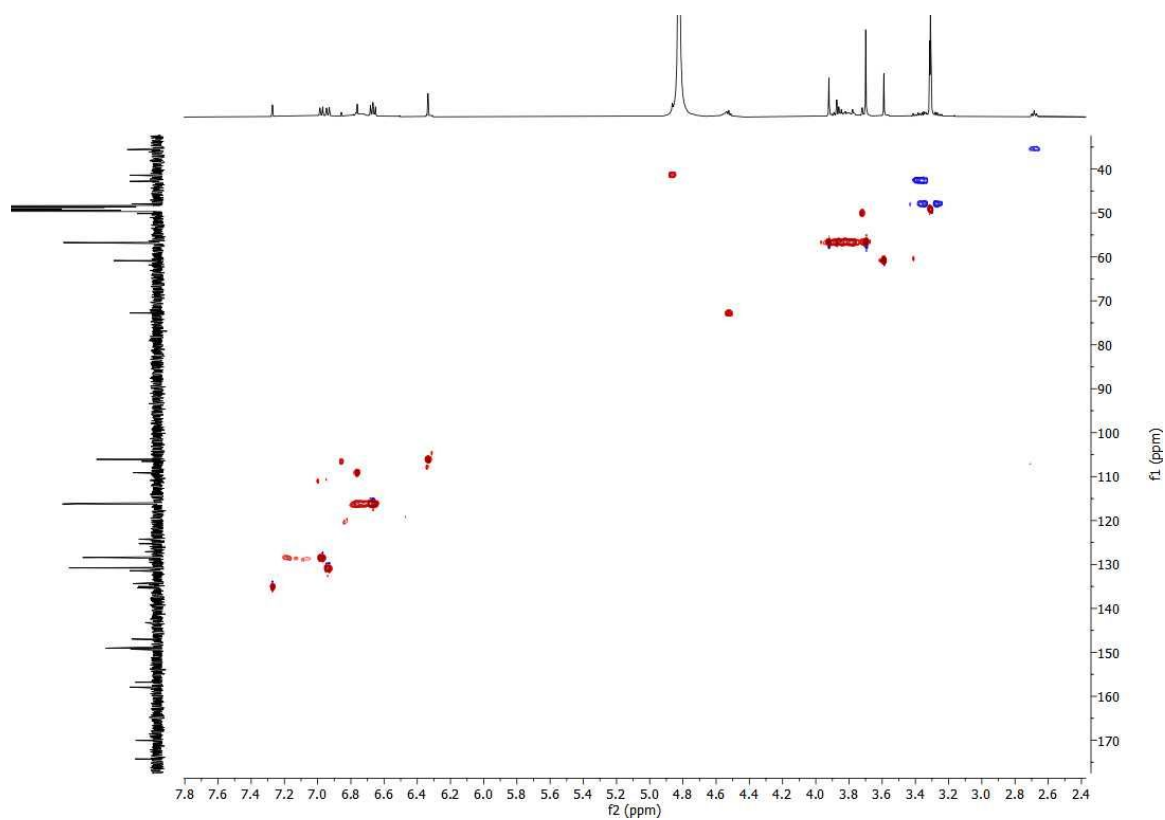

**Figure S48.** HSQC spectrum of compound **5** (500/125 MHz, MeOD).

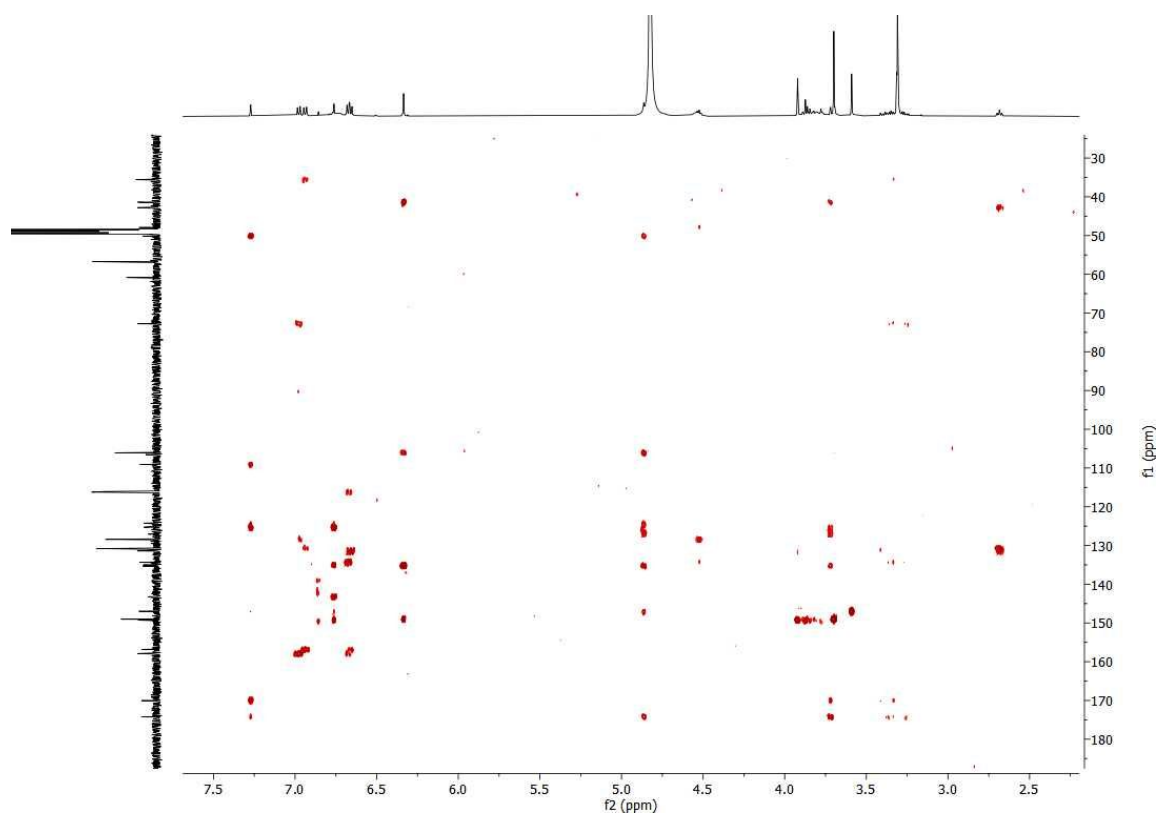

**Figure S49.** HMBC spectrum of compound **5** (500/125 MHz, MeOD).

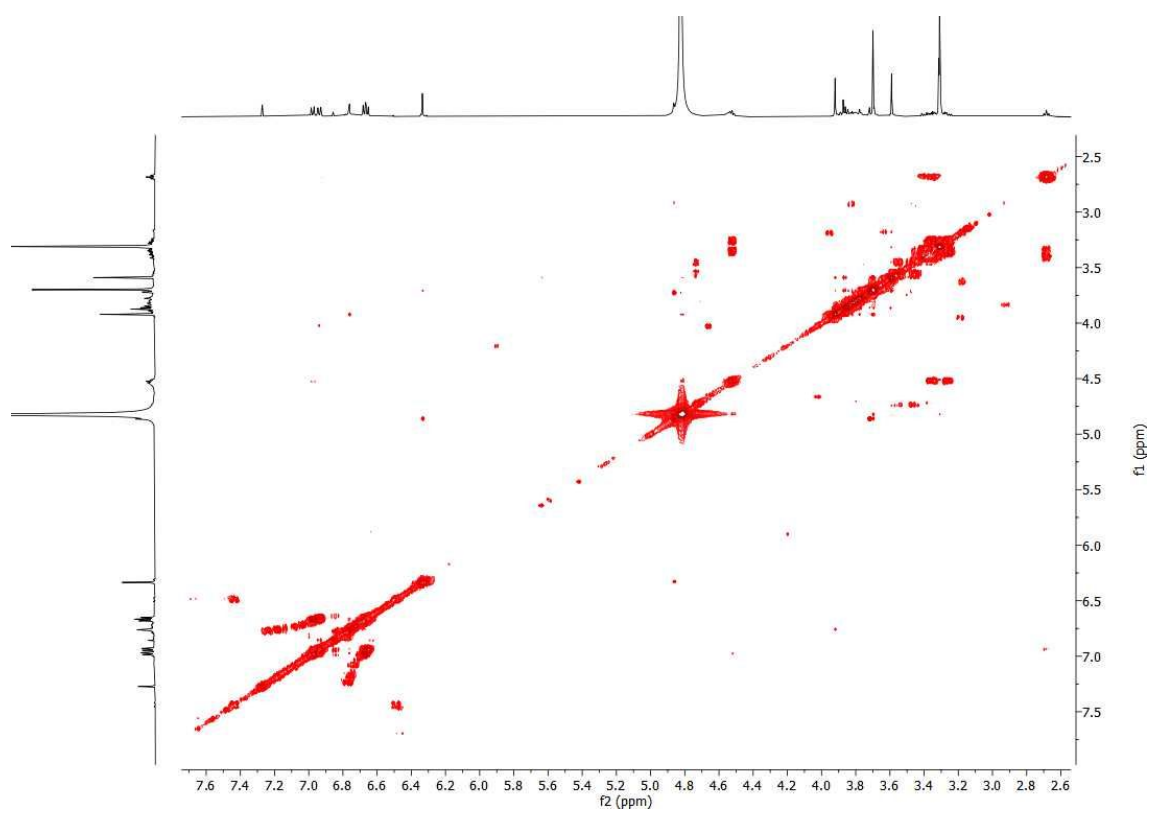

**Figure S50.** COSY spectrum of compound **5** (500 MHz, MeOD).

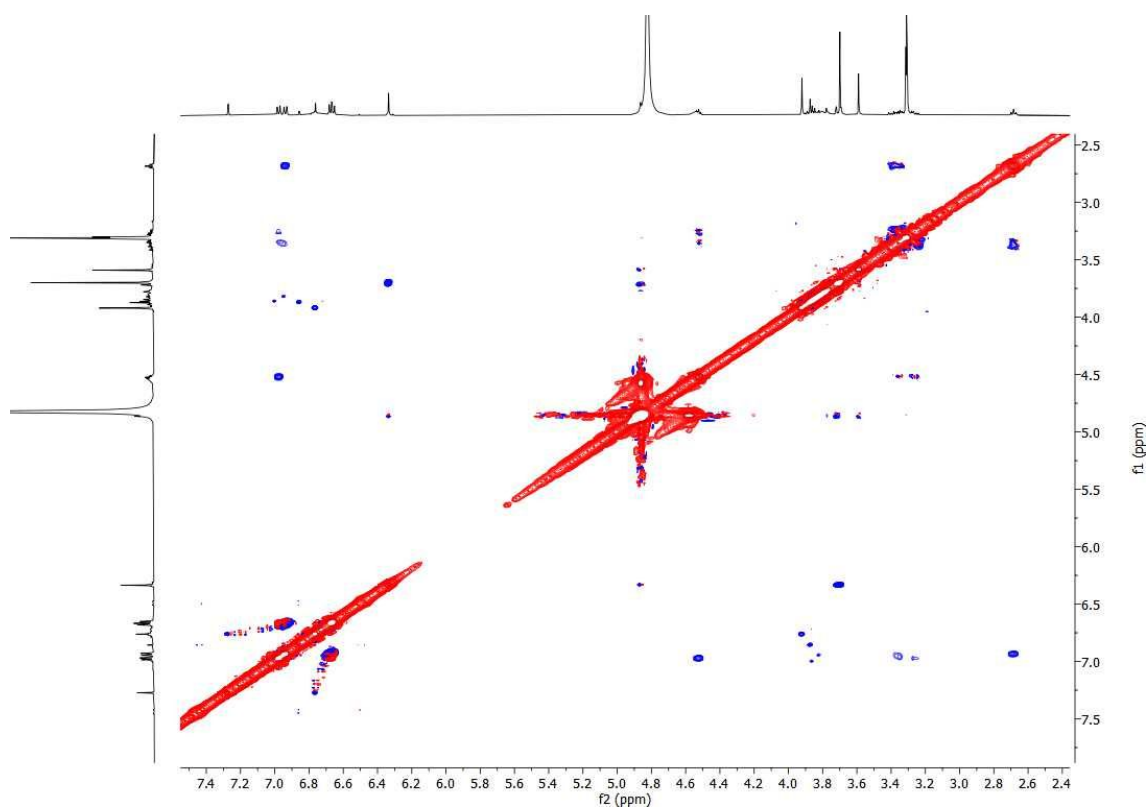

**Figure S51.** NOESY spectrum of compound **5** (500 MHz, MeOD).

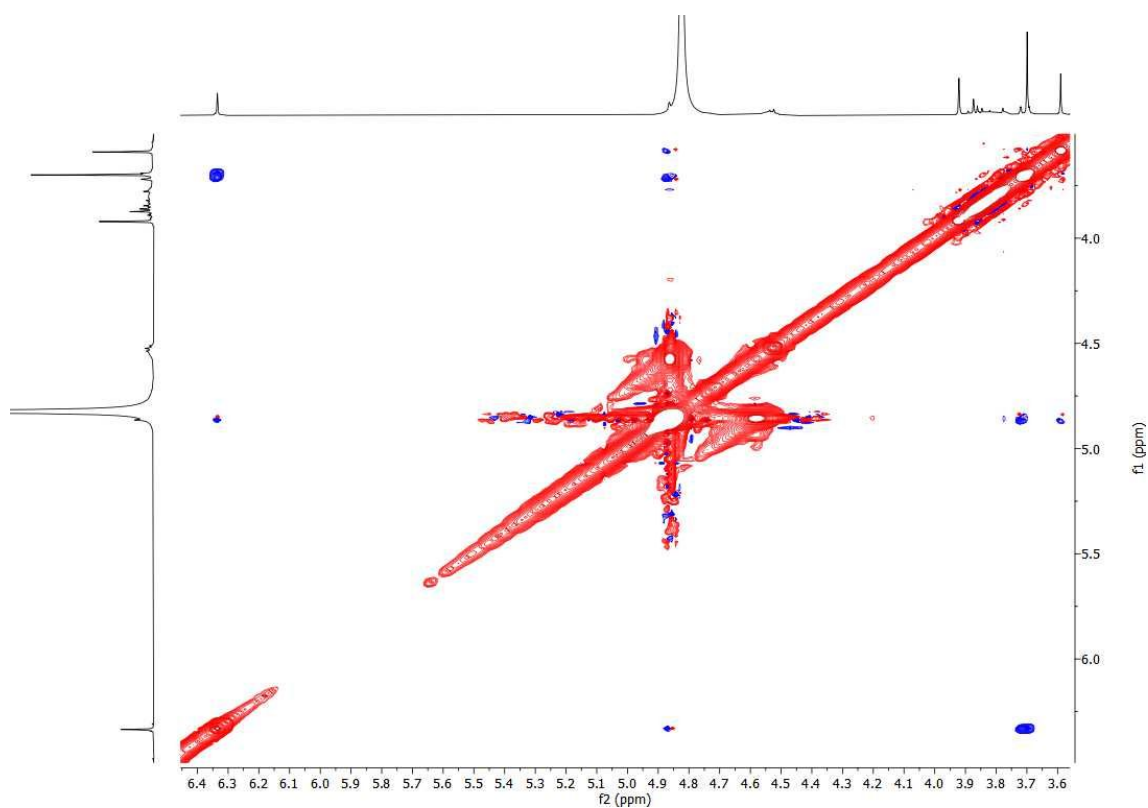

**Figure S52.** Amplification of the NOESY spectrum of compound **5** (500 MHz, MeOD).

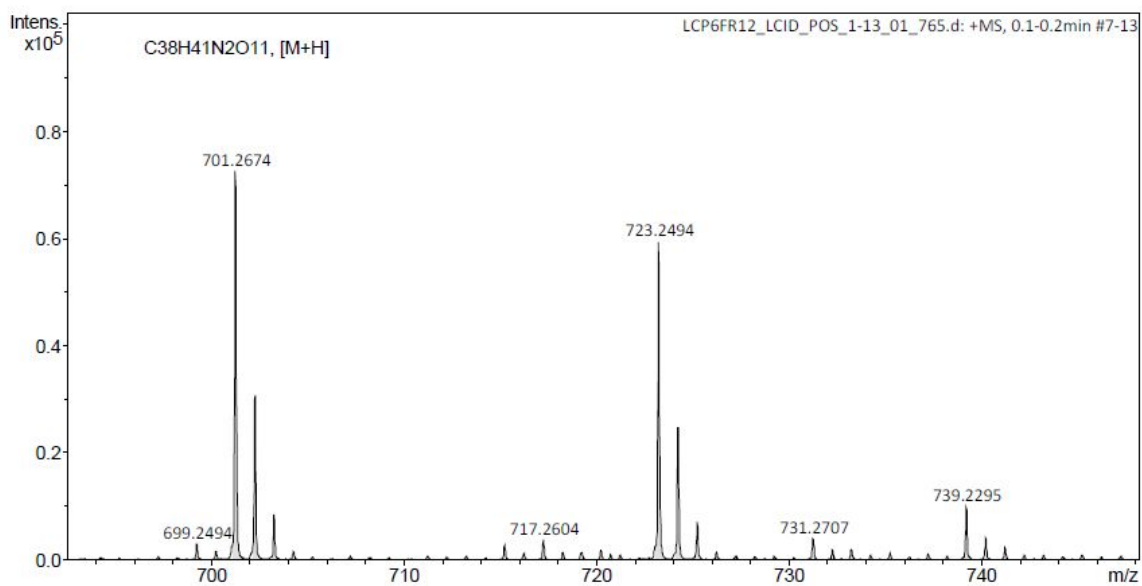

**Figure S53.** HRESIMS spectrum of compound **5** ( $[M + H]^+$ , positive mode).

## 6 Spectroscopic data for compound **6**

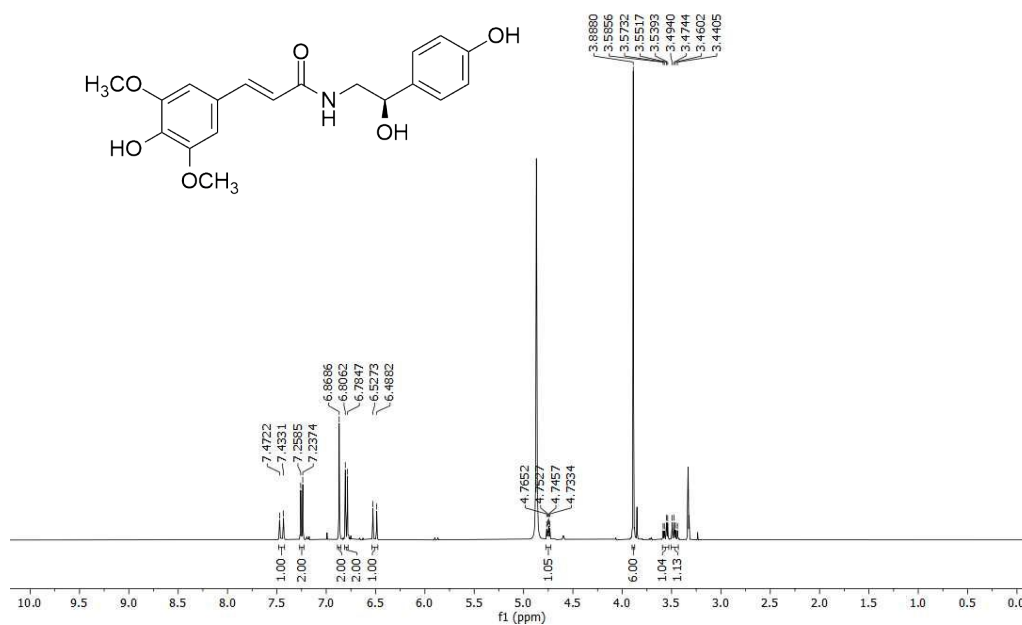

**Figure S54.**  $^1\text{H}$  NMR spectrum of compound **6** (400 MHz, MeOD).

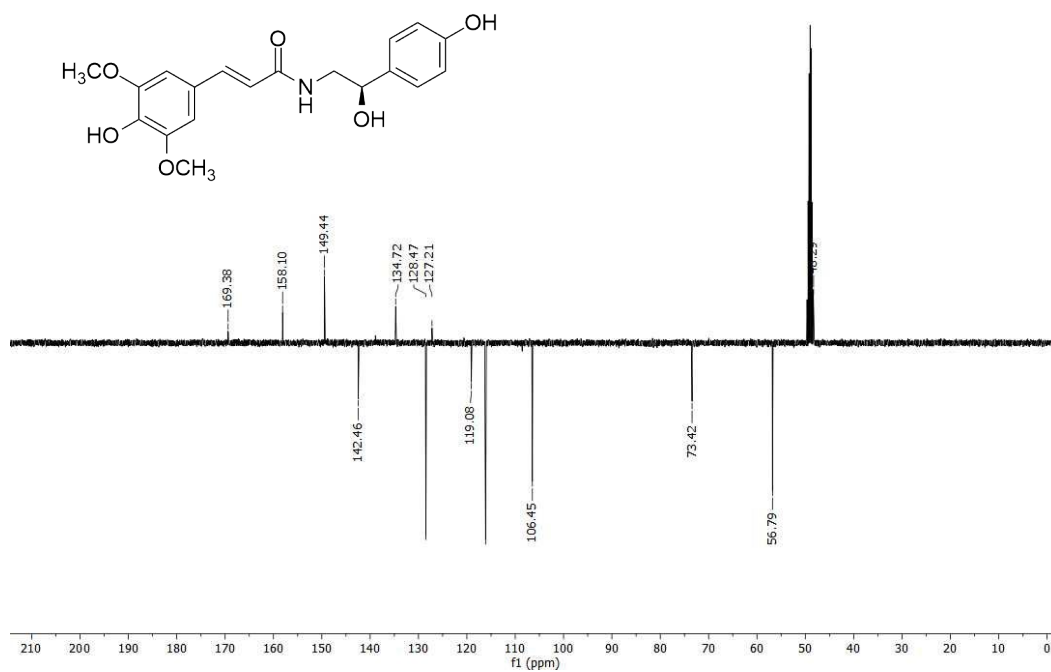

**Figure S55.** <sup>13</sup>C-APT NMR spectrum of compound 6 (100 MHz, MeOD).

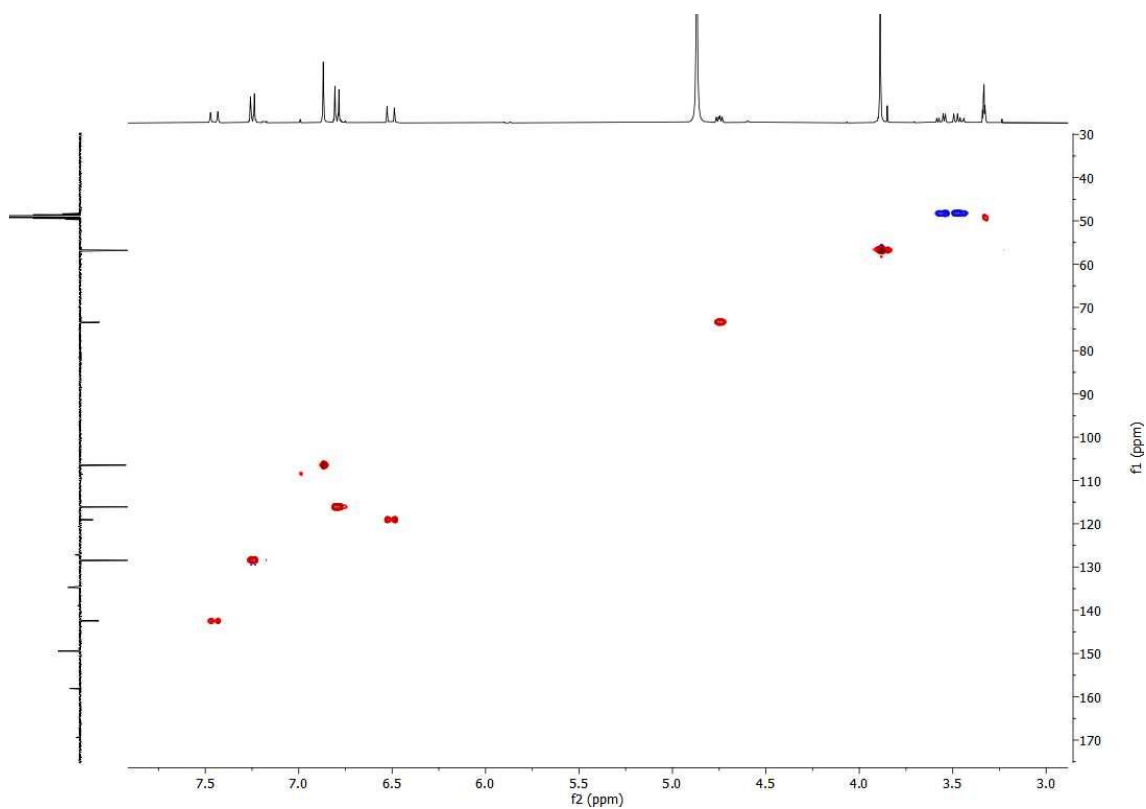

**Figure S56.** HSQC spectrum of compound 6 (400/100 MHz, MeOD).

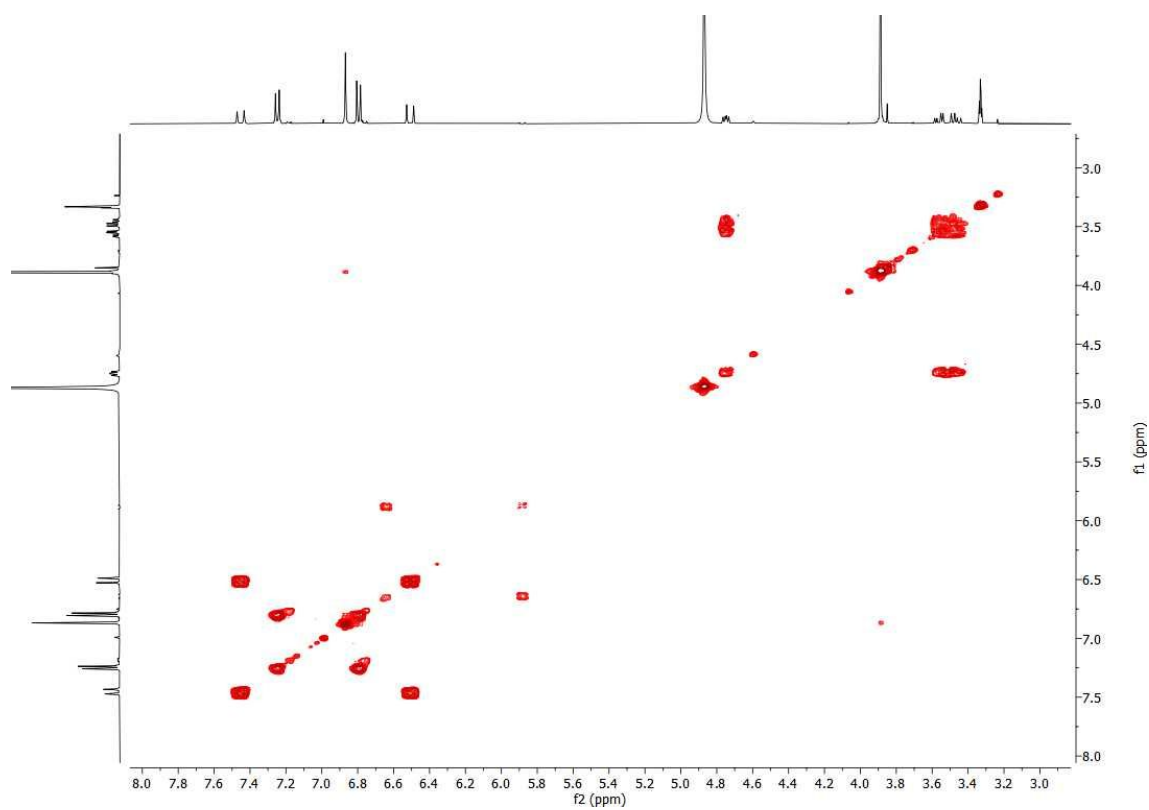

**Figure S57.** COSY spectrum of compound **6** (400 MHz, MeOD).

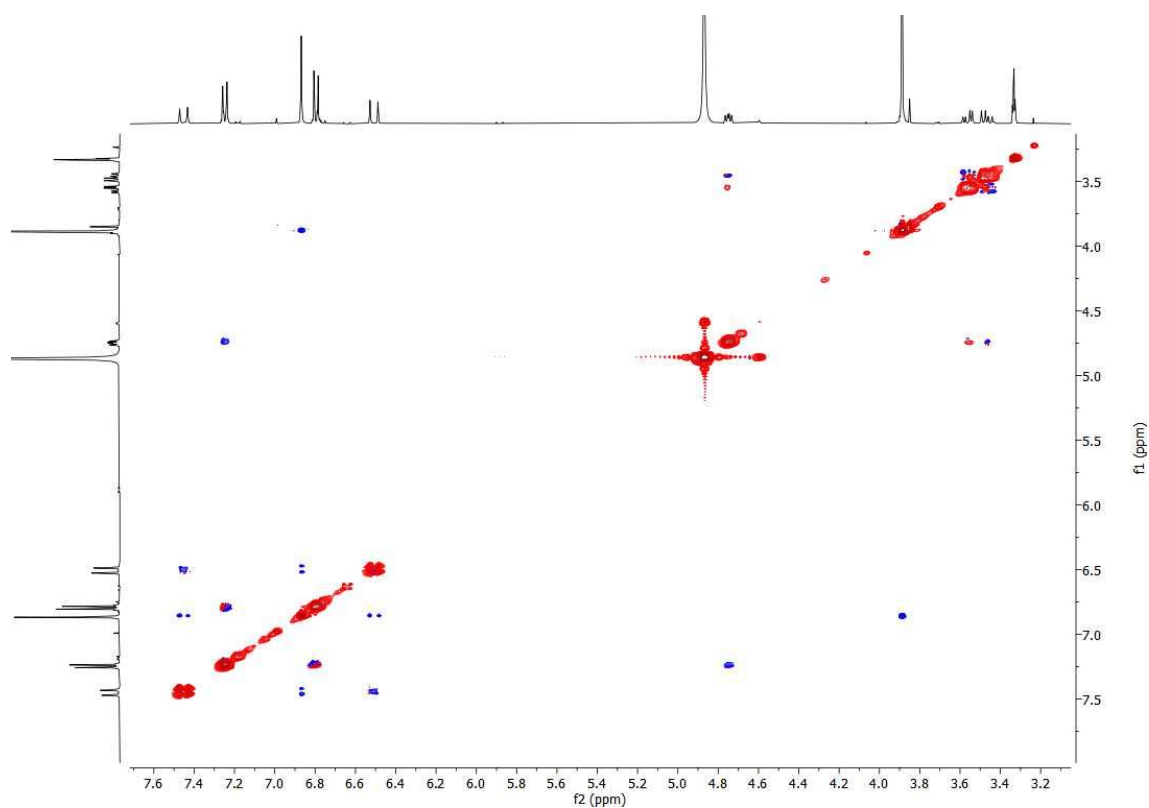

**Figure S58.** NOESY spectrum of compound **6** (400 MHz, MeOD).





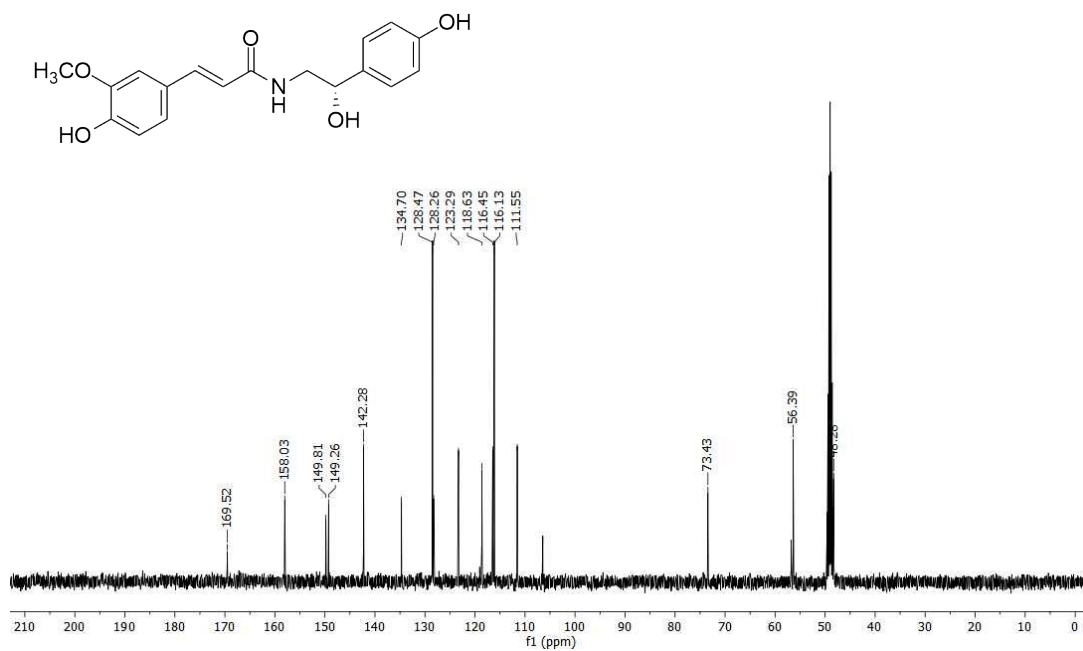

**Figure S61.** <sup>13</sup>C-BB NMR spectrum of compound 7 (100 MHz, MeOD).

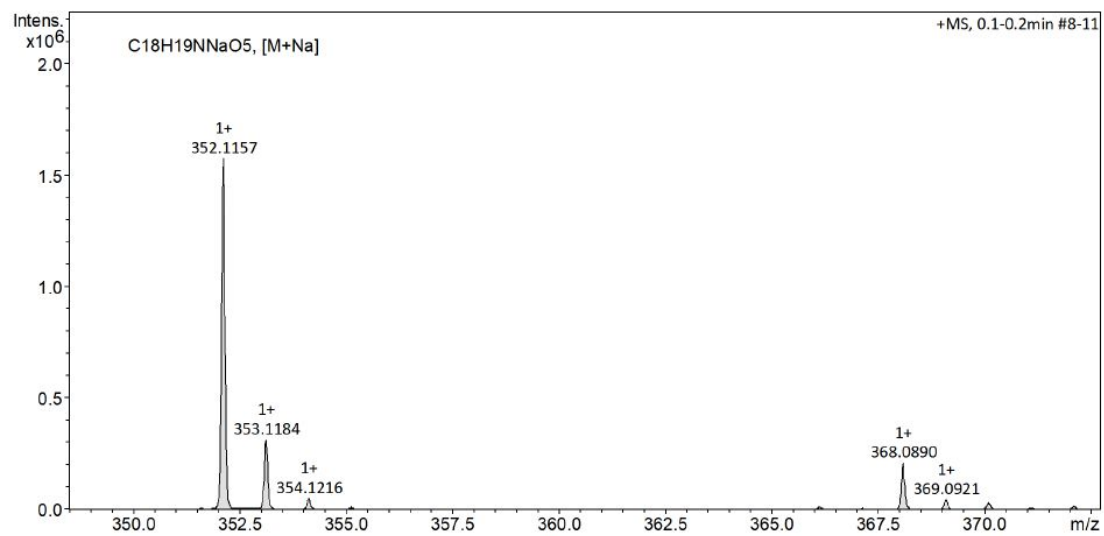

**Figure S62.** HRESIMS spectrum of compound 7 ([M + Na]<sup>+</sup>, positive mode).

## 8 Spectroscopic data for compound 8

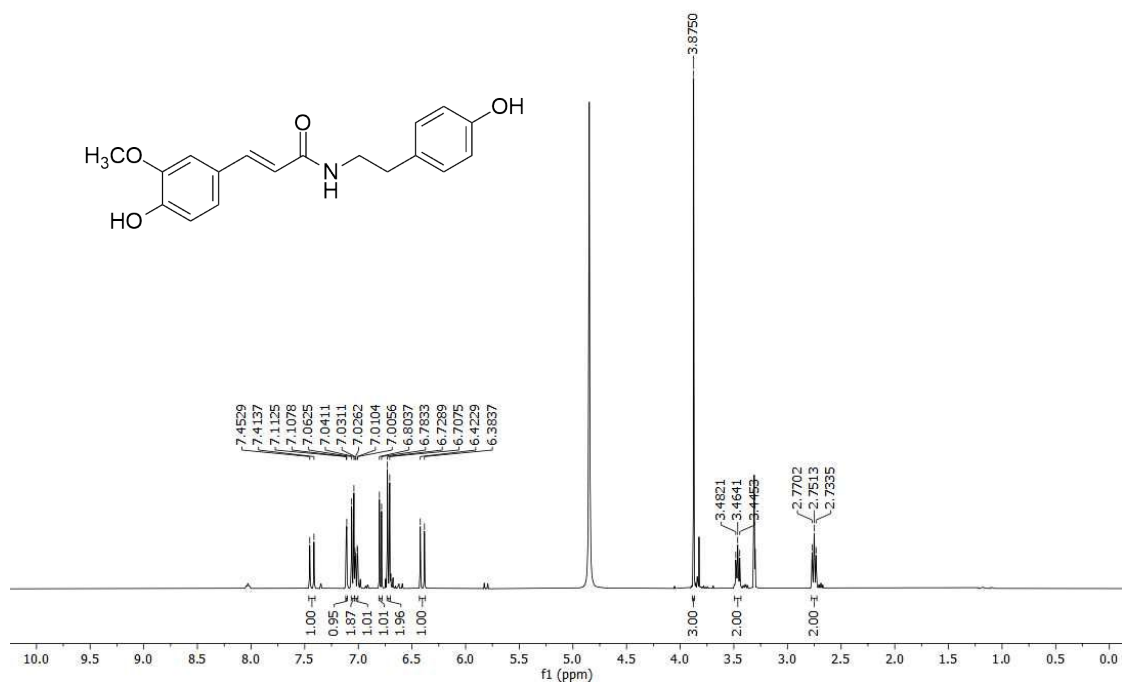

Figure S63. <sup>1</sup>H NMR spectrum of compound 8 (400 MHz, MeOD).

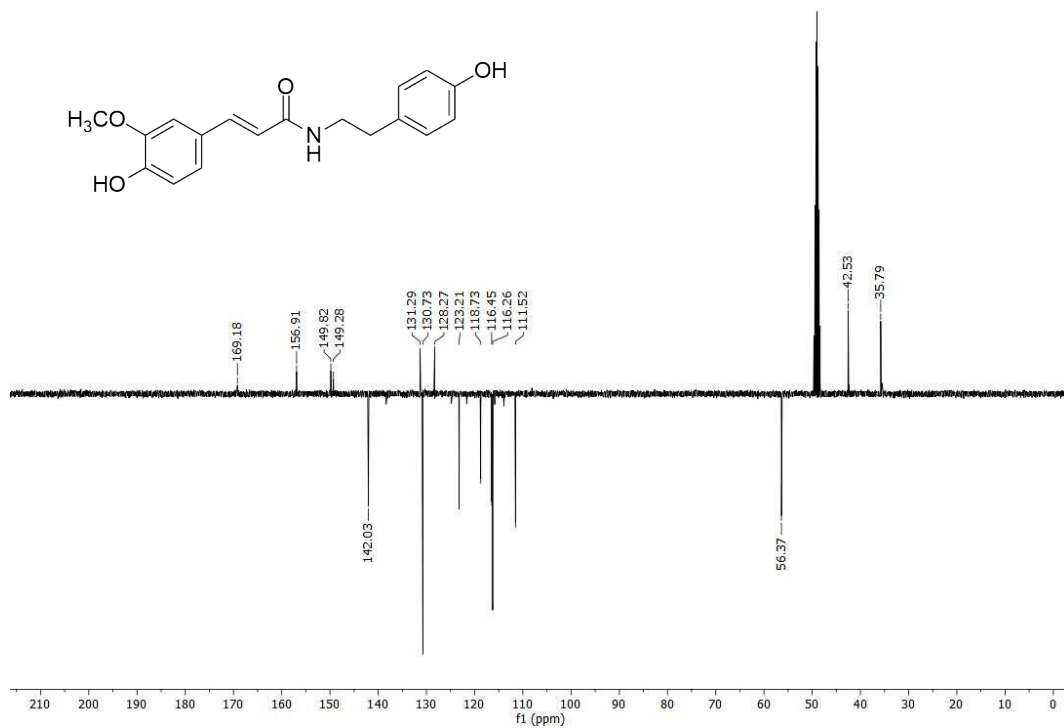

Figure S64. <sup>13</sup>C-APT NMR spectrum of compound 8 (100 MHz, MeOD).

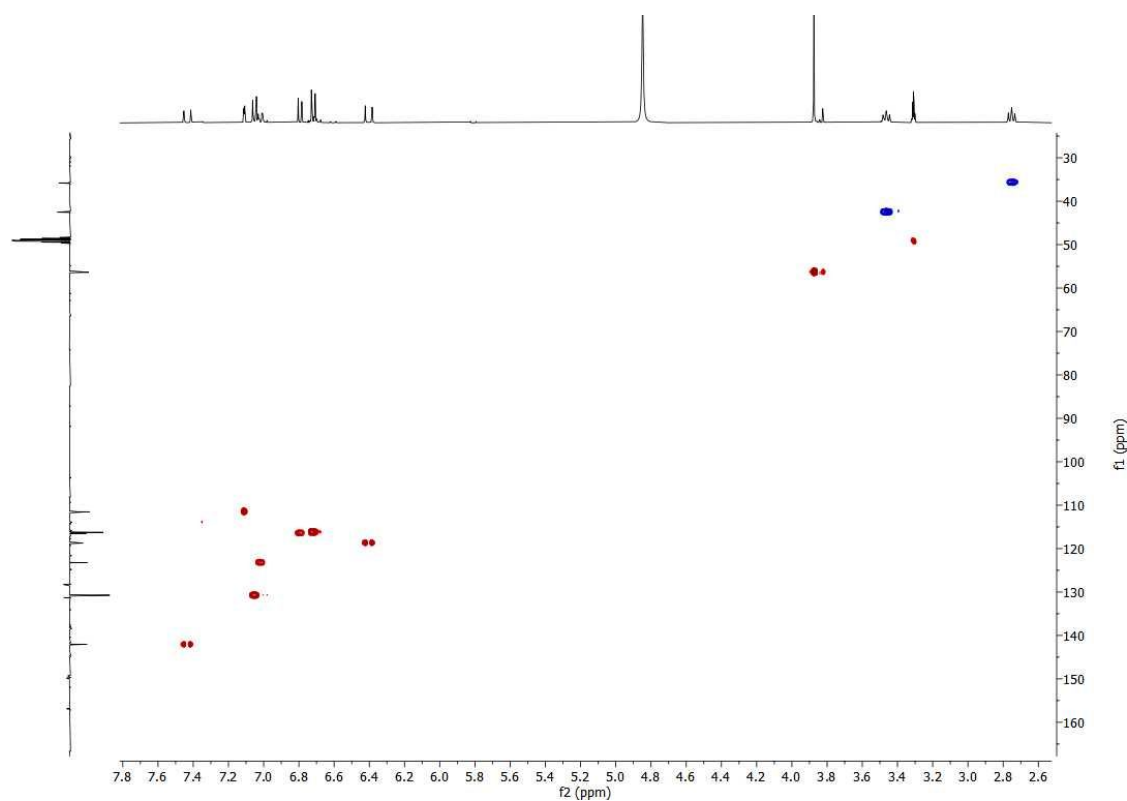

**Figure S65.** HSQC spectrum of compound **8** (400/100 MHz, MeOD).

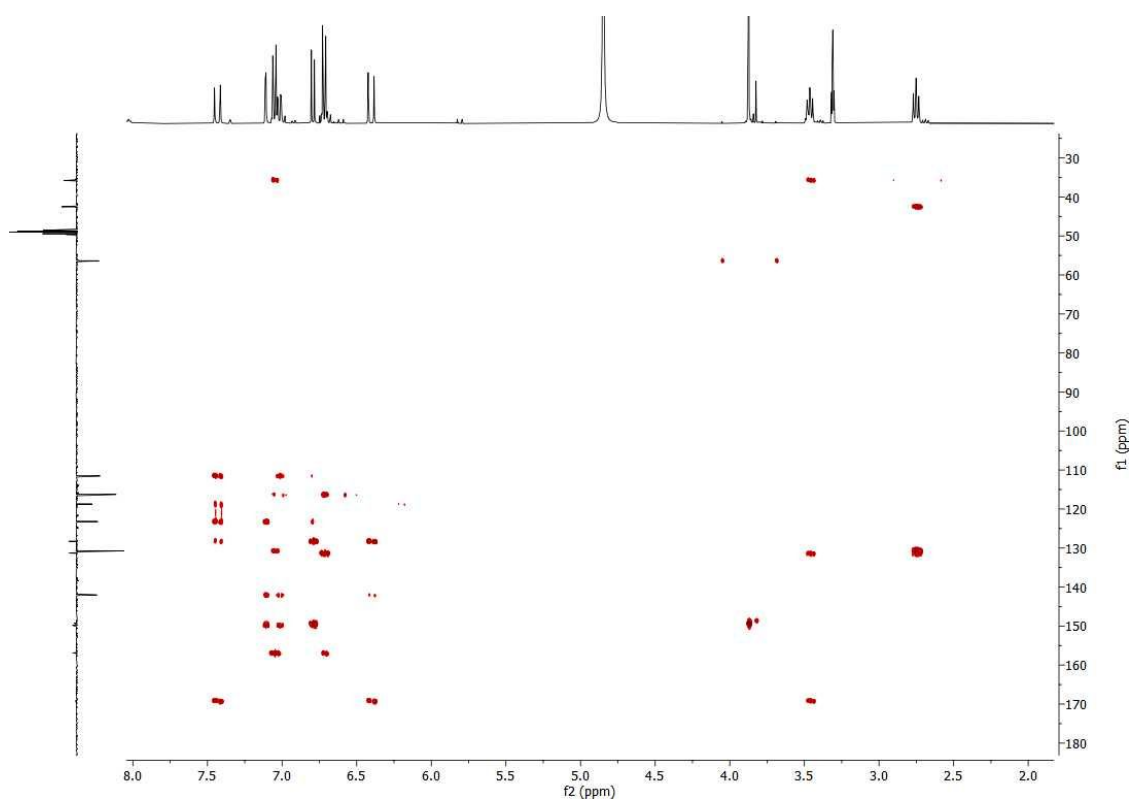

**Figure S66.** HMBC spectrum of compound **8** (400/100 MHz, MeOD).

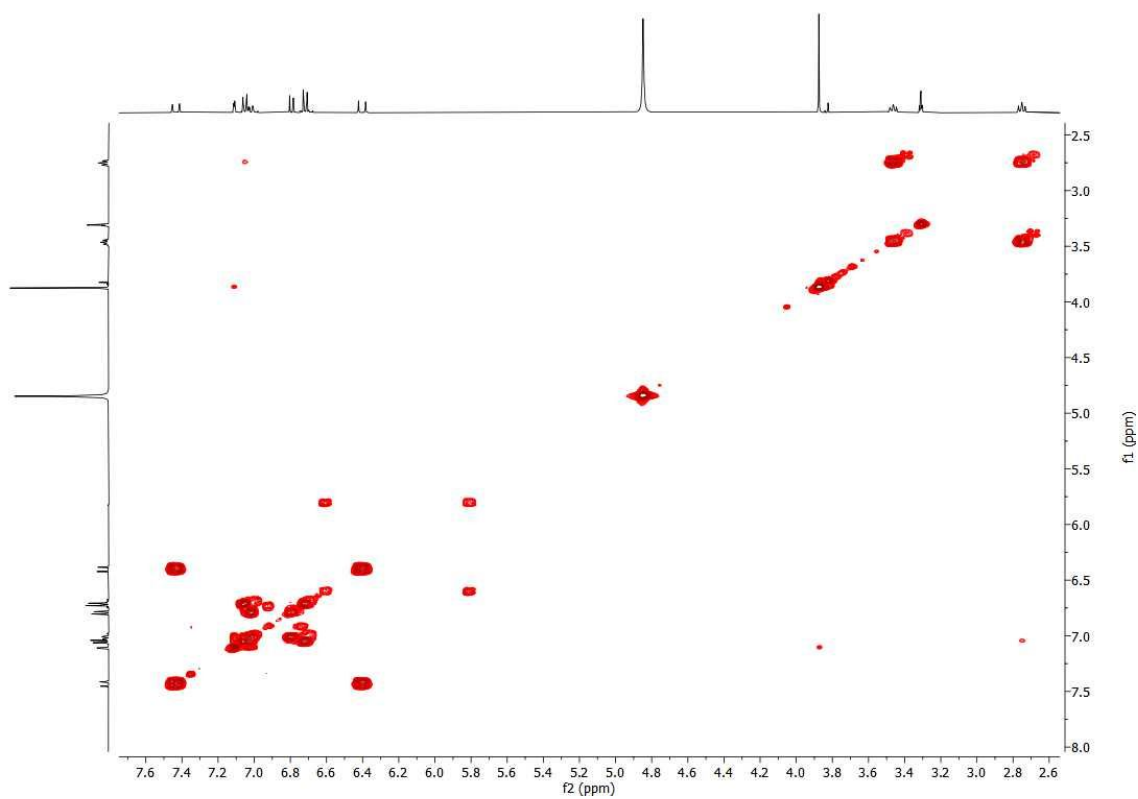

**Figure S67.** COSY spectrum of compound **8** (400 MHz, MeOD).

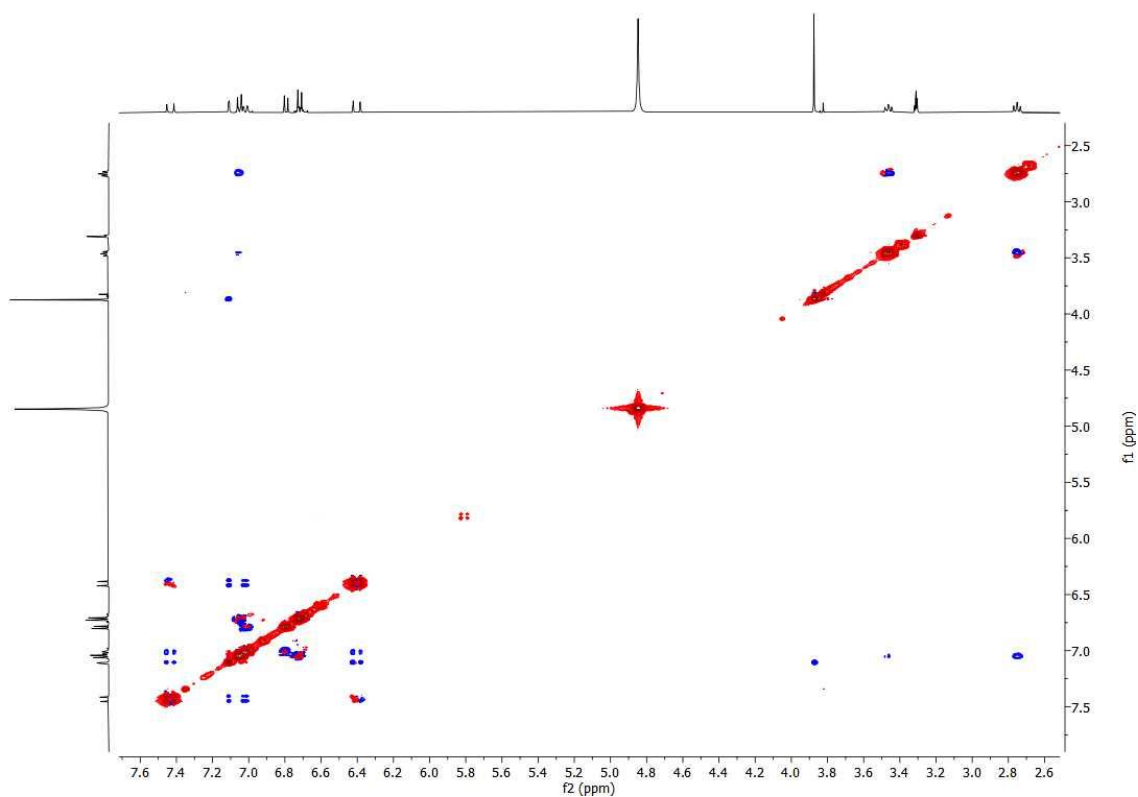

**Figure S68.** NOESY spectrum of compound **8** (400 MHz, MeOD).

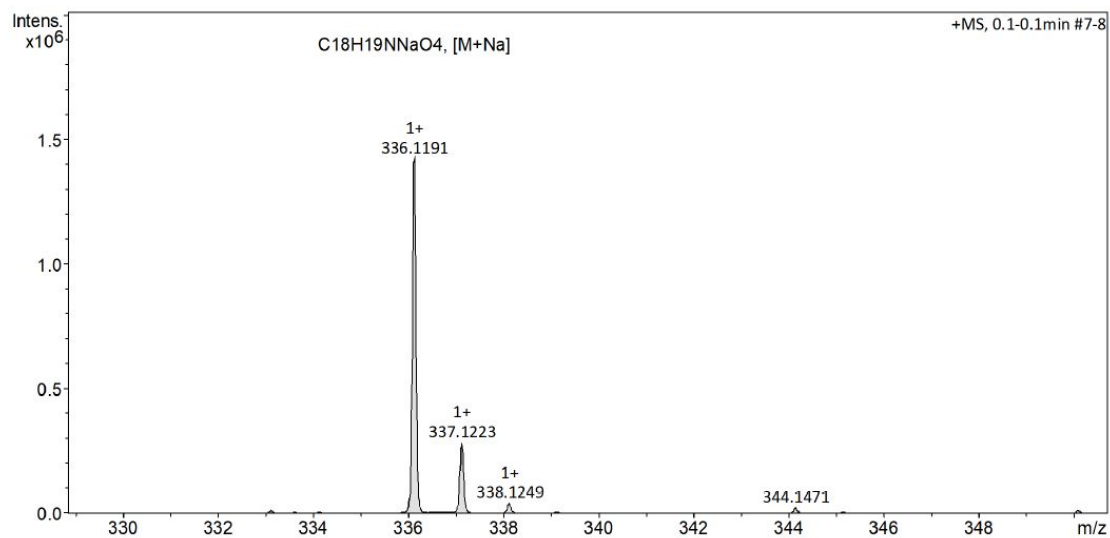

**Figure S69.** HRESIMS spectrum of compound **8** ([M + Na]<sup>+</sup>, positive mode).

## 9 Spectroscopic data for compound **9**

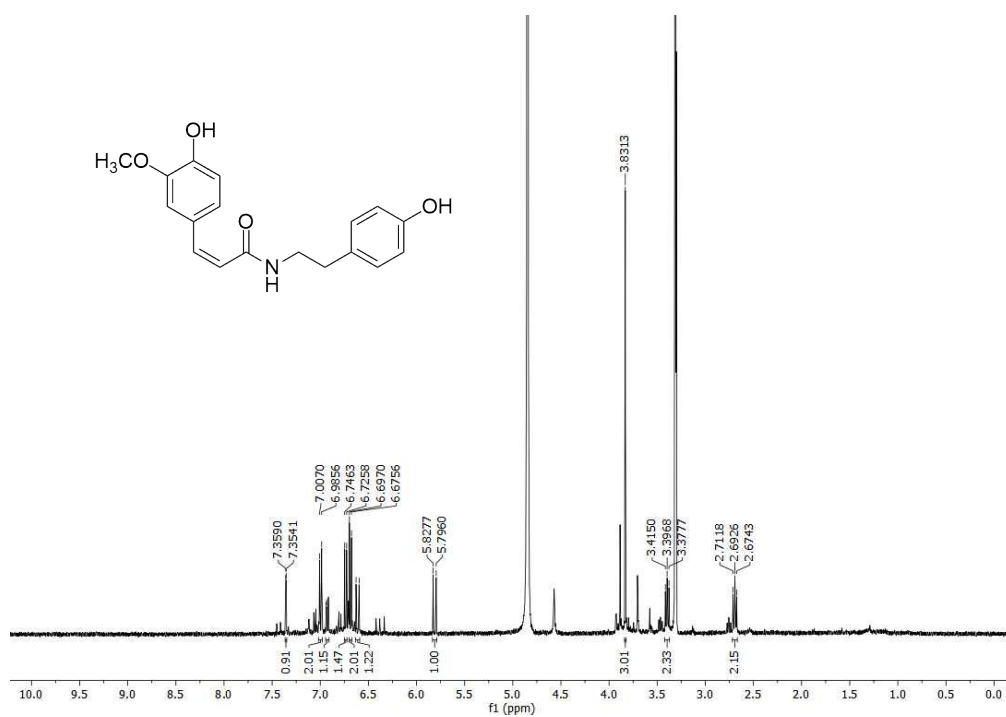

**Figure S70.** <sup>1</sup>H NMR spectrum of compound **9** (400 MHz, MeOD).

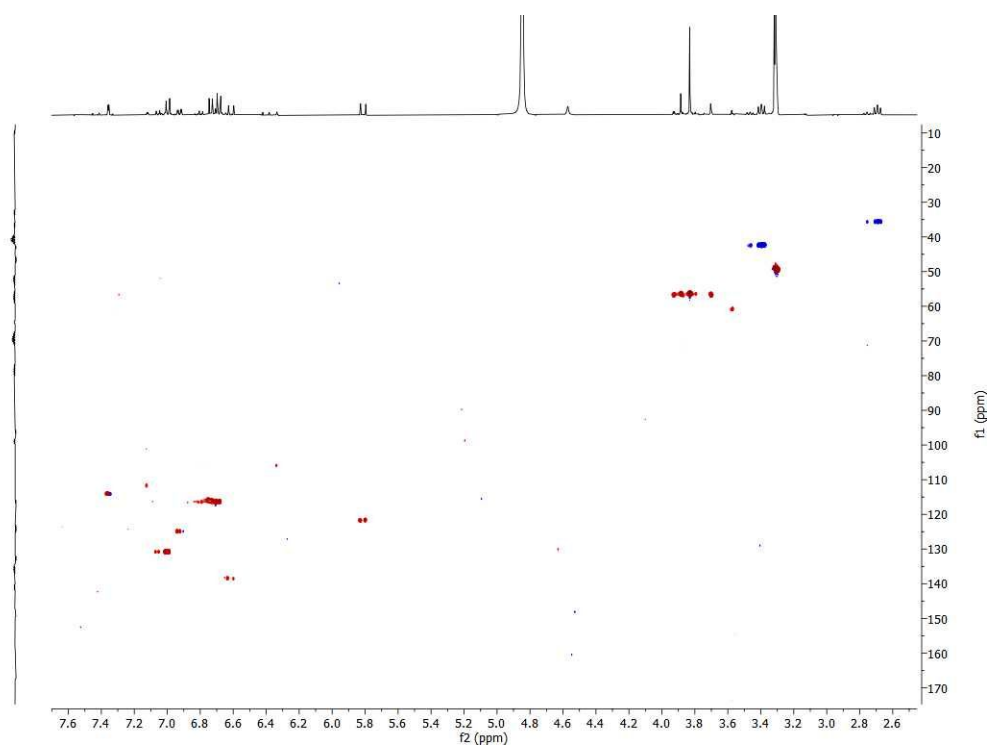

**Figure S71.** HSQC spectrum of compound **9** (400/100 MHz, MeOD).

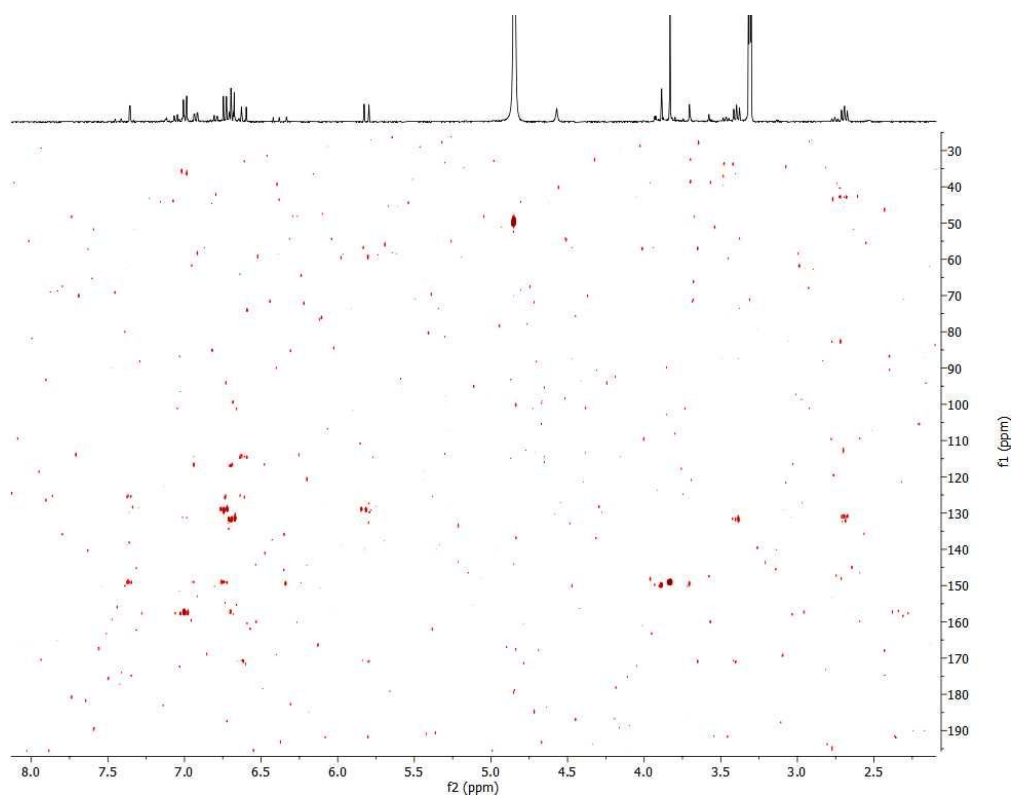

**Figure S72.** HMBC spectrum of compound **9** (400/100 MHz, MeOD).

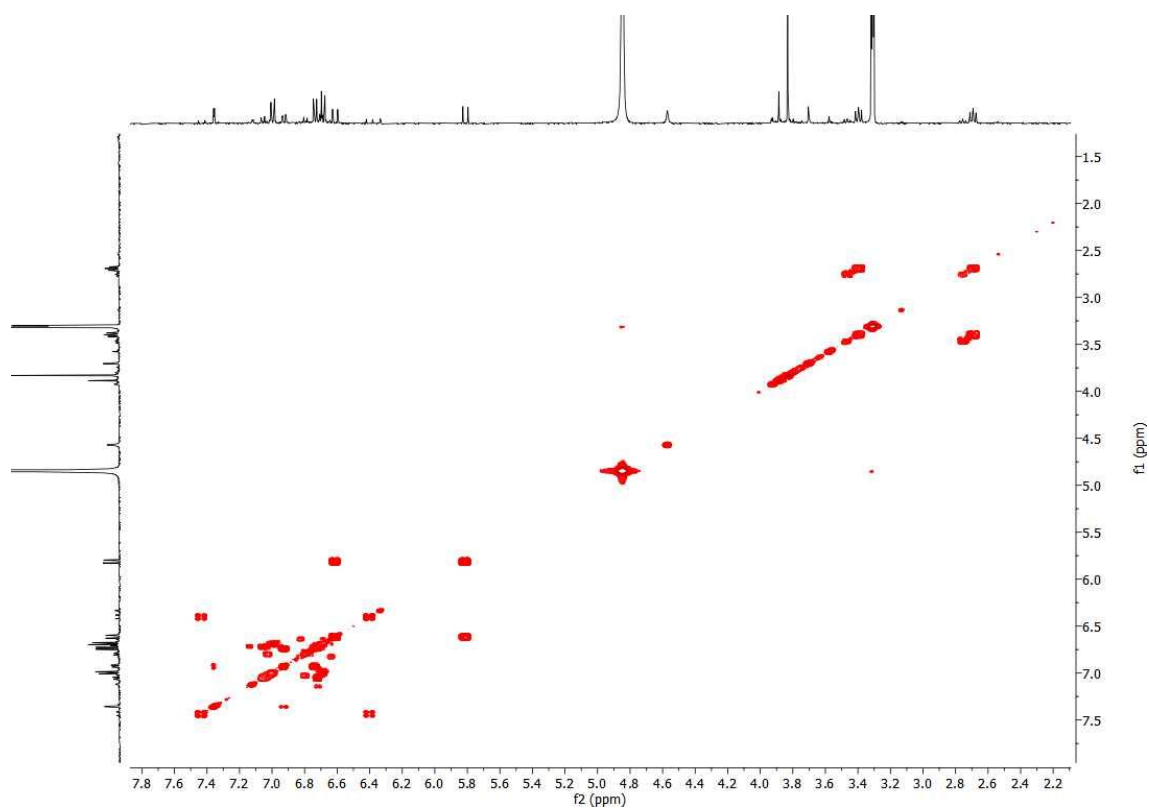

**Figure S73.** COSY spectrum of compound **9** (400 MHz, MeOD).

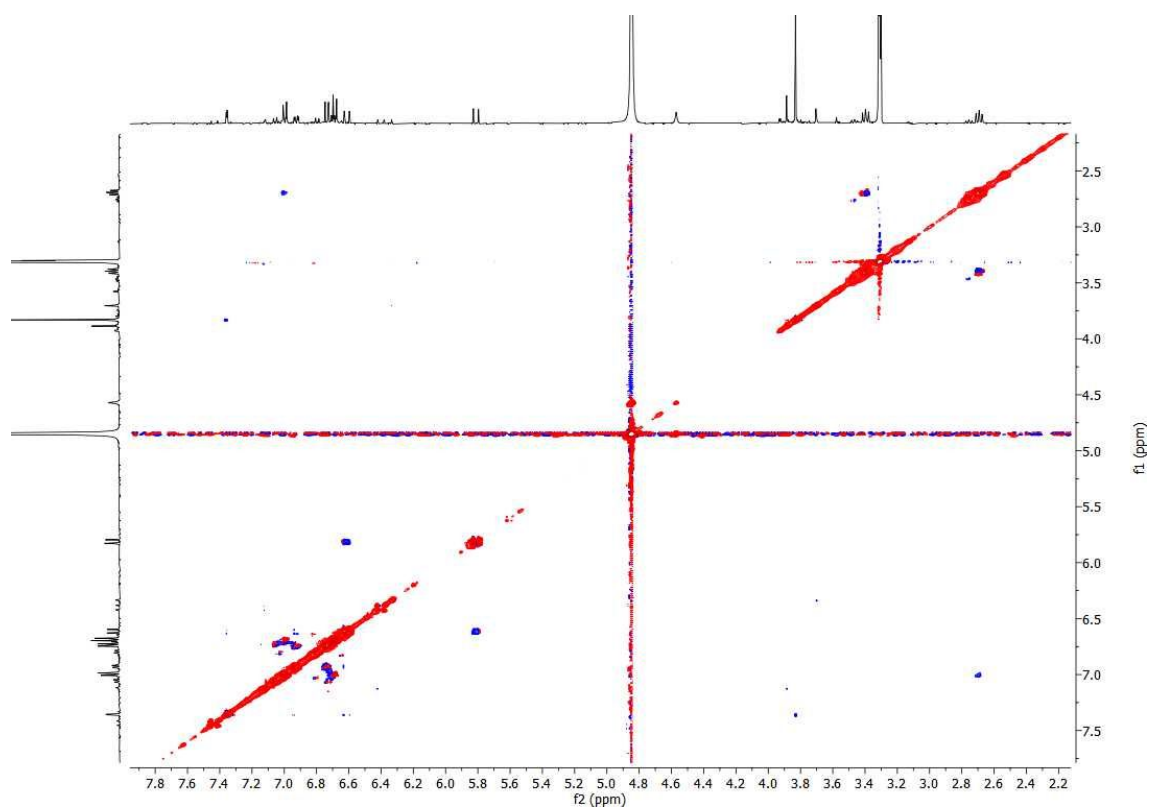

**Figure S74.** NOESY spectrum of compound **9** (400 MHz, MeOD).

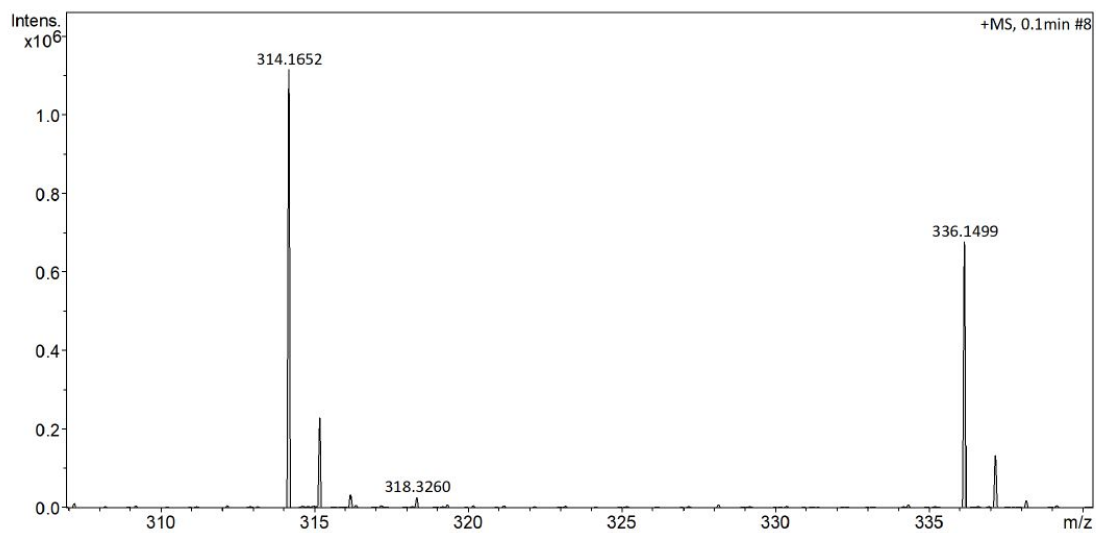

**Figure S75.** HRESIMS spectrum of compound 9 ( $[M + H]^+$ , positive mode).

## 10 Spectroscopic data for compound 10

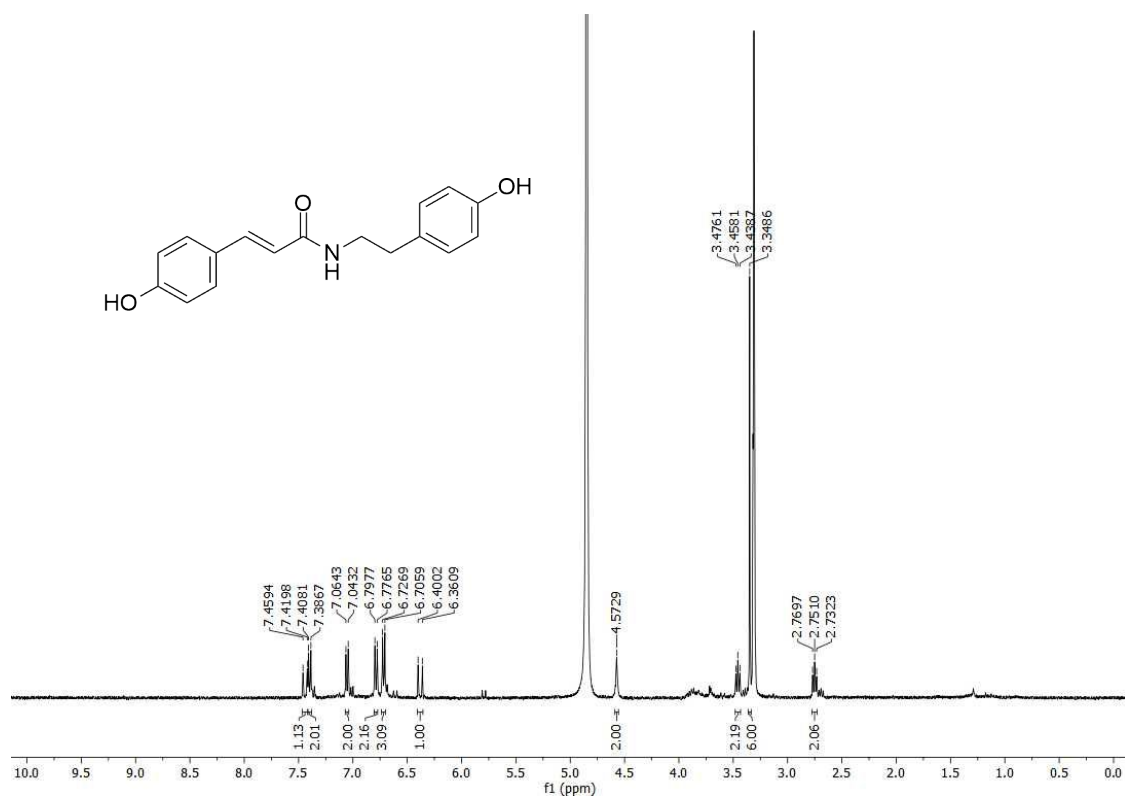

**Figure S78.** <sup>1</sup>H NMR spectrum of compound 10 (400 MHz, MeOD).



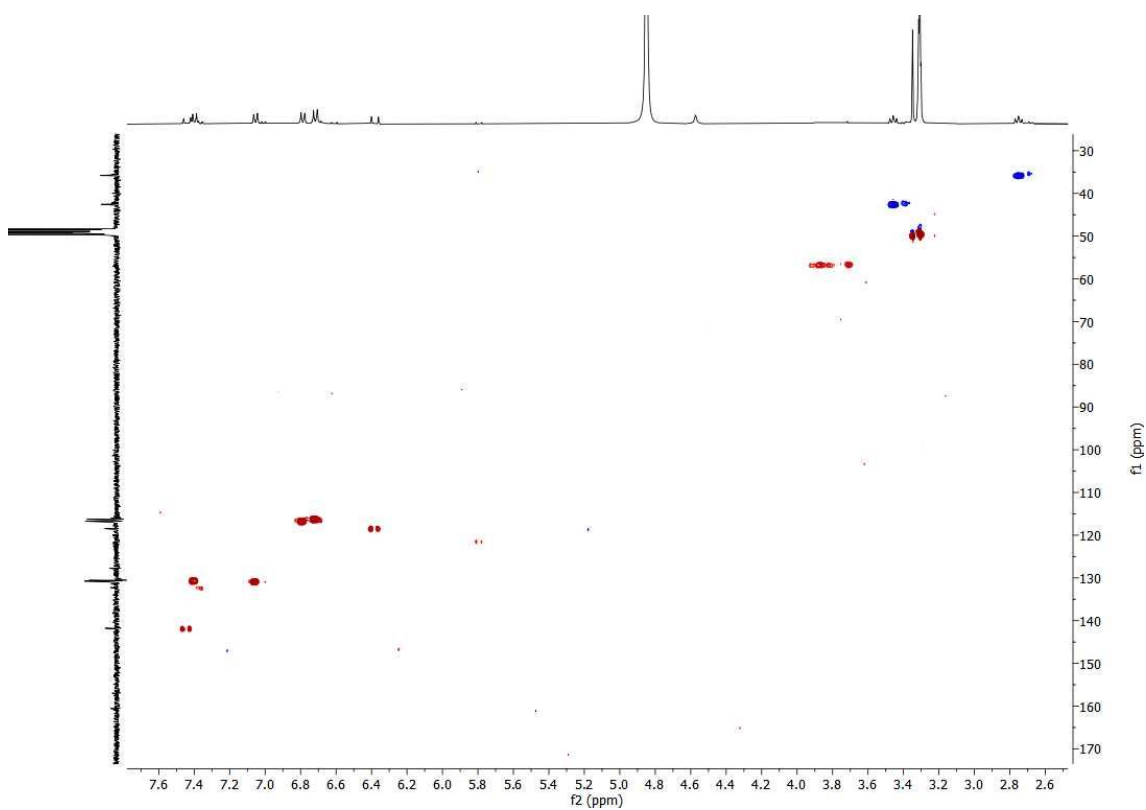

**Figure S76.** HSQC spectrum of compound **10** (400/100 MHz, MeOD).

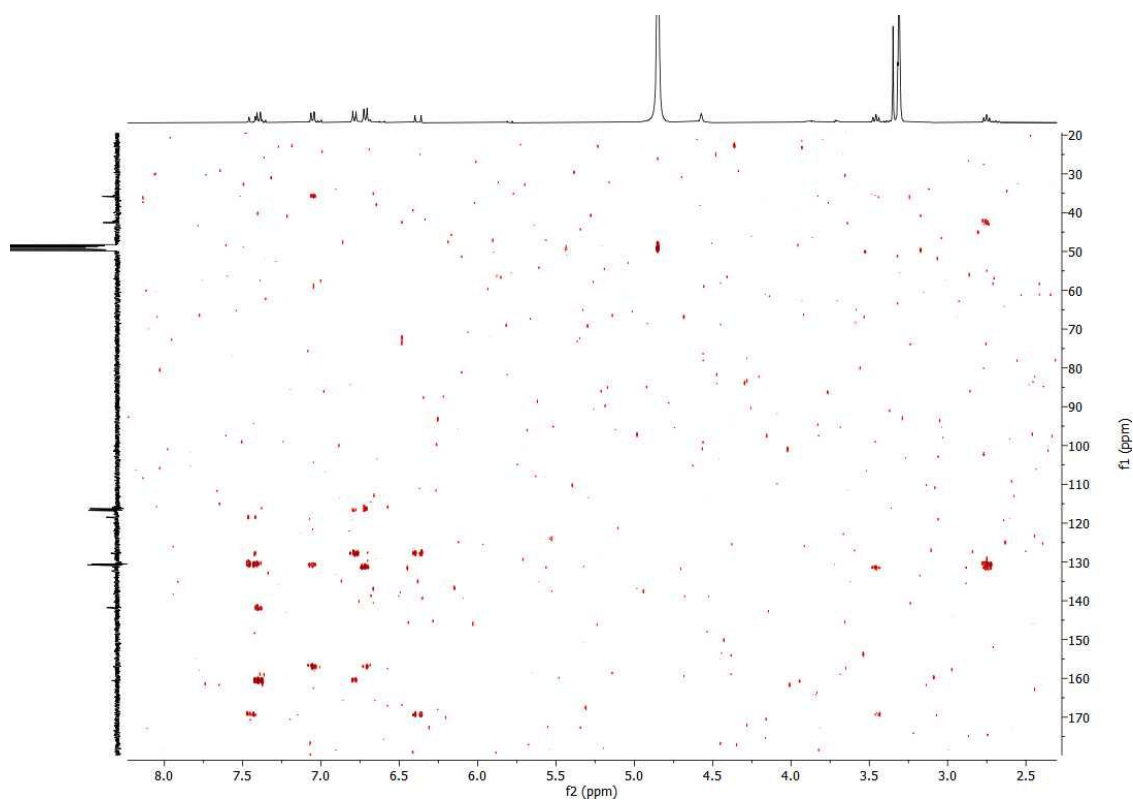

**Figure S77.** HMBC spectrum of compound **10** (400/100 MHz, MeOD).

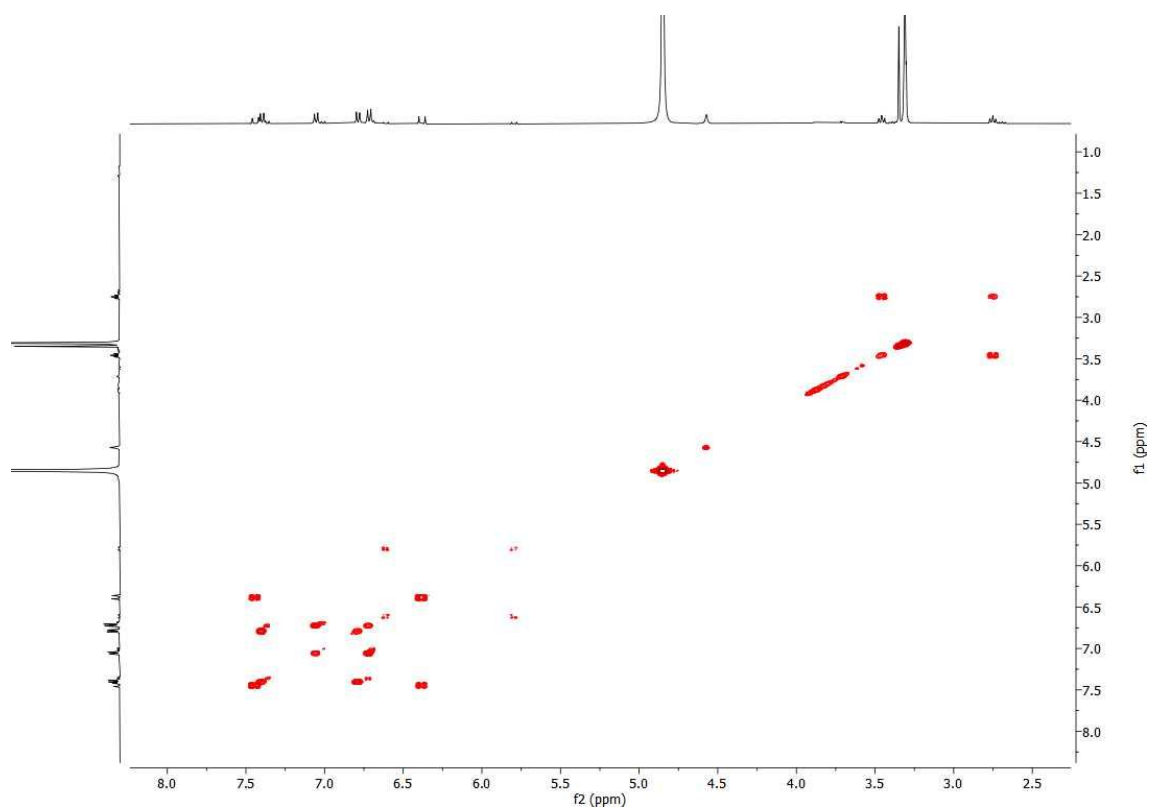

**Figure S78.** COSY spectrum of compound **10** (400 MHz, MeOD).

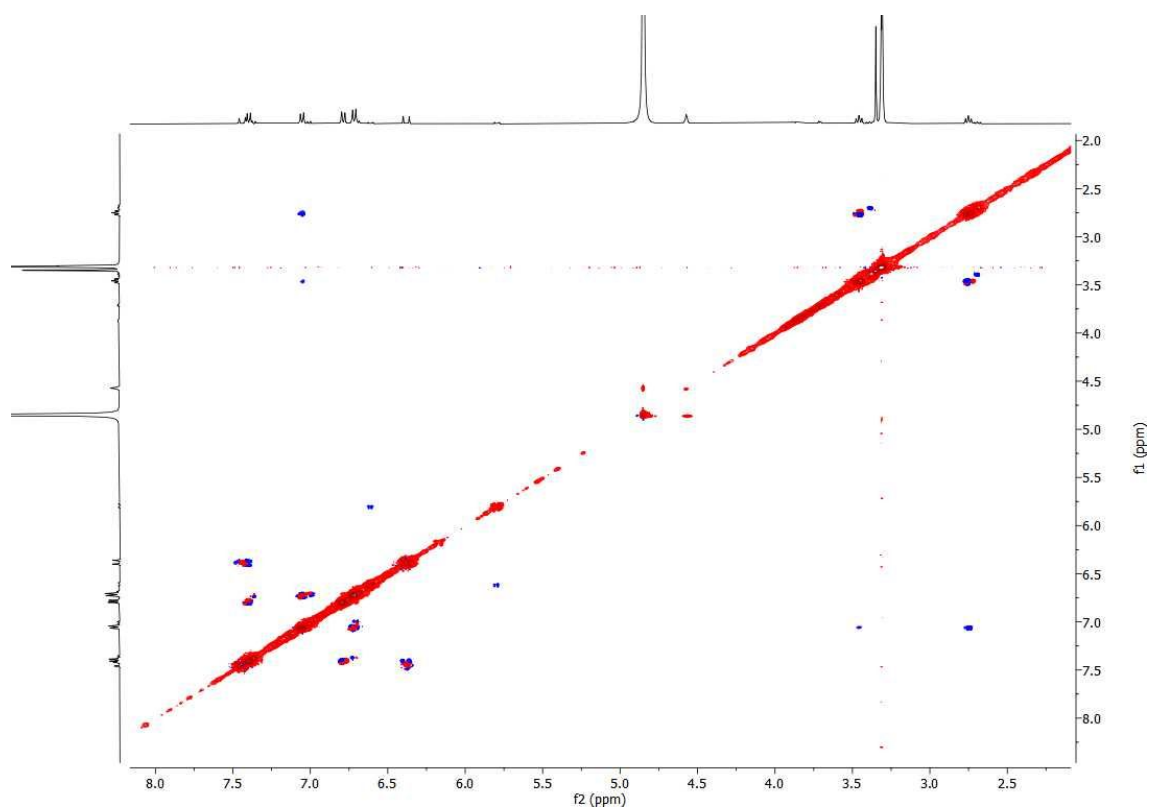

**Figure S79.** NOESY spectrum of compound **10** (400 MHz, MeOD).

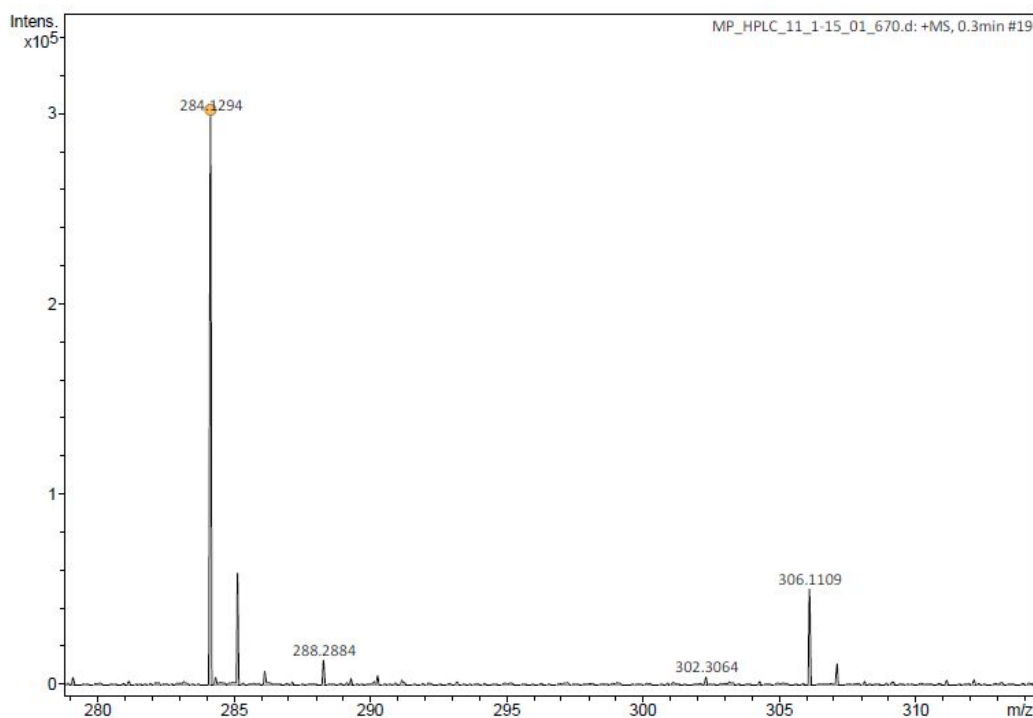

**Figure S80.** HRESIMS spectrum of compound **10** ( $[M + H]^+$ , positive mode).

## 11 Spectroscopic data for compounds **11,12**

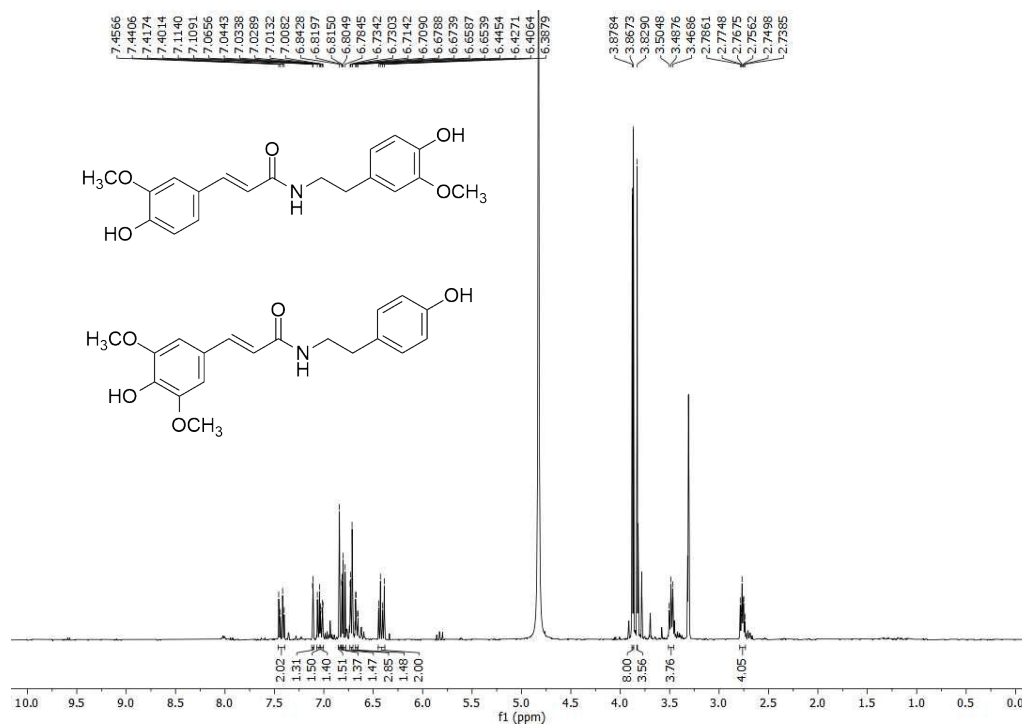

**Figure S81.**  $^1\text{H}$  NMR spectrum of compound **11, 12** (400 MHz, MeOD).

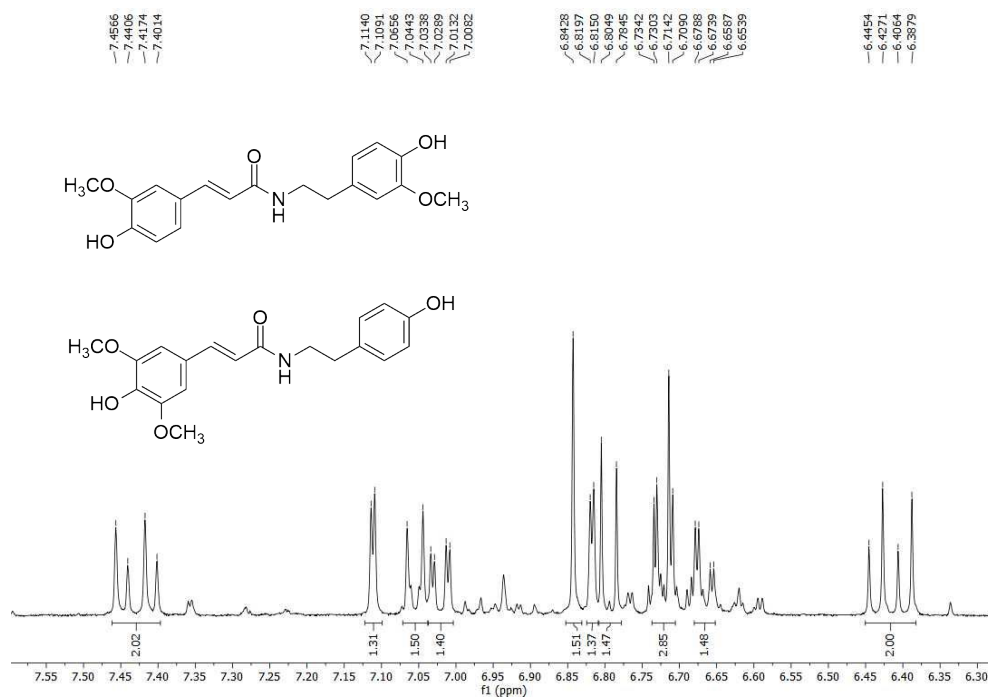

**Figure S82.** Amplification of the  $^1\text{H}$  NMR spectrum of compound 11, 12 (400 MHz, MeOD).

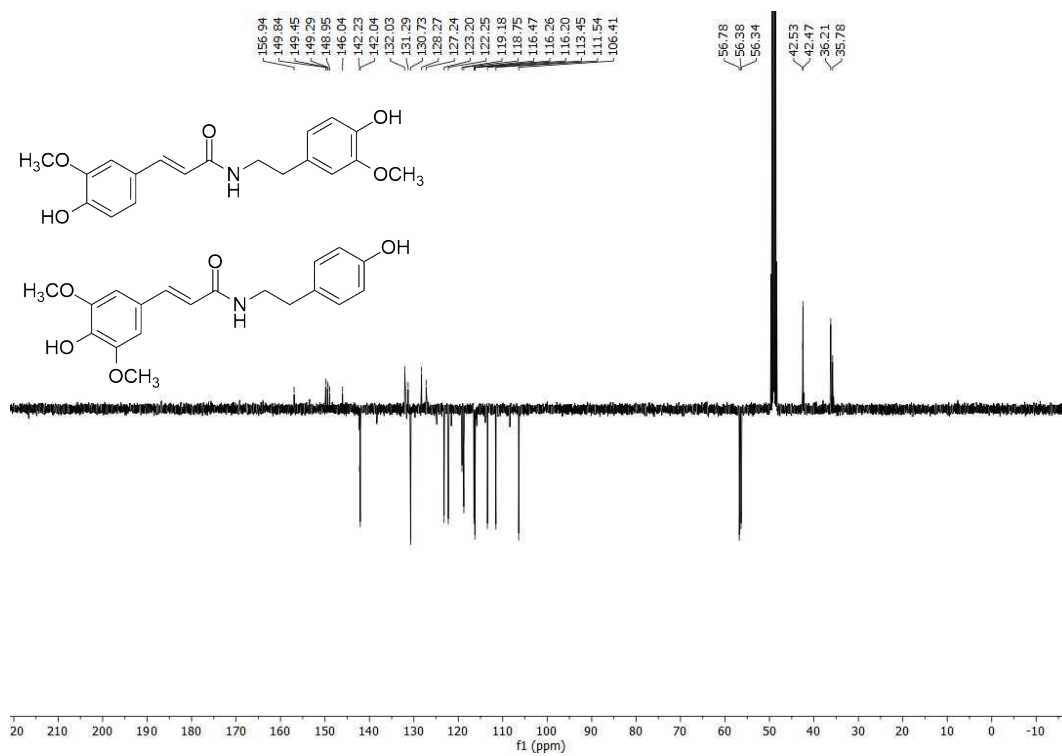

**Figure S83.**  $^{13}\text{C}$ -APT NMR spectrum of compound 11, 12 (100 MHz, MeOD).

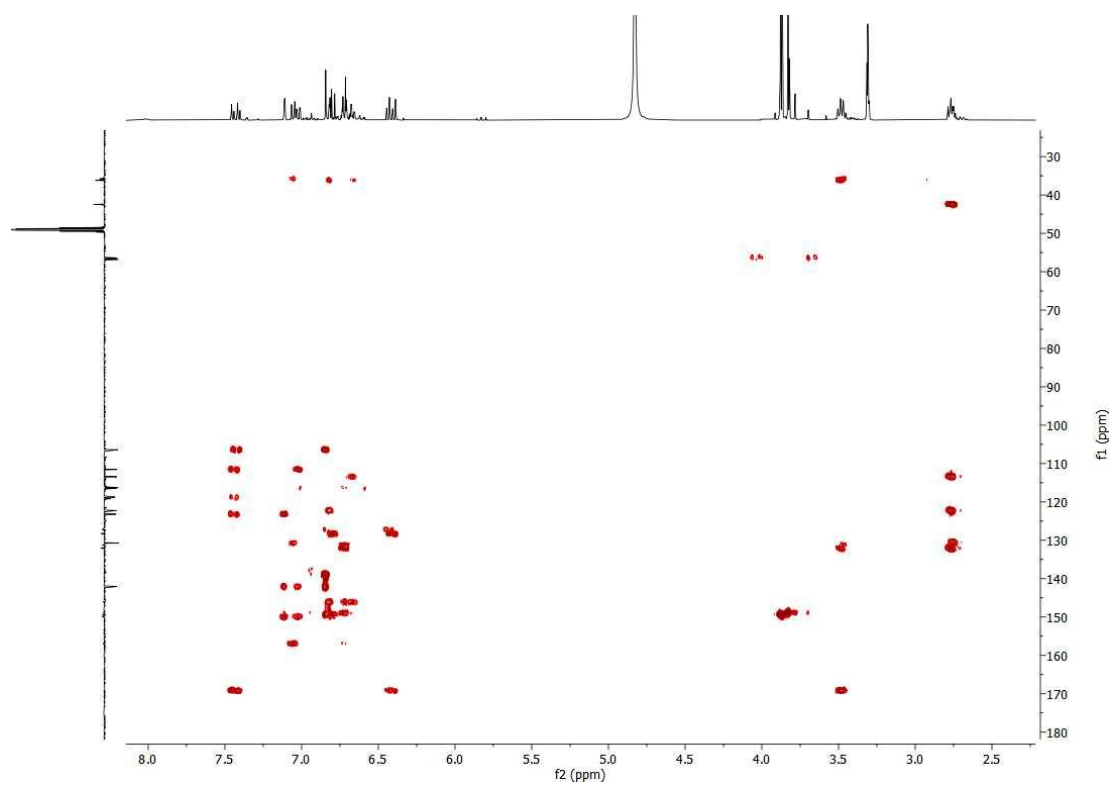

**Figure S84.** HMBC spectrum of compound **11**, **12** (400/100 MHz, MeOD).

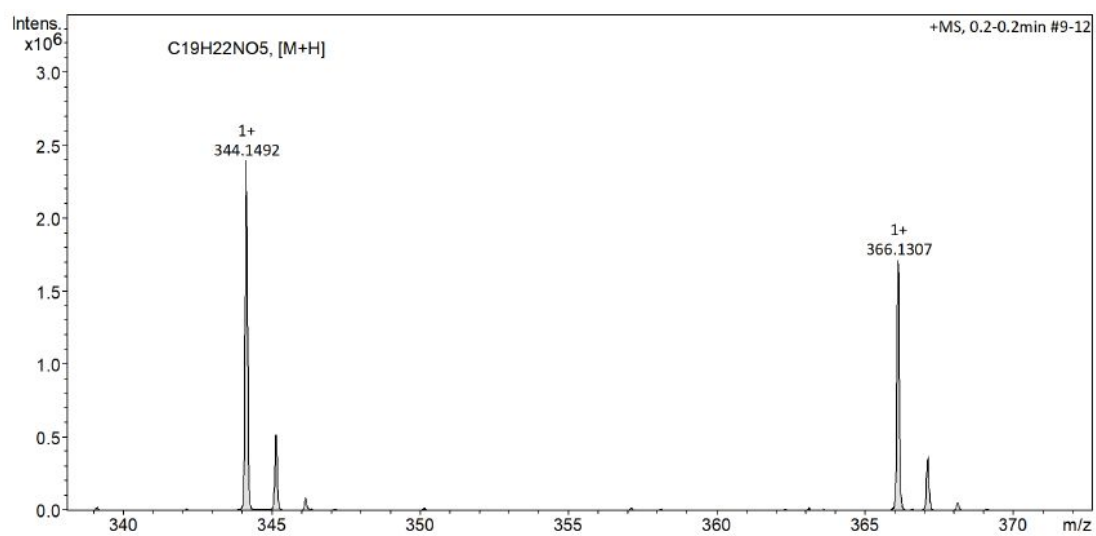

**Figure S85.** HRESIMS spectrum of compounds **11**, **12** ( $[M + H]^+$ , positive mode).

## 12 Spectroscopic data for compounds 13,14

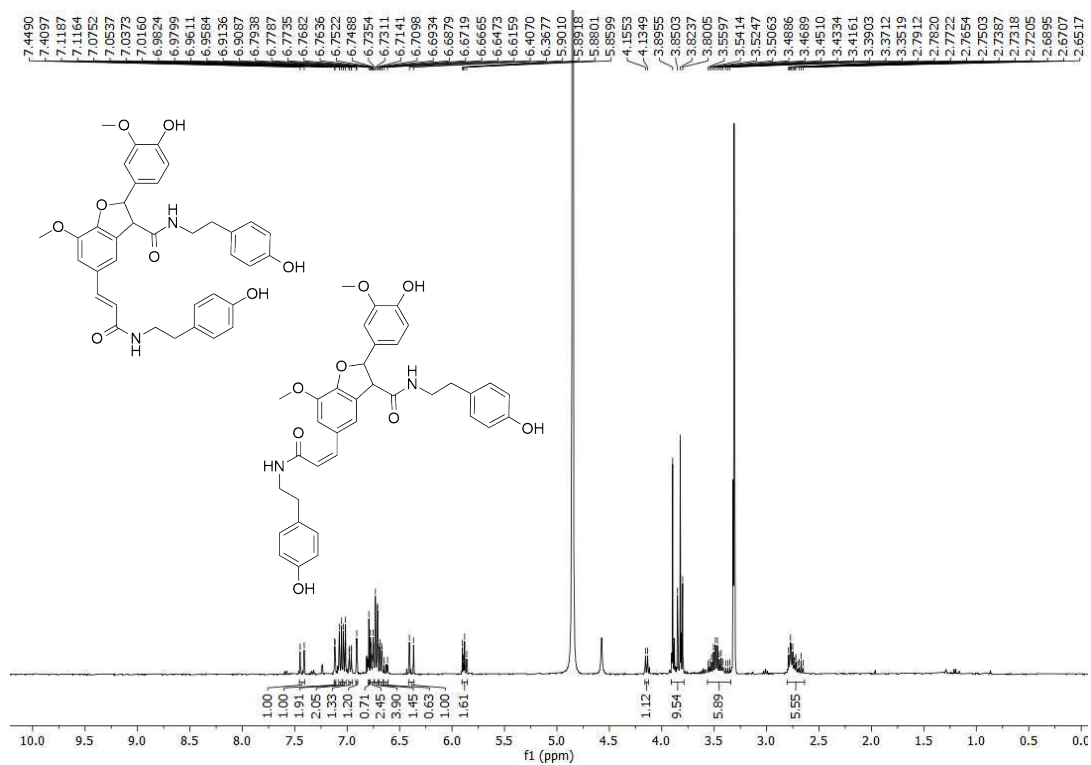

Figure S86.  $^1\text{H}$  NMR spectrum of compounds **13**, **14** (400 MHz, MeOD).

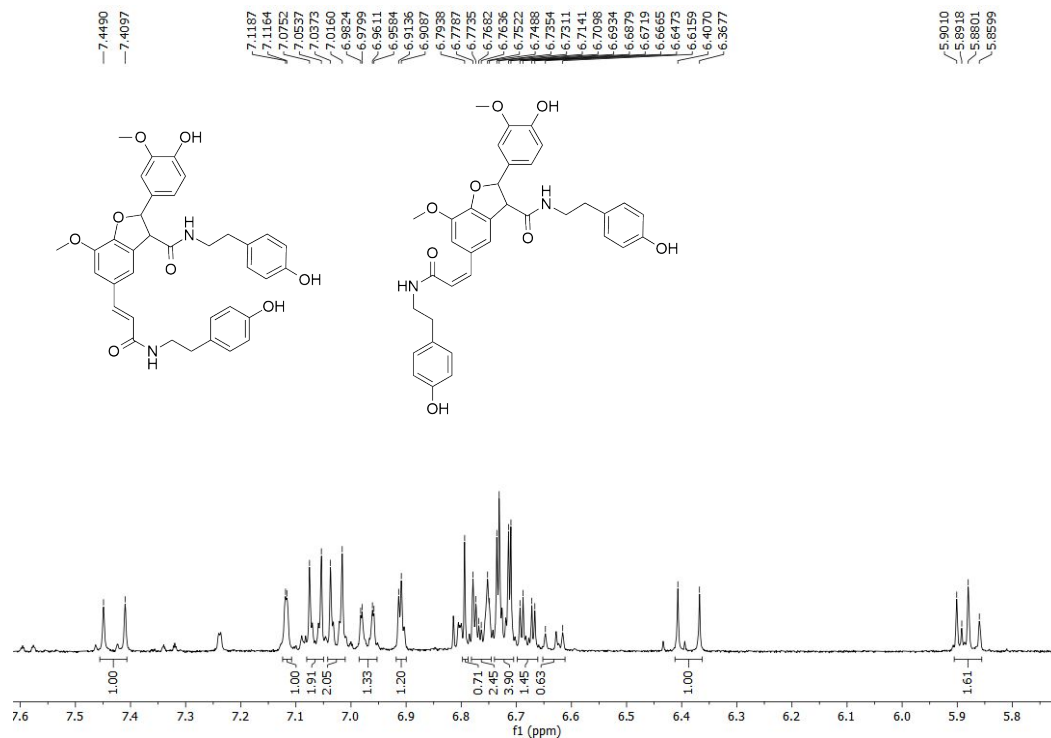

Figure S87. Amplification of the  $^1\text{H}$  NMR spectrum of compounds **13**, **14** (400 MHz, MeOD).

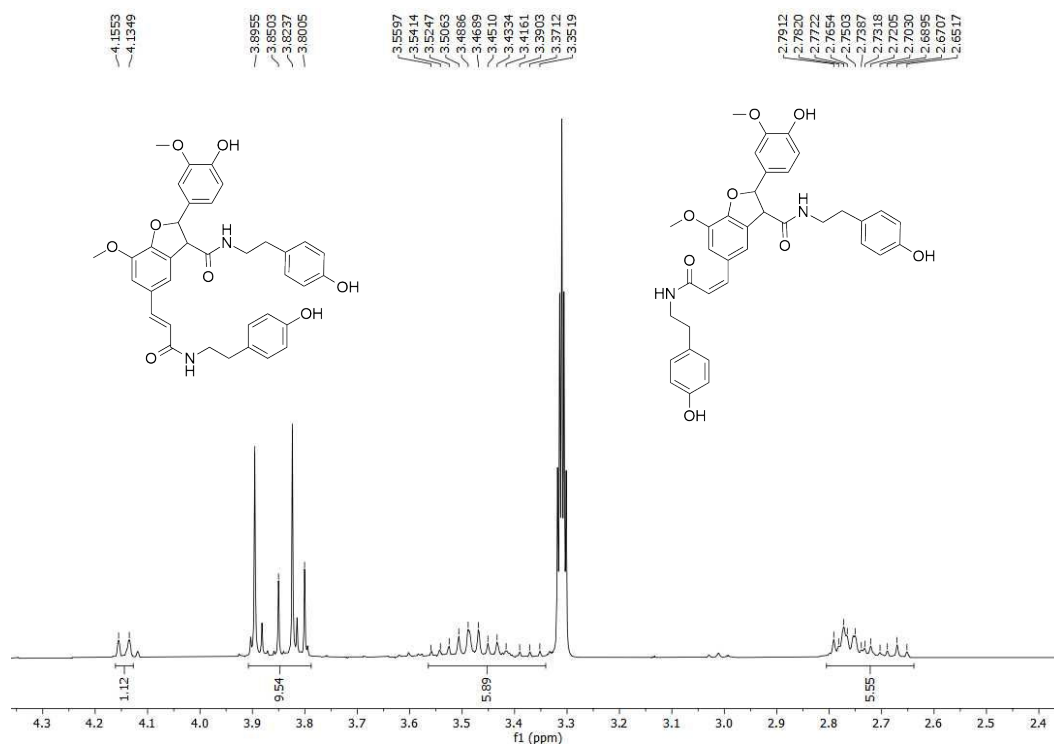

**Figure S88.** Amplification of the  $^1\text{H}$  NMR spectrum of compounds **13**, **14** (400 MHz, MeOD).

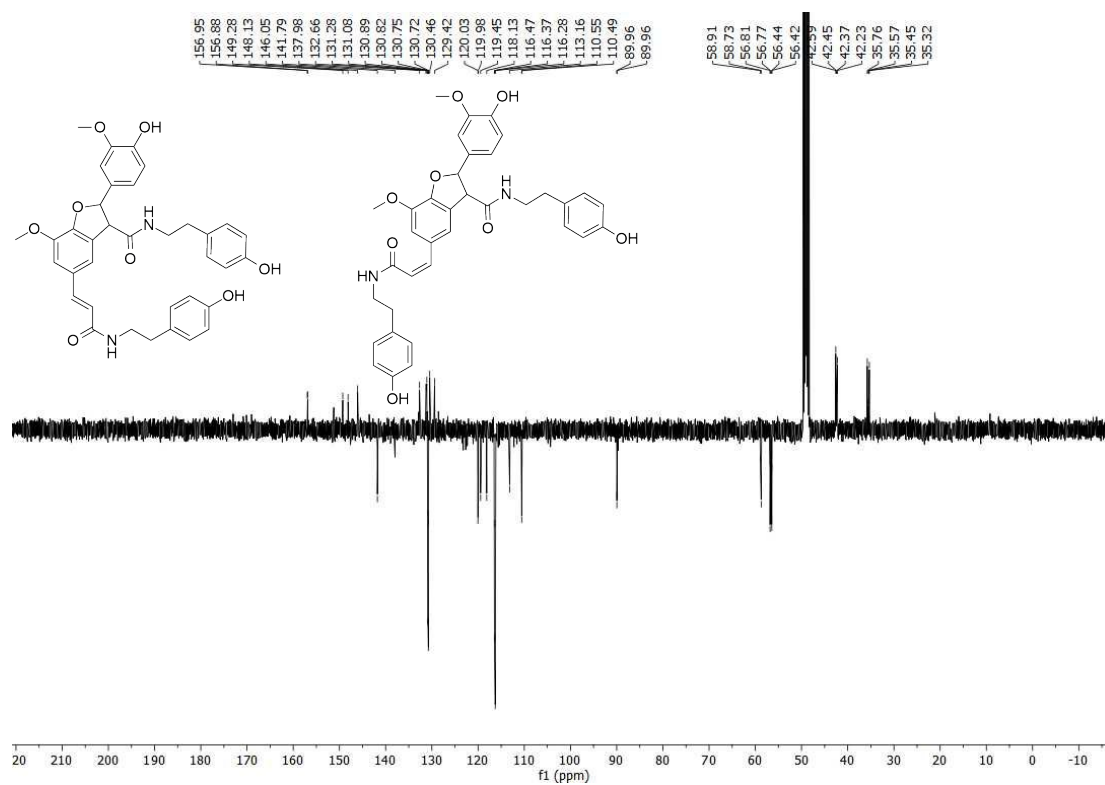

**Figure S89.**  $^{13}\text{C}$ -APT NMR spectrum of compounds **13**, **14** (100 MHz, MeOD).

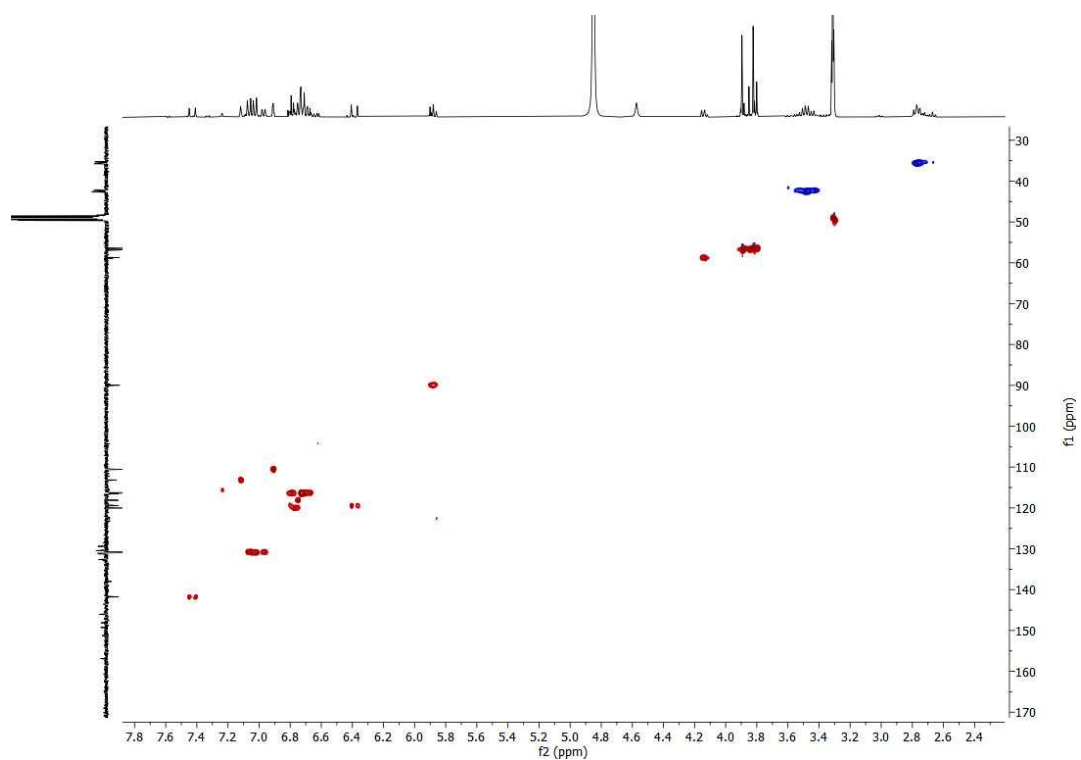

**Figure S90.** HSQC spectrum of compounds **13**, **14** (400/100 MHz, MeOD).

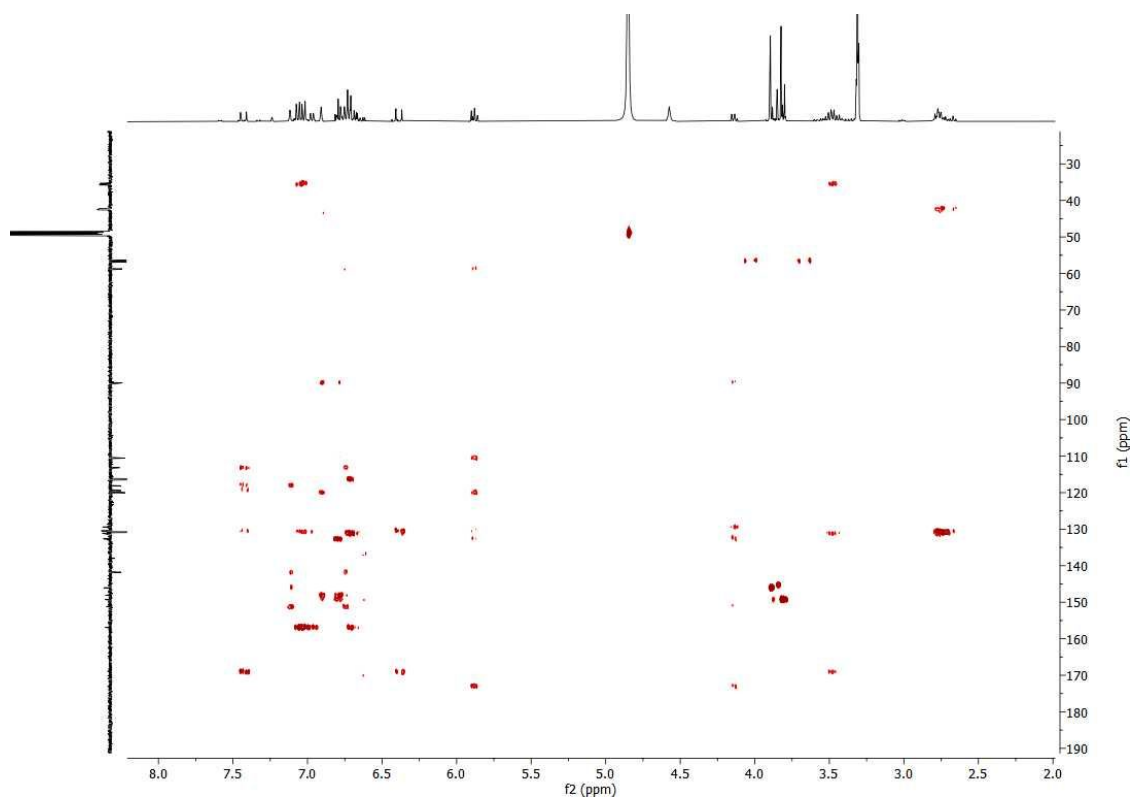

**Figure S91.** HMBC spectrum of compounds **13**, **14** (400/100 MHz, MeOD).



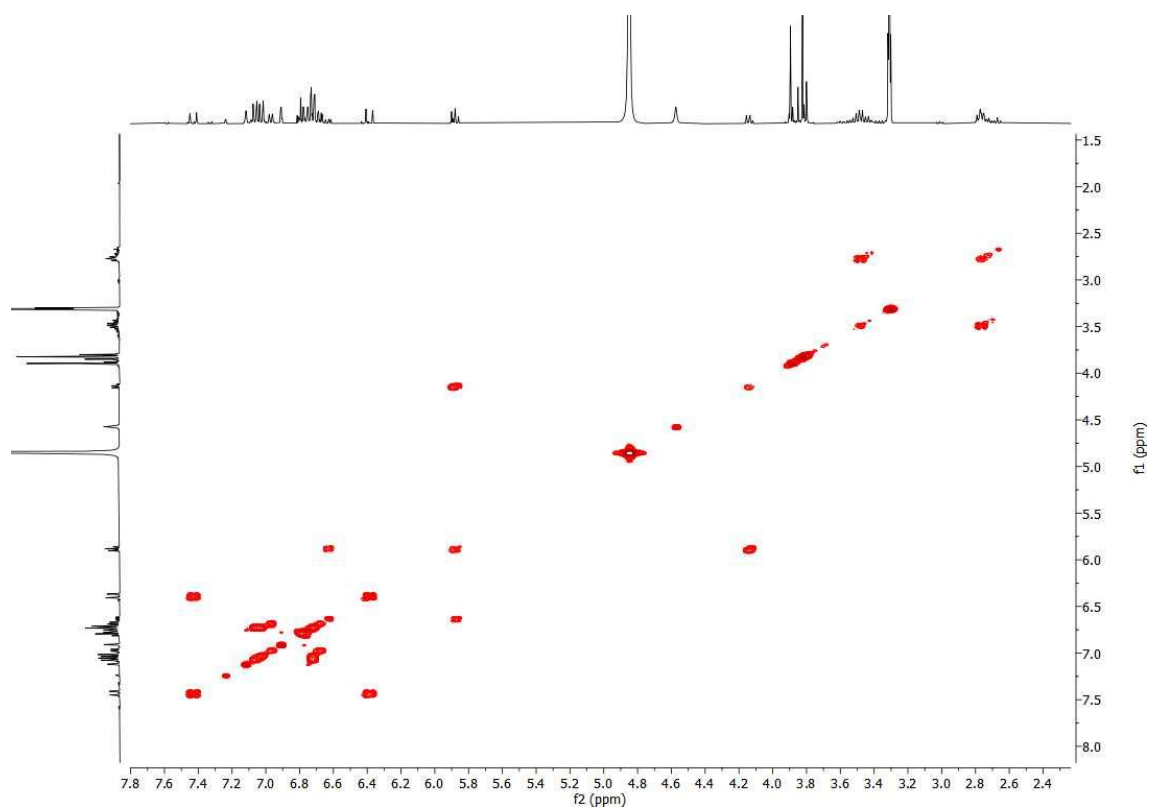

**Figure S92.** COSY spectrum of compounds **13**, **14** (400 MHz, MeOD).

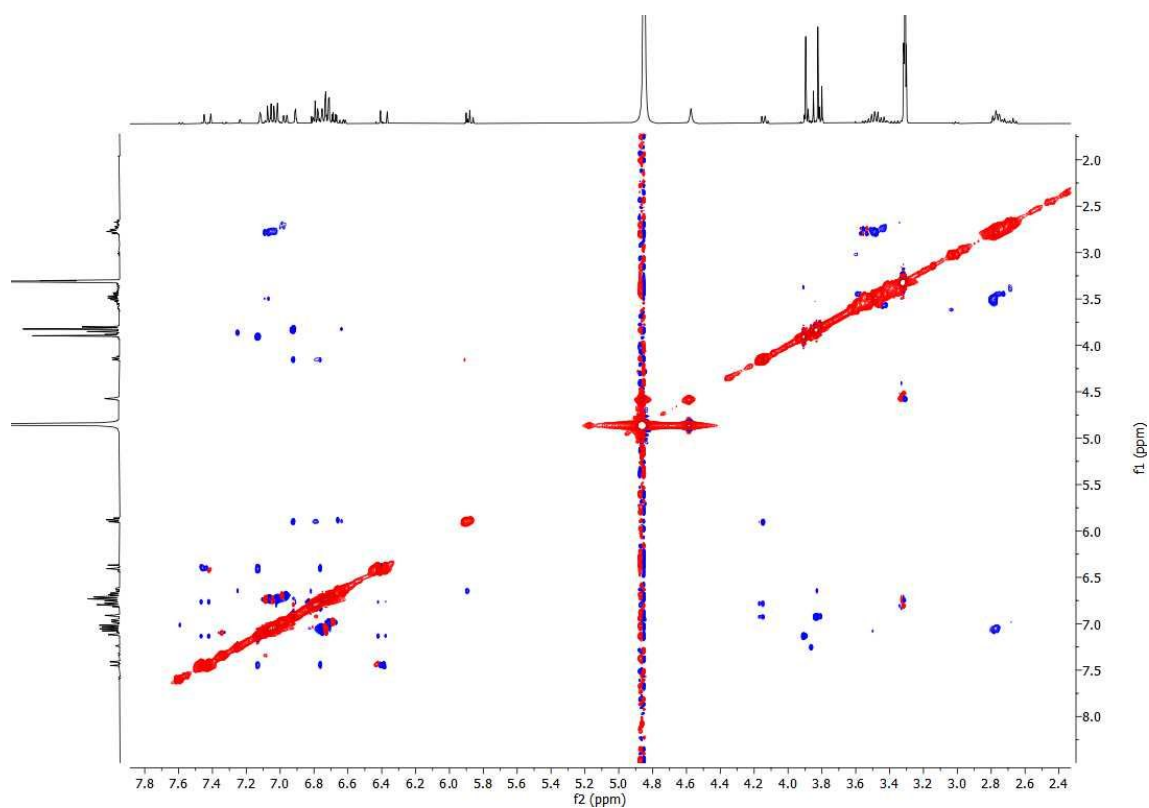

**Figure S93.** COSY spectrum of compounds **13**, **14** (400 MHz, MeOD).

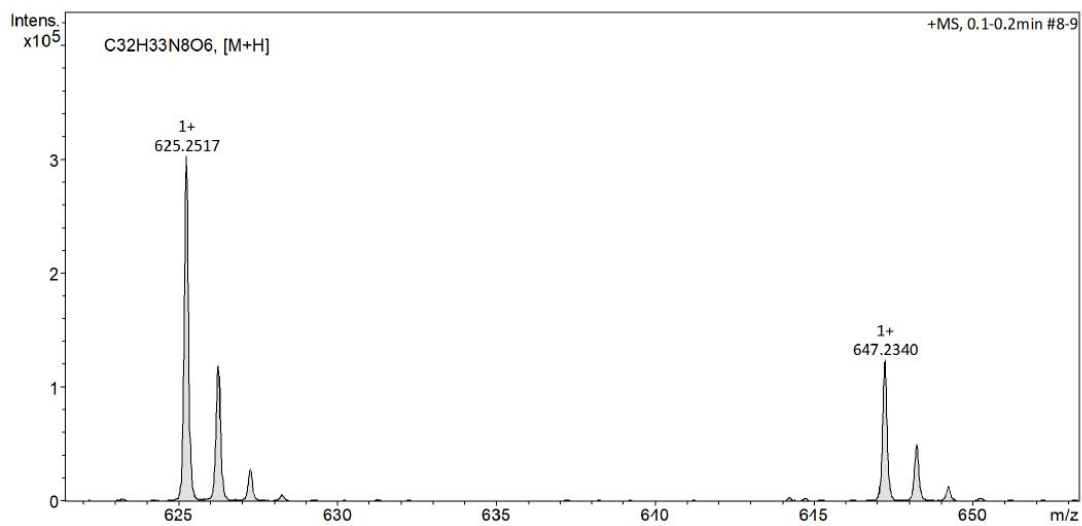

**Figure S94.** HRESIMS spectrum of compounds **13**, **14** ( $[M + H]^+$ , positive mode).

13 Spectroscopic data for compound 15

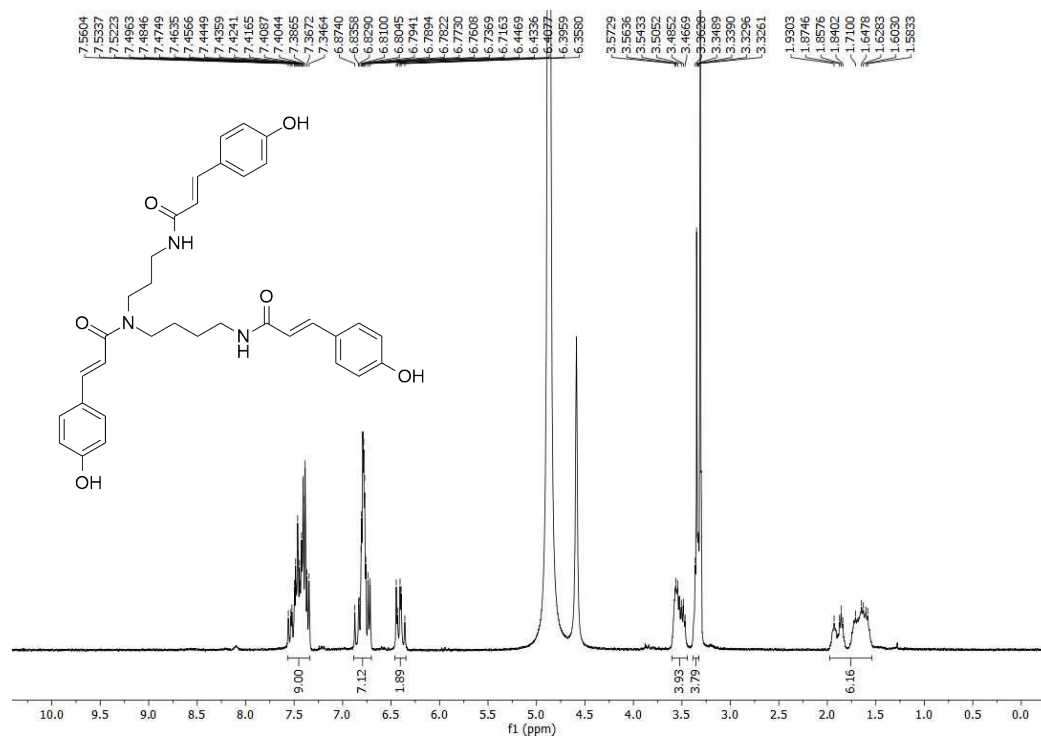

Figure S95. Amplification of the <sup>1</sup>H NMR spectrum of compound 15 (400 MHz, MeOD).

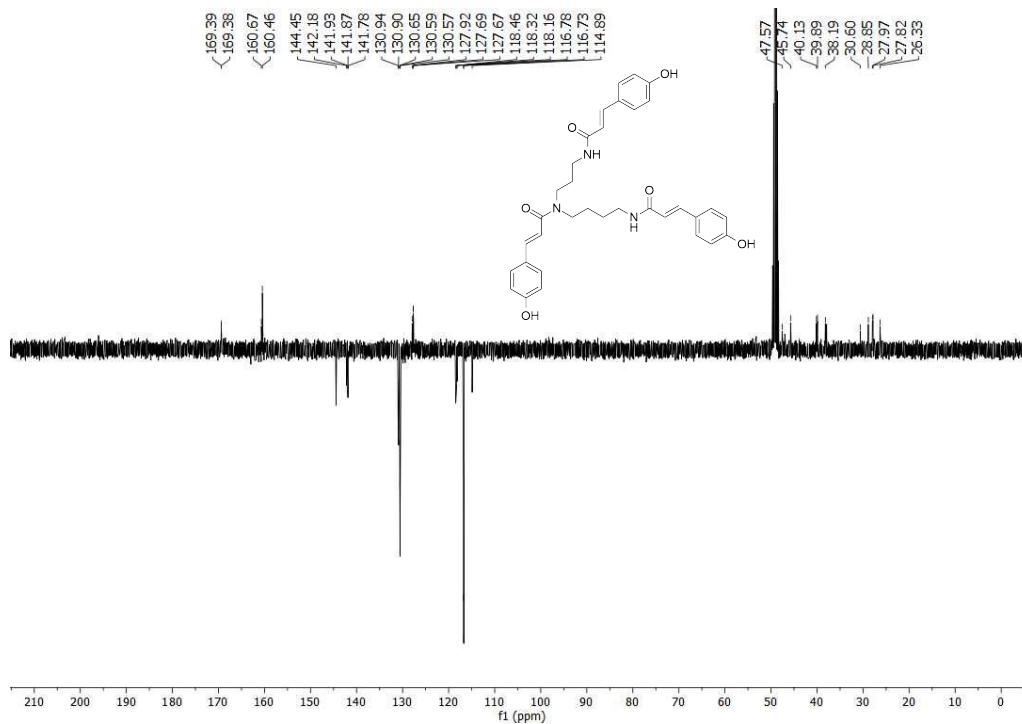

Figure S96. <sup>13</sup>C-APT NMR spectrum of compound 15 (100 MHz, MeOD).

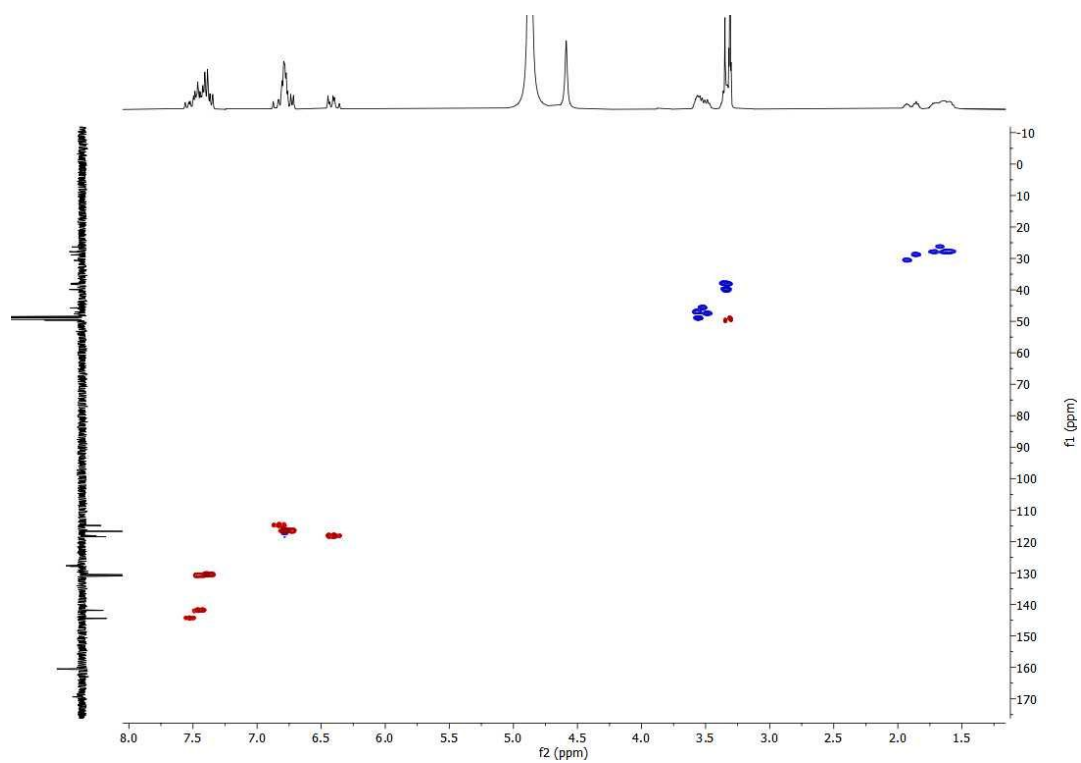

Figure S97. HSQC spectrum of compound **15** (400/100 MHz, MeOD).

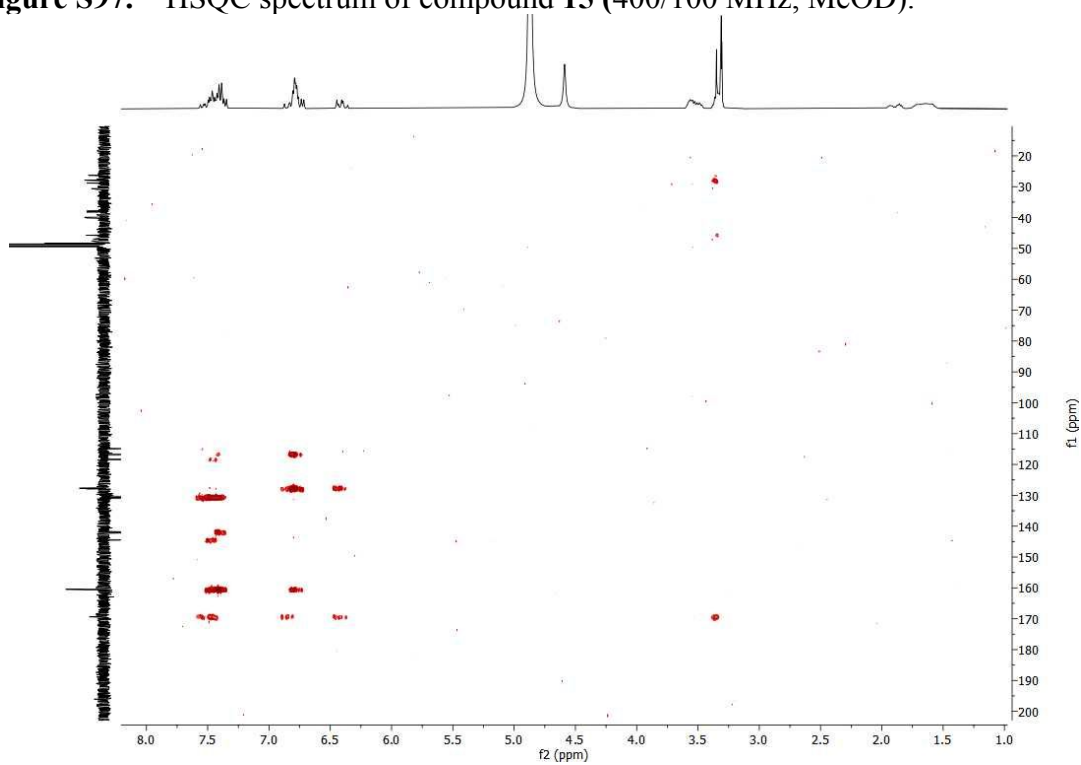

Figure S98. HMBC spectrum of compound **15** (400/100 MHz, MeOD).

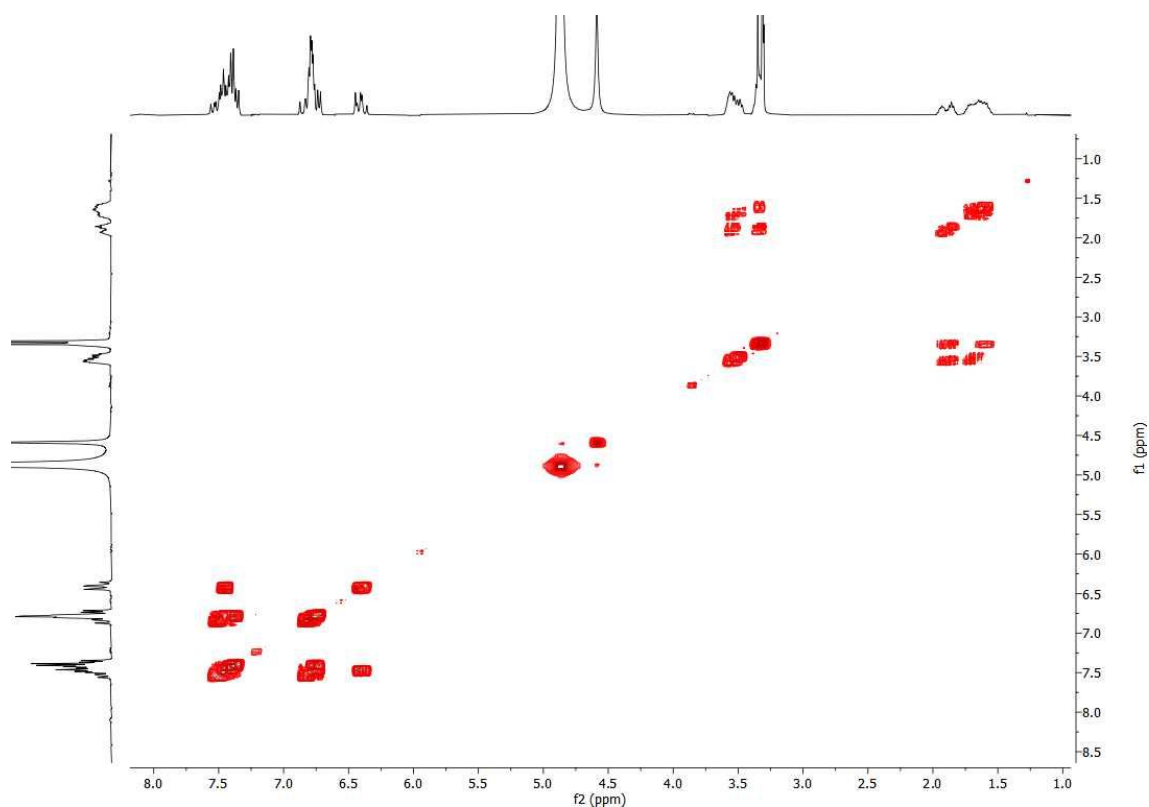

**Figure S99.** COSY spectrum of compound **15** (400 MHz, MeOD).

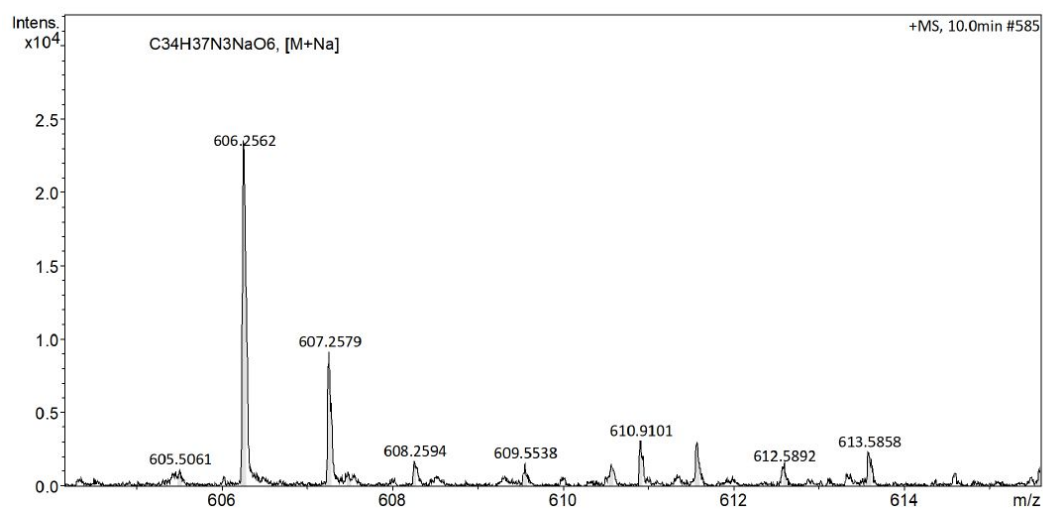

**Figure S100.** HRESIMS spectrum of compound **15** ( $[M + Na]^+$ , positive mode).

## 14 Quantum mechanical calculations for compound 1.

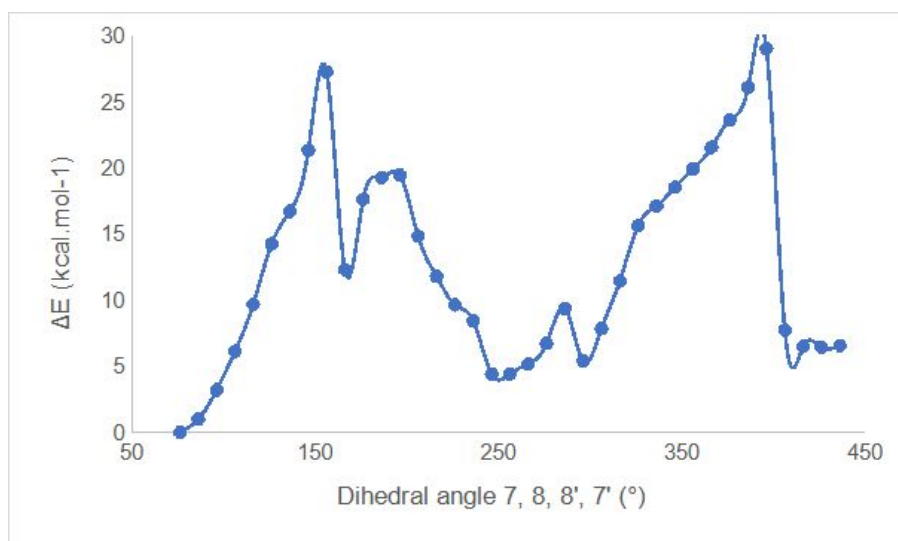

**Figure S101.** Calculated energy levels (in kcal.mol<sup>-1</sup>) for the conformers of compound **1** as a function of rotation around the C7-C8-C8'-C7' dihedral angle.

## 15 NMR calculation data for compound 1.

**Table S1.** DP4+ probabilities obtained by correlating the calculated  $^{13}\text{C}$  and  $^1\text{H}$  NMR chemical shifts of the 4 possible diastereoisomers of (aS)-compound **1** with the experimental NMR data of the isolated natural product.

|                           | <i>7''R*,7'''R*,8aS</i> | <i>7''S*,7'''S*,8aS</i> | <i>7''R*,7'''S*,8aS</i> | <i>7''S*,7'''R*,8aS</i> |
|---------------------------|-------------------------|-------------------------|-------------------------|-------------------------|
| <b>DP4+ Probabilities</b> | 0.00%                   | 100.00%                 | 0.00%                   | 0.00%                   |

**Table S2.** Calculated [GIAO-mPW1PW91/6-31G(d)-PCM//B3LYP/6-31G(d)]  $^1\text{H}$  NMR chemical shifts (in ppm), obtained for 4 diastereoisomers of compound **1**, and experimental data of the isolated natural product.

| Nuclei                       | $\delta_{\text{calc}}$<br>[ <i>7''R*,7'''R*,8aS</i> ] | $\delta_{\text{calc}}$<br>[ <i>7''S*,7'''S*,8aS</i> ] | $\delta_{\text{calc}}$<br>[ <i>7''R*,7'''S*,8aS</i> ] | $\delta_{\text{calc}}$<br>[ <i>7''S*,7'''R*,8aS</i> ] | $\delta_{\text{exp}}$ |
|------------------------------|-------------------------------------------------------|-------------------------------------------------------|-------------------------------------------------------|-------------------------------------------------------|-----------------------|
| <b>2</b>                     | 8.45                                                  | 6.13                                                  | 6.70                                                  | 6.65                                                  | 6.87                  |
| <b>6</b>                     | 7.62                                                  | 6.99                                                  | 6.37                                                  | 6.66                                                  | 6.87                  |
| <b>7</b>                     | 8.06                                                  | 6.53                                                  | 7.71                                                  | 6.44                                                  | 7.82                  |
| <b>2'</b>                    | 7.57                                                  | 6.30                                                  | 6.50                                                  | 6.87                                                  | 6.87                  |
| <b>6'</b>                    | 7.41                                                  | 6.65                                                  | 7.17                                                  | 8.06                                                  | 6.87                  |
| <b>7'</b>                    | 7.85                                                  | 7.54                                                  | 6.81                                                  | 7.26                                                  | 7.86                  |
| <b>2''</b>                   | 8.23                                                  | 7.84                                                  | 7.21                                                  | 7.52                                                  | 6.94                  |
| <b>3''</b>                   | 7.83                                                  | 7.29                                                  | 6.80                                                  | 6.73                                                  | 6.63                  |
| <b>5''</b>                   | 7.39                                                  | 6.59                                                  | 6.30                                                  | 6.93                                                  | 6.63                  |
| <b>6''</b>                   | 8.31                                                  | 7.58                                                  | 7.44                                                  | 7.49                                                  | 6.94                  |
| <b>7''</b>                   | 6.03                                                  | 4.98                                                  | 5.08                                                  | 5.29                                                  | 4.54                  |
| <b>8a''</b>                  | 4.35                                                  | 4.05                                                  | 2.98                                                  | 3.95                                                  | 3.40                  |
| <b>8b''</b>                  | 5.58                                                  | 3.35                                                  | 4.42                                                  | 2.68                                                  | 3.40                  |
| <b>2'''</b>                  | 8.50                                                  | 7.22                                                  | 7.36                                                  | 7.59                                                  | 7.03                  |
| <b>3'''</b>                  | 7.86                                                  | 6.95                                                  | 6.88                                                  | 6.82                                                  | 6.69                  |
| <b>5'''</b>                  | 7.67                                                  | 6.67                                                  | 6.75                                                  | 6.81                                                  | 6.69                  |
| <b>6'''</b>                  | 8.49                                                  | 7.29                                                  | 7.85                                                  | 7.24                                                  | 7.03                  |
| <b>7'''</b>                  | 6.13                                                  | 4.85                                                  | 5.08                                                  | 4.87                                                  | 4.38                  |
| <b>8a'''</b>                 | 3.76                                                  | 4.00                                                  | 4.00                                                  | 2.93                                                  | 3.37                  |
| <b>8b'''</b>                 | 4.91                                                  | 3.02                                                  | 2.70                                                  | 4.36                                                  | 3.37                  |
| <b>3',5'-OCH<sub>3</sub></b> | 4.92                                                  | 3.84                                                  | 3.99                                                  | 3.94                                                  | 3.75                  |
| <b>3-OCH<sub>3</sub></b>     | 4.87                                                  | 3.78                                                  | 3.86                                                  | 4.03                                                  | 3.75                  |
| <b>5-OCH<sub>3</sub></b>     | 4.86                                                  | 3.94                                                  | 3.79                                                  | 3.65                                                  | 3.75                  |

**Table S3.** Calculated [GIAO-mPW1PW91/6-31G(d)-PCM//B3LYP/6-31G(d)] <sup>13</sup>C NMR chemical shifts (in ppm), obtained for 4 diastereoisomers of compound **1**, and experimental data of the isolated natural product.

| Nuclei      | $\delta_{\text{calc}}$<br>[7''R*,7'''R*,<br>8aS] | $\delta_{\text{calc}}$<br>[7''S*,7'''S*,<br>8aS] | $\delta_{\text{calc}}$<br>[7''R*,7'''S*,<br>8aS] | $\delta_{\text{calc}}$<br>[7''S*,7'''R*,<br>8aS] | $\delta_{\text{exp}}$ |
|-------------|--------------------------------------------------|--------------------------------------------------|--------------------------------------------------|--------------------------------------------------|-----------------------|
| <b>1</b>    | 119.5                                            | 115.6                                            | 118.3                                            | 116.3                                            | 126.7                 |
| <b>2</b>    | 104.1                                            | 103.5                                            | 109.6                                            | 114.1                                            | 108.8                 |
| <b>3</b>    | 139.1                                            | 136.1                                            | 134.1                                            | 134.3                                            | 139.0                 |
| <b>4</b>    | 134.3                                            | 128.5                                            | 131.5                                            | 132.5                                            | 149.2                 |
| <b>5</b>    | 137.9                                            | 136.7                                            | 137.9                                            | 137.7                                            | 139.0                 |
| <b>6</b>    | 111.1                                            | 98.7                                             | 101.2                                            | 97.5                                             | 108.8                 |
| <b>7</b>    | 136.6                                            | 130.5                                            | 134.2                                            | 123.1                                            | 142.3                 |
| <b>8</b>    | 125.4                                            | 122.1                                            | 126.0                                            | 125.9                                            | 127.4                 |
| <b>9</b>    | 166.2                                            | 160.9                                            | 163.3                                            | 160.1                                            | 168.2                 |
| <b>1'</b>   | 120.2                                            | 117.3                                            | 116.3                                            | 116.9                                            | 126.7                 |
| <b>2'</b>   | 104.0                                            | 99.6                                             | 113.7                                            | 107.5                                            | 108.9                 |
| <b>3'</b>   | 138.7                                            | 137.8                                            | 135.7                                            | 136.1                                            | 139.1                 |
| <b>4'</b>   | 132.5                                            | 130.1                                            | 132.9                                            | 131.8                                            | 149.2                 |
| <b>5'</b>   | 138.2                                            | 135.5                                            | 138.1                                            | 137.5                                            | 139.1                 |
| <b>6'</b>   | 107.6                                            | 108.6                                            | 100.5                                            | 100.4                                            | 108.9                 |
| <b>7'</b>   | 131.7                                            | 136.1                                            | 130.8                                            | 135.9                                            | 142.5                 |
| <b>8'</b>   | 130.5                                            | 124.1                                            | 123.1                                            | 123.3                                            | 127.6                 |
| <b>9'</b>   | 164.1                                            | 162.0                                            | 161.6                                            | 161.5                                            | 168.2                 |
| <b>1''</b>  | 125.5                                            | 126.6                                            | 124.9                                            | 123.0                                            | 134.2                 |
| <b>2''</b>  | 121.7                                            | 120.9                                            | 119.2                                            | 118.4                                            | 128.4                 |
| <b>3''</b>  | 109.5                                            | 107.6                                            | 105.5                                            | 105.5                                            | 116.0                 |
| <b>4''</b>  | 146.8                                            | 144.2                                            | 144.7                                            | 144.9                                            | 158.0                 |
| <b>5''</b>  | 108.9                                            | 104.7                                            | 104.9                                            | 105.9                                            | 116.0                 |
| <b>6''</b>  | 121.9                                            | 122.5                                            | 120.2                                            | 118.7                                            | 128.4                 |
| <b>7''</b>  | 75.9                                             | 70.4                                             | 71.7                                             | 68.8                                             | 73.0                  |
| <b>8''</b>  | 49.2                                             | 43.8                                             | 45.7                                             | 45.1                                             | 48.5                  |
| <b>1'''</b> | 128.0                                            | 125.1                                            | 124.7                                            | 121.8                                            | 134.3                 |
| <b>2'''</b> | 121.5                                            | 118.3                                            | 119.0                                            | 117.7                                            | 128.3                 |
| <b>3'''</b> | 108.6                                            | 106.5                                            | 105.8                                            | 107.6                                            | 116.1                 |
| <b>4'''</b> | 146.5                                            | 145.1                                            | 145.0                                            | 145.5                                            | 158.0                 |
| <b>5'''</b> | 108.9                                            | 105.7                                            | 105.6                                            | 108.0                                            | 116.1                 |
| <b>6'''</b> | 121.7                                            | 119.3                                            | 118.8                                            | 118.7                                            | 128.3                 |
| <b>7'''</b> | 72.1                                             | 70.0                                             | 67.6                                             | 67.1                                             | 73.5                  |
| <b>8'''</b> | 51.3                                             | 47.0                                             | 43.6                                             | 44.7                                             | 48.5                  |



|                              |      |      |      |      |      |
|------------------------------|------|------|------|------|------|
| <b>3',5'-OCH<sub>3</sub></b> | 56.0 | 50.4 | 52.8 | 52.0 | 56.7 |
| <b>3-OCH<sub>3</sub></b>     | 56.3 | 49.7 | 53.9 | 53.6 | 56.7 |
| <b>5-OCH<sub>3</sub></b>     | 57.3 | 51.7 | 50.4 | 50.5 | 56.7 |

---

## 16 NMR calculation data for compound 2.

**Table S4.** DP4+ probabilities obtained by correlating the calculated  $^{13}\text{C}$  and  $^1\text{H}$  NMR chemical shifts of the 4 possible diastereoisomers of compound **2** with the experimental NMR data of the isolated natural product.

|                           | $7S^*,7'S^*,7''S^*,7'''R^*,8S^*,8'S^*$ | $7S^*,7'S^*,7''R^*,7'''S^*,8S^*,8'S^*$ | $7S^*,7'S^*,7''R^*,7'''R^*,8S^*,8'S^*$ | $7S^*,7'S^*,7''S^*,7'''S^*,8S^*,8'S^*$ |
|---------------------------|----------------------------------------|----------------------------------------|----------------------------------------|----------------------------------------|
| <b>DP4+ Probabilities</b> | 0.00%                                  | 0.00%                                  | 100.00%                                | 0.00%                                  |

**Table S5.** Calculated [GIAO-mPW1PW91/6-31G(d)-PCM//B3LYP/6-31G(d)]  $^1\text{H}$  NMR chemical shifts (in ppm), obtained for 4 diastereoisomers of compound **2**, and experimental data of the isolated natural product.

| Nuclei                       | $\delta_{\text{calc}}$                   | $\delta_{\text{calc}}$                   | $\delta_{\text{calc}}$                   | $\delta_{\text{calc}}$                   | $\delta_{\text{exp}}$ |
|------------------------------|------------------------------------------|------------------------------------------|------------------------------------------|------------------------------------------|-----------------------|
|                              | $[7S^*,7'S^*,7''S^*,7'''R^*,8S^*,8'S^*]$ | $[7S^*,7'S^*,7''R^*,7'''S^*,8S^*,8'S^*]$ | $[7S^*,7'S^*,7''R^*,7'''R^*,8S^*,8'S^*]$ | $[7S^*,7'S^*,7''S^*,7'''S^*,8S^*,8'S^*]$ |                       |
| <b>2</b>                     | 6.00                                     | 5.88                                     | 6.39                                     | 6.71                                     | 6.73                  |
| <b>6</b>                     | 6.98                                     | 7.00                                     | 7.08                                     | 6.96                                     | 6.73                  |
| <b>7</b>                     | 5.46                                     | 5.52                                     | 5.20                                     | 6.18                                     | 5.27                  |
| <b>8</b>                     | 1.62                                     | 1.20                                     | 2.81                                     | 3.16                                     | 3.38                  |
| <b>2'</b>                    | 5.89                                     | 6.98                                     | 6.97                                     | 7.18                                     | 6.73                  |
| <b>6'</b>                    | 6.98                                     | 6.00                                     | 6.84                                     | 6.82                                     | 6.73                  |
| <b>7'</b>                    | 5.53                                     | 5.46                                     | 6.13                                     | 4.78                                     | 5.29                  |
| <b>8'</b>                    | 1.17                                     | 1.63                                     | 3.55                                     | 2.23                                     | 3.38                  |
| <b>2''</b>                   | 7.18                                     | 7.99                                     | 7.25                                     | 7.46                                     | 6.96                  |
| <b>3''</b>                   | 6.18                                     | 7.04                                     | 7.02                                     | 6.96                                     | 6.66                  |
| <b>5''</b>                   | 7.07                                     | 6.28                                     | 6.89                                     | 7.41                                     | 6.66                  |
| <b>6''</b>                   | 7.52                                     | 7.20                                     | 7.79                                     | 7.91                                     | 6.96                  |
| <b>7''</b>                   | 5.00                                     | 5.18                                     | 4.22                                     | 5.33                                     | 4.49                  |
| <b>8a''</b>                  | 3.67                                     | 3.06                                     | 2.69                                     | 3.70                                     | 3.45                  |
| <b>8b''</b>                  | 3.46                                     | 4.47                                     | 3.70                                     | 4.13                                     | 3.22                  |
| <b>2'''</b>                  | 7.26                                     | 7.19                                     | 7.75                                     | 7.65                                     | 6.96                  |
| <b>3'''</b>                  | 6.35                                     | 6.24                                     | 7.00                                     | 7.11                                     | 6.66                  |
| <b>5'''</b>                  | 6.97                                     | 7.08                                     | 6.79                                     | 7.16                                     | 6.66                  |
| <b>6'''</b>                  | 7.92                                     | 7.54                                     | 7.71                                     | 7.85                                     | 6.96                  |
| <b>7'''</b>                  | 5.18                                     | 5.00                                     | 4.88                                     | 5.51                                     | 4.49                  |
| <b>8a'''</b>                 | 4.47                                     | 3.67                                     | 4.54                                     | 3.24                                     | 3.45                  |
| <b>8b'''</b>                 | 3.05                                     | 3.46                                     | 3.25                                     | 4.55                                     | 3.22                  |
| <b>3',5'-OCH<sub>3</sub></b> | 4.08                                     | 3.94                                     | 4.04                                     | 4.58                                     | 3.87                  |
| <b>3-OCH<sub>3</sub></b>     | 4.10                                     | 4.10                                     | 4.07                                     | 4.19                                     | 3.87                  |
| <b>5-OCH<sub>3</sub></b>     | 3.94                                     | 3.95                                     | 4.12                                     | 4.46                                     | 3.87                  |

**Table S6.** Calculated [GIAO-mPW1PW91/6-31G(d)-PCM//B3LYP/6-31G(d)] <sup>13</sup>C NMR chemical shifts (in ppm), obtained for 4 diastereoisomers of compound **2**, and experimental data of the isolated natural product.

| Nuclei      | $\delta_{\text{calc}}$                                                                     | $\delta_{\text{calc}}$                                                                     | $\delta_{\text{calc}}$                                                                     | $\delta_{\text{calc}}$                                                                     | $\delta_{\text{exp}}$ |
|-------------|--------------------------------------------------------------------------------------------|--------------------------------------------------------------------------------------------|--------------------------------------------------------------------------------------------|--------------------------------------------------------------------------------------------|-----------------------|
|             | [7 <i>S</i> *,7' <i>S</i> *,7'' <i>S</i> *,<br>7''' <i>R</i> *,8 <i>S</i> *,8' <i>S</i> *] | [7 <i>S</i> *,7' <i>S</i> *,7'' <i>R</i> *,<br>7''' <i>S</i> *,8 <i>S</i> *,8' <i>S</i> *] | [7 <i>S</i> *,7' <i>S</i> *,7'' <i>R</i> *,<br>7''' <i>R</i> *,8 <i>S</i> *,8' <i>S</i> *] | [7 <i>S</i> *,7' <i>S</i> *,7'' <i>S</i> *,<br>7''' <i>S</i> *,8 <i>S</i> *,8' <i>S</i> *] |                       |
| <b>1</b>    | 126.0                                                                                      | 125.3                                                                                      | 123.1                                                                                      | 128.7                                                                                      | 132.3                 |
| <b>2</b>    | 104.8                                                                                      | 105.4                                                                                      | 107.0                                                                                      | 97.8                                                                                       | 104.8                 |
| <b>3</b>    | 134.8                                                                                      | 134.1                                                                                      | 135.6                                                                                      | 138.6                                                                                      | 149.4                 |
| <b>4</b>    | 129.4                                                                                      | 130.0                                                                                      | 130.9                                                                                      | 130.2                                                                                      | 136.6                 |
| <b>5</b>    | 137.6                                                                                      | 137.4                                                                                      | 138.6                                                                                      | 135.1                                                                                      | 149.4                 |
| <b>6</b>    | 96.3                                                                                       | 97.9                                                                                       | 95.8                                                                                       | 103.5                                                                                      | 104.8                 |
| <b>7</b>    | 75.9                                                                                       | 76.0                                                                                       | 79.3                                                                                       | 76.7                                                                                       | 86.3                  |
| <b>8</b>    | 56.4                                                                                       | 55.7                                                                                       | 57.5                                                                                       | 54.6                                                                                       | 60.3                  |
| <b>9</b>    | 163.5                                                                                      | 159.7                                                                                      | 163.1                                                                                      | 163.9                                                                                      | 172.5                 |
| <b>1'</b>   | 125.4                                                                                      | 126.0                                                                                      | 124.7                                                                                      | 122.7                                                                                      | 132.3                 |
| <b>2'</b>   | 104.5                                                                                      | 96.3                                                                                       | 95.6                                                                                       | 108.4                                                                                      | 104.8                 |
| <b>3'</b>   | 134.3                                                                                      | 137.6                                                                                      | 138.1                                                                                      | 136.6                                                                                      | 149.4                 |
| <b>4'</b>   | 129.6                                                                                      | 129.4                                                                                      | 130.2                                                                                      | 132.3                                                                                      | 136.6                 |
| <b>5'</b>   | 137.4                                                                                      | 134.8                                                                                      | 136.3                                                                                      | 138.4                                                                                      | 149.4                 |
| <b>6'</b>   | 97.5                                                                                       | 104.8                                                                                      | 105.1                                                                                      | 101.5                                                                                      | 104.8                 |
| <b>7'</b>   | 76.0                                                                                       | 75.9                                                                                       | 77.9                                                                                       | 80.2                                                                                       | 86.3                  |
| <b>8'</b>   | 55.9                                                                                       | 56.4                                                                                       | 53.5                                                                                       | 56.3                                                                                       | 60.3                  |
| <b>9'</b>   | 159.7                                                                                      | 163.5                                                                                      | 158.6                                                                                      | 162.5                                                                                      | 172.5                 |
| <b>1''</b>  | 124.2                                                                                      | 120.4                                                                                      | 123.8                                                                                      | 125.2                                                                                      | 134.2                 |
| <b>2''</b>  | 118.9                                                                                      | 119.1                                                                                      | 119.6                                                                                      | 119.3                                                                                      | 128.5                 |
| <b>3''</b>  | 107.1                                                                                      | 107.6                                                                                      | 106.5                                                                                      | 107.8                                                                                      | 116.1                 |
| <b>4''</b>  | 145.8                                                                                      | 146.1                                                                                      | 145.4                                                                                      | 145.8                                                                                      | 158.0                 |
| <b>5''</b>  | 107.0                                                                                      | 107.4                                                                                      | 106.0                                                                                      | 107.3                                                                                      | 116.1                 |
| <b>6''</b>  | 118.7                                                                                      | 119.3                                                                                      | 119.5                                                                                      | 119.5                                                                                      | 128.5                 |
| <b>7''</b>  | 67.2                                                                                       | 69.0                                                                                       | 71.7                                                                                       | 69.7                                                                                       | 73.1                  |
| <b>8''</b>  | 46.1                                                                                       | 40.5                                                                                       | 47.5                                                                                       | 48.1                                                                                       | 48.1                  |
| <b>1'''</b> | 120.4                                                                                      | 124.1                                                                                      | 124.7                                                                                      | 121.1                                                                                      | 134.2                 |
| <b>2'''</b> | 119.3                                                                                      | 118.9                                                                                      | 121.0                                                                                      | 119.6                                                                                      | 128.5                 |
| <b>3'''</b> | 107.4                                                                                      | 107.3                                                                                      | 106.7                                                                                      | 107.5                                                                                      | 116.1                 |
| <b>4'''</b> | 146.1                                                                                      | 145.9                                                                                      | 145.2                                                                                      | 146.6                                                                                      | 158.0                 |
| <b>5'''</b> | 107.6                                                                                      | 107.0                                                                                      | 106.2                                                                                      | 108.5                                                                                      | 116.1                 |
| <b>6'''</b> | 119.1                                                                                      | 118.8                                                                                      | 120.6                                                                                      | 120.7                                                                                      | 128.5                 |
| <b>7'''</b> | 69.0                                                                                       | 67.2                                                                                       | 68.1                                                                                       | 69.6                                                                                       | 73.1                  |
| <b>8'''</b> | 40.4                                                                                       | 46.1                                                                                       | 39.8                                                                                       | 44.7                                                                                       | 48.1                  |

|                              |      |      |      |      |      |
|------------------------------|------|------|------|------|------|
| <b>3',5'-OCH<sub>3</sub></b> | 52.3 | 52.3 | 52.1 | 54.1 | 56.8 |
| <b>3-OCH<sub>3</sub></b>     | 54.2 | 54.2 | 53.4 | 52.1 | 56.8 |
| <b>5-OCH<sub>3</sub></b>     | 50.4 | 50.6 | 51.1 | 55.6 | 56.8 |

---

## 17 NMR calculation data for compound 3.

**Table S7.** DP4+ probabilities obtained by correlating the calculated  $^{13}\text{C}$  and  $^1\text{H}$  NMR chemical shifts of both stereoisomers of compound **3** with the experimental NMR data of the isolated natural product.

|                           | <i>7S,7'S,7'''S,8S,8'S</i> | <i>7R,7'R,7'''S,8R,8'R</i> |
|---------------------------|----------------------------|----------------------------|
| <b>DP4+ Probabilities</b> | 100.00%                    | 0.00%                      |

**Table S8.** Calculated [GIAO-mPW1PW91/6-31G(d)-PCM//B3LYP/6-31G(d)]  $^1\text{H}$  NMR chemical shifts (in ppm), obtained for both diastereoisomers of compound **3**, and experimental data of the isolated natural product.

| Nuclei            | $\delta_{\text{calc}}$         |                                | $\delta_{\text{exp}}$ |
|-------------------|--------------------------------|--------------------------------|-----------------------|
|                   | [ <i>7S,7'S,7'''S,8S,8'S</i> ] | [ <i>7R,7'R,7'''S,8R,8'R</i> ] |                       |
| <b>2</b>          | 6.49                           | 6.25                           | 6.71                  |
| <b>6</b>          | 7.13                           | 6.89                           | 6.71                  |
| <b>7</b>          | 5.55                           | 5.34                           | 5.26                  |
| <b>8</b>          | 2.22                           | 0.87                           | 3.35                  |
| <b>2'</b>         | 6.26                           | 6.61                           | 6.73                  |
| <b>6'</b>         | 7.09                           | 6.58                           | 6.73                  |
| <b>7'</b>         | 5.45                           | 5.63                           | 5.28                  |
| <b>8'</b>         | 1.76                           | 1.38                           | 3.40                  |
| <b>2''</b>        | 7.38                           | 7.52                           | 6.83                  |
| <b>3''</b>        | 6.53                           | 6.92                           | 6.63                  |
| <b>5''</b>        | 7.02                           | 6.36                           | 6.63                  |
| <b>6''</b>        | 7.24                           | 6.99                           | 6.83                  |
| <b>7a''</b>       | 2.87                           | 2.64                           | 2.59                  |
| <b>7b''</b>       | 2.40                           | 3.02                           | 2.53                  |
| <b>8a''</b>       | 2.80                           | 3.77                           | 3.37                  |
| <b>8b''</b>       | 4.28                           | 3.00                           | 3.18                  |
| <b>2'''</b>       | 7.60                           | 7.12                           | 6.95                  |
| <b>3'''</b>       | 7.22                           | 6.26                           | 6.66                  |
| <b>5'''</b>       | 6.72                           | 6.82                           | 6.66                  |
| <b>6'''</b>       | 7.49                           | 7.81                           | 6.95                  |
| <b>7'''</b>       | 5.15                           | 5.13                           | 4.46                  |
| <b>8a'''</b>      | 3.38                           | 4.38                           | 3.49                  |
| <b>8b'''</b>      | 3.89                           | 3.05                           | 3.18                  |
| <b>3,5-OCH3</b>   | 4.12                           | 4.03                           | 3.88                  |
| <b>3',5'-OCH3</b> | 4.07                           | 4.00                           | 3.86                  |

**Table S9.** Calculated [GIAO-mPW1PW91/6-31G(d)-PCM//B3LYP/6-31G(d)] <sup>13</sup>C NMR chemical shifts (in ppm), obtained for both diastereoisomers of compound **3**, and experimental data of the isolated natural product.

| Nuclei            | $\delta_{\text{calc}}$<br>[7 <i>S</i> ,7' <i>S</i> ,7'' <i>S</i> ,8 <i>S</i> ,8' <i>S</i> ] | $\delta_{\text{calc}}$<br>[7 <i>R</i> ,7' <i>R</i> ,7'' <i>S</i> ,8 <i>R</i> ,8' <i>R</i> ] | $\delta_{\text{exp}}$ |
|-------------------|---------------------------------------------------------------------------------------------|---------------------------------------------------------------------------------------------|-----------------------|
| <b>1</b>          | 123.2                                                                                       | 126.3                                                                                       | 131.0                 |
| <b>2</b>          | 103.7                                                                                       | 98.7                                                                                        | 104.7                 |
| <b>3</b>          | 136.0                                                                                       | 135.7                                                                                       | 149.5                 |
| <b>4</b>          | 129.2                                                                                       | 127.7                                                                                       | 136.7                 |
| <b>5</b>          | 138.2                                                                                       | 136.8                                                                                       | 149.5                 |
| <b>6</b>          | 95.2                                                                                        | 97.9                                                                                        | 104.7                 |
| <b>7</b>          | 78.3                                                                                        | 79.1                                                                                        | 86.4                  |
| <b>8</b>          | 58.4                                                                                        | 58.4                                                                                        | 60.6                  |
| <b>9</b>          | 159.1                                                                                       | 160.1                                                                                       | 172.1                 |
| <b>1'</b>         | 125.6                                                                                       | 126.8                                                                                       | 132.4                 |
| <b>2'</b>         | 105.3                                                                                       | 101.1                                                                                       | 104.9                 |
| <b>3'</b>         | 135.2                                                                                       | 136.0                                                                                       | 149.4                 |
| <b>4'</b>         | 129.8                                                                                       | 129.3                                                                                       | 136.7                 |
| <b>5'</b>         | 137.9                                                                                       | 136.0                                                                                       | 149.4                 |
| <b>6'</b>         | 96.8                                                                                        | 100.6                                                                                       | 104.9                 |
| <b>7'</b>         | 77.6                                                                                        | 78.5                                                                                        | 86.4                  |
| <b>8'</b>         | 56.2                                                                                        | 56.6                                                                                        | 60.3                  |
| <b>9'</b>         | 165.9                                                                                       | 161.1                                                                                       | 172.5                 |
| <b>1''</b>        | 120.3                                                                                       | 121.0                                                                                       | 130.8                 |
| <b>2''</b>        | 121.9                                                                                       | 121.8                                                                                       | 130.7                 |
| <b>3''</b>        | 108.2                                                                                       | 106.7                                                                                       | 116.2                 |
| <b>4''</b>        | 145.6                                                                                       | 145.3                                                                                       | 156.9                 |
| <b>5''</b>        | 106.9                                                                                       | 107.3                                                                                       | 116.2                 |
| <b>6''</b>        | 122.3                                                                                       | 122.5                                                                                       | 130.7                 |
| <b>7''</b>        | 32.5                                                                                        | 31.1                                                                                        | 35.7                  |
| <b>8''</b>        | 33.8                                                                                        | 37.0                                                                                        | 42.6                  |
| <b>1'''</b>       | 126.5                                                                                       | 121.0                                                                                       | 134.5                 |
| <b>2'''</b>       | 119.5                                                                                       | 118.7                                                                                       | 128.5                 |
| <b>3'''</b>       | 107.3                                                                                       | 106.9                                                                                       | 116.1                 |
| <b>4'''</b>       | 145.2                                                                                       | 145.5                                                                                       | 158.0                 |
| <b>5'''</b>       | 106.0                                                                                       | 106.5                                                                                       | 116.1                 |
| <b>6'''</b>       | 118.8                                                                                       | 118.8                                                                                       | 128.5                 |
| <b>7'''</b>       | 68.4                                                                                        | 68.4                                                                                        | 73.2                  |
| <b>8'''</b>       | 47.2                                                                                        | 41.2                                                                                        | 48.1                  |
| <b>3,5-OCH3</b>   | 51.2                                                                                        | 70.9                                                                                        | 56.8                  |
| <b>3',5'-OCH3</b> | 54.6                                                                                        | 51.8                                                                                        | 56.9                  |

## 18 NMR calculation data for compound 4.

**Table S10.** DP4+ probabilities obtained by correlating the calculated  $^{13}\text{C}$  and  $^1\text{H}$  NMR chemical shifts of the 4 possible diastereoisomers of compound **4** with the experimental NMR data of the isolated natural product.

|                           | $7'S^*,7''R^*,$<br>$7'''R^*,8'R^*$ | $7'S^*,7''S^*,$<br>$7'''S^*,8'R^*$ | $7'S^*,7''R^*,$<br>$7'''S^*,8'R^*$ | $7'S^*,7''S^*,$<br>$7'''R^*,8'R^*$ |
|---------------------------|------------------------------------|------------------------------------|------------------------------------|------------------------------------|
| <b>DP4+ Probabilities</b> | 0.00%                              | 0.00%                              | 100.00%                            | 0.00%                              |

**Table S11.** Calculated [GIAO-mPW1PW91/6-31G(d)-PCM//B3LYP/6-31G(d)]  $^1\text{H}$  NMR chemical shifts (in ppm), obtained for 4 diastereoisomers of compound **4**, and experimental data of the isolated natural product.

| Nuclei                 | $\delta_{\text{calc}}$               | $\delta_{\text{calc}}$               | $\delta_{\text{calc}}$               | $\delta_{\text{calc}}$               | $\delta_{\text{exp}}$ |
|------------------------|--------------------------------------|--------------------------------------|--------------------------------------|--------------------------------------|-----------------------|
|                        | $[7'S^*,7''R^*,$<br>$7'''R^*,8'R^*]$ | $[7'S^*,7''S^*,$<br>$7'''S^*,8'R^*]$ | $[7'S^*,7''R^*,$<br>$7'''S^*,8'R^*]$ | $[7'S^*,7''S^*,$<br>$7'''R^*,8'R^*]$ |                       |
| 2                      | 6.59                                 | 6.53                                 | 6.84                                 | 6.57                                 | 6.77                  |
| 7                      | 7.02                                 | 6.76                                 | 7.47                                 | 7.37                                 | 7.33                  |
| 2'                     | 5.66                                 | 6.82                                 | 6.45                                 | 6.59                                 | 6.33                  |
| 6'                     | 6.49                                 | 7.07                                 | 6.22                                 | 5.95                                 | 6.33                  |
| 7'                     | 5.25                                 | 4.67                                 | 4.87                                 | 4.61                                 | 4.87                  |
| 8'                     | 3.60                                 | 3.87                                 | 3.37                                 | 2.59                                 | 3.72                  |
| 2''                    | 7.15                                 | 7.40                                 | 7.46                                 | 7.07                                 | 7.14                  |
| 3''                    | 6.80                                 | 6.91                                 | 6.66                                 | 6.25                                 | 6.72                  |
| 5''                    | 6.38                                 | 6.73                                 | 6.81                                 | 6.89                                 | 6.72                  |
| 6''                    | 7.13                                 | 7.62                                 | 7.39                                 | 7.24                                 | 7.14                  |
| 7''                    | 5.03                                 | 5.19                                 | 5.11                                 | 5.09                                 | 4.68                  |
| 8a''                   | 3.29                                 | 2.70                                 | 3.23                                 | 3.33                                 | 3.39                  |
| 8b''                   | 4.08                                 | 3.58                                 | 3.22                                 | 4.05                                 | 3.39                  |
| 2'''                   | 7.49                                 | 7.55                                 | 7.21                                 | 7.25                                 | 6.96                  |
| 3'''                   | 6.71                                 | 6.87                                 | 6.74                                 | 6.89                                 | 6.67                  |
| 5'''                   | 6.91                                 | 6.78                                 | 6.92                                 | 6.70                                 | 6.67                  |
| 6'''                   | 7.54                                 | 7.26                                 | 7.44                                 | 7.25                                 | 6.96                  |
| 7'''                   | 4.85                                 | 4.42                                 | 4.84                                 | 5.02                                 | 4.53                  |
| 8a'''                  | 3.51                                 | 3.66                                 | 3.38                                 | 4.06                                 | 3.34                  |
| 8b'''                  | 2.87                                 | 2.91                                 | 3.29                                 | 3.12                                 | 3.25                  |
| 3',5'-OCH <sub>3</sub> | 3.66                                 | 3.89                                 | 3.90                                 | 4.18                                 | 3.68                  |
| 3-OCH <sub>3</sub>     | 3.97                                 | 3.95                                 | 4.04                                 | 4.15                                 | 3.92                  |
| 5-OCH <sub>3</sub>     | 4.05                                 | 3.89                                 | 3.49                                 | 3.63                                 | 3.58                  |

**Table S12.** Calculated [GIAO-mPW1PW91/6-31G(d)-PCM//B3LYP/6-31G(d)] <sup>13</sup>C NMR chemical shifts (in ppm), obtained for 4 diastereoisomers of compound **4**, and experimental data of the isolated natural product.

| Nuclei      | $\delta_{\text{calc}}$<br>[7''R*,7'''R*,<br>8aS] | $\delta_{\text{calc}}$<br>[7''S*,7'''S*,<br>8aS] | $\delta_{\text{calc}}$<br>[7''R*,7'''S*,<br>8aS] | $\delta_{\text{calc}}$<br>[7''S*,7'''R*,<br>8aS] | $\delta_{\text{exp}}$ |
|-------------|--------------------------------------------------|--------------------------------------------------|--------------------------------------------------|--------------------------------------------------|-----------------------|
| <b>1</b>    | 115.4                                            | 113.9                                            | 116.0                                            | 116.9                                            | 124.2                 |
| <b>2</b>    | 100.7                                            | 99.6                                             | 109.2                                            | 101.3                                            | 109.1                 |
| <b>3</b>    | 136.9                                            | 137.1                                            | 137.1                                            | 137.8                                            | 149.3                 |
| <b>4</b>    | 135.5                                            | 133.1                                            | 137.2                                            | 134.4                                            | 143.3                 |
| <b>5</b>    | 135.1                                            | 135.5                                            | 136.9                                            | 135.3                                            | 146.9                 |
| <b>6</b>    | 119.8                                            | 115.9                                            | 118.1                                            | 114.1                                            | 125.2                 |
| <b>7</b>    | 129.9                                            | 121.7                                            | 129.9                                            | 129.6                                            | 135.4                 |
| <b>8</b>    | 117.9                                            | 124.7                                            | 118.8                                            | 118.4                                            | 126.8                 |
| <b>9</b>    | 164.4                                            | 161.7                                            | 160.0                                            | 158.8                                            | 170.3                 |
| <b>1'</b>   | 126.9                                            | 129.0                                            | 126.9                                            | 125.2                                            | 135.3                 |
| <b>2'</b>   | 99.5                                             | 106.1                                            | 100.5                                            | 103.5                                            | 106.0                 |
| <b>3'</b>   | 136.5                                            | 135.7                                            | 136.6                                            | 136.3                                            | 149.0                 |
| <b>4'</b>   | 123.7                                            | 129.8                                            | 125.8                                            | 128.6                                            | 135.3                 |
| <b>5'</b>   | 137.6                                            | 137.7                                            | 137.0                                            | 137.3                                            | 149.0                 |
| <b>6'</b>   | 96.6                                             | 98.4                                             | 96.2                                             | 99.4                                             | 106.0                 |
| <b>7'</b>   | 36.4                                             | 36.0                                             | 38.0                                             | 37.7                                             | 41.4                  |
| <b>8'</b>   | 47.6                                             | 49.1                                             | 48.9                                             | 47.5                                             | 50.2                  |
| <b>9'</b>   | 163.6                                            | 165.2                                            | 162.3                                            | 166.7                                            | 174.3                 |
| <b>1''</b>  | 123.6                                            | 124.1                                            | 123.5                                            | 125.2                                            | 134.7                 |
| <b>2''</b>  | 117.5                                            | 119.3                                            | 119.6                                            | 118.2                                            | 128.4                 |
| <b>3''</b>  | 107.0                                            | 105.7                                            | 106.0                                            | 106.3                                            | 116.1                 |
| <b>4''</b>  | 145.5                                            | 144.9                                            | 145.5                                            | 145.1                                            | 158.0                 |
| <b>5''</b>  | 106.4                                            | 105.7                                            | 106.2                                            | 106.9                                            | 116.1                 |
| <b>6''</b>  | 118.3                                            | 118.4                                            | 119.6                                            | 117.8                                            | 128.4                 |
| <b>7''</b>  | 69.4                                             | 67.0                                             | 68.3                                             | 69.5                                             | 73.4                  |
| <b>8''</b>  | 47.2                                             | 47.1                                             | 48.1                                             | 46.7                                             | 48.4                  |
| <b>1'''</b> | 125.7                                            | 124.2                                            | 123.1                                            | 125.1                                            | 134.3                 |
| <b>2'''</b> | 119.2                                            | 118.9                                            | 119.0                                            | 118.9                                            | 128.4                 |
| <b>3'''</b> | 105.4                                            | 106.6                                            | 106.9                                            | 106.5                                            | 116.1                 |
| <b>4'''</b> | 144.9                                            | 145.5                                            | 145.8                                            | 144.4                                            | 157.9                 |
| <b>5'''</b> | 105.8                                            | 105.7                                            | 107.4                                            | 105.7                                            | 116.1                 |
| <b>6'''</b> | 119.4                                            | 120.8                                            | 119.5                                            | 118.7                                            | 128.4                 |
| <b>7'''</b> | 71.7                                             | 70.6                                             | 69.1                                             | 69.3                                             | 72.8                  |
| <b>8'''</b> | 49.7                                             | 43.6                                             | 44.1                                             | 46.4                                             | 48.0                  |



|                              |      |      |      |      |      |
|------------------------------|------|------|------|------|------|
| <b>3',5'-OCH<sub>3</sub></b> | 50.6 | 51.3 | 50.2 | 51.1 | 56.7 |
| <b>3-OCH<sub>3</sub></b>     | 50.5 | 50.2 | 52.1 | 51.1 | 56.8 |
| <b>5-OCH<sub>3</sub></b>     | 53.6 | 53.0 | 54.9 | 53.4 | 60.8 |

---

## 19 NMR calculation data for compound **5**.

**Table S13.** DP4+ probabilities obtained by correlating the calculated  $^{13}\text{C}$  and  $^1\text{H}$  NMR chemical shifts of both diastereoisomers of compound **5** with the experimental NMR data of the isolated natural product.

|                    | <i>7'S*,7'''R*,8'R*</i> | <i>7'S*,7'''S*,8'R*</i> |
|--------------------|-------------------------|-------------------------|
| DP4+ Probabilities | 0.00%                   | 100.00%                 |

**Table S14.** Calculated [GIAO-mPW1PW91/6-31G(d)-PCM//B3LYP/6-31G(d)]  $^1\text{H}$  NMR chemical shifts (in ppm), obtained for both diastereoisomers of compound **5**, and experimental data of the isolated natural product.

| Nuclei           | $\delta_{\text{calc}}$ [ <i>7'S,7'''R,8'R</i> ] | $\delta_{\text{calc}}$ [ <i>7'S,7'''S,8'R</i> ] | $\delta_{\text{exp}}$ |
|------------------|-------------------------------------------------|-------------------------------------------------|-----------------------|
| <b>2</b>         | 6.41                                            | 6.62                                            | 6.76                  |
| <b>7</b>         | 6.20                                            | 6.88                                            | 7.27                  |
| <b>7'</b>        | 5.08                                            | 5.31                                            | 4.90                  |
| <b>8'</b>        | 3.28                                            | 3.44                                            | 3.72                  |
| <b>2',6'</b>     | 6.04                                            | 6.24                                            | 6.33                  |
| <b>2'',6''</b>   | 7.06                                            | 7.17                                            | 6.94                  |
| <b>3'',5''</b>   | 6.65                                            | 6.67                                            | 6.66                  |
| <b>7''</b>       | 2.82                                            | 2.22                                            | 2.68                  |
| <b>8''</b>       | 3.46                                            | 3.70                                            | 3.38                  |
| <b>2''',6'''</b> | 7.39                                            | 7.52                                            | 6.98                  |
| <b>3''',5'''</b> | 6.53                                            | 6.85                                            | 6.67                  |
| <b>7'''</b>      | 4.79                                            | 3.12                                            | 4.52                  |
| <b>8a'''</b>     | 3.90                                            | 4.15                                            | 3.35                  |
| <b>8b'''</b>     | 3.22                                            | 3.35                                            | 3.26                  |
| <b>3'-OCH3</b>   | 4.06                                            | 4.05                                            | 3.70                  |
| <b>5'-OCH3</b>   | 3.39                                            | 3.87                                            | 3.70                  |
| <b>3-OCH3</b>    | 4.05                                            | 4.24                                            | 3.92                  |
| <b>5-OCH3</b>    | 4.05                                            | 4.11                                            | 3.53                  |

**Table S15.** Calculated [GIAO-mPW1PW91/6-31G(d)-PCM//B3LYP/6-31G(d)] <sup>13</sup>C NMR chemical shifts (in ppm), obtained for both diastereoisomers of compound **5**, and experimental data of the isolated natural product.

| Nuclei              | $\delta_{\text{calc}}$ [7'S,7'''R,8'R] | $\delta_{\text{calc}}$ [7'S,7'''S,8'R] | $\delta_{\text{exp}}$ |
|---------------------|----------------------------------------|----------------------------------------|-----------------------|
| 1                   | 116.1                                  | 116.3                                  | 124.2                 |
| 2                   | 110.1                                  | 102.2                                  | 109.1                 |
| 3                   | 135.5                                  | 136.7                                  | 149.3                 |
| 4                   | 137.0                                  | 135.3                                  | 143.2                 |
| 5                   | 136.8                                  | 135.3                                  | 147.0                 |
| 6                   | 119.4                                  | 119.9                                  | 125.3                 |
| 7                   | 124.9                                  | 127.5                                  | 135.0                 |
| 8                   | 121.5                                  | 121.5                                  | 127.1                 |
| 9                   | 163.4                                  | 162.9                                  | 170.0                 |
| 1'                  | 126.2                                  | 127.9                                  | 135.2                 |
| 2',6'               | 100.3                                  | 98.6                                   | 106.1                 |
| 3',5'               | 136.7                                  | 137.3                                  | 149.0                 |
| 4'                  | 126.0                                  | 124.5                                  | 135.3                 |
| 7'                  | 36.0                                   | 37.9                                   | 41.4                  |
| 8'                  | 47.7                                   | 49.0                                   | 50.1                  |
| 9'                  | 159.5                                  | 158.9                                  | 174.2                 |
| 1''                 | 117.8                                  | 120.1                                  | 131.4                 |
| 2'',6''             | 121.9                                  | 122.3                                  | 130.8                 |
| 3'',5''             | 107.4                                  | 107.7                                  | 116.2                 |
| 4''                 | 145.6                                  | 145.8                                  | 156.8                 |
| 7''                 | 28.7                                   | 31.8                                   | 35.6                  |
| 8''                 | 36.9                                   | 40.8                                   | 42.8                  |
| 1'''                | 123.3                                  | 125.9                                  | 134.4                 |
| 2''',6'''           | 119.2                                  | 121.3                                  | 128.4                 |
| 3''',5'''           | 106.3                                  | 123.8                                  | 116.0                 |
| 4'''                | 145.0                                  | 145.6                                  | 157.9                 |
| 7'''                | 68.7                                   | 70.8                                   | 72.8                  |
| 8'''                | 41.6                                   | 43.1                                   | 47.9                  |
| 3'-OCH <sub>3</sub> | 52.4                                   | 51.5                                   | 56.7                  |
| 5'-OCH <sub>3</sub> | 49.8                                   | 51.6                                   | 56.7                  |
| 3-OCH <sub>3</sub>  | 52.9                                   | 52.1                                   | 56.8                  |
| 5-OCH <sub>3</sub>  | 55.5                                   | 54.7                                   | 60.8                  |

## 20 Monte Carlo/MMFF force field calculations and Boltzmann population.

**Table S16.** Relative energy values (in kcal.mol<sup>-1</sup>) and Boltzmann population of the conformers obtained from the Monte Carlo/MMFF force field calculations for each stereoisomer considered for compound **1**.

| Conformers              | Relative energy values<br>(kcal.mol <sup>-1</sup> ) | Boltzmann population (%) |
|-------------------------|-----------------------------------------------------|--------------------------|
| <i>7''R*,7'''R*,8aS</i> |                                                     |                          |
| 1                       | 0.0000                                              | 8.5690                   |
| 2                       | 0.0209                                              | 8.2717                   |
| 3                       | 0.0209                                              | 8.2717                   |
| 4                       | 0.0209                                              | 8.2717                   |
| 5                       | 0.1650                                              | 6.4861                   |
| 6                       | 0.1650                                              | 6.4861                   |
| 7                       | 0.3273                                              | 4.9321                   |
| 8                       | 0.3273                                              | 4.9321                   |
| 9                       | 0.3459                                              | 4.7800                   |
| 10                      | 0.3459                                              | 4.7799                   |
| 11                      | 0.3615                                              | 4.6558                   |
| 12                      | 0.4595                                              | 3.9459                   |
| 13                      | 0.4945                                              | 3.7194                   |
| 14                      | 0.5574                                              | 3.3451                   |
| 15                      | 1.0433                                              | 1.4731                   |
| 16                      | 1.0433                                              | 1.4731                   |
| 17                      | 1.1197                                              | 1.2949                   |
| 18                      | 1.1429                                              | 1.2452                   |
| 19                      | 1.2035                                              | 1.1241                   |
| 20                      | 1.2035                                              | 1.1241                   |
| 21                      | 1.2553                                              | 1.0301                   |
| 22                      | 1.2553                                              | 1.0301                   |
| 23                      | 1.3343                                              | 0.9015                   |
| 24                      | 1.4165                                              | 0.7846                   |
| 25                      | 1.4165                                              | 0.7846                   |
| 26                      | 1.4191                                              | 0.7813                   |
| 27                      | 1.5008                                              | 0.6806                   |
| 28                      | 1.6659                                              | 0.5151                   |
| 29                      | 1.8394                                              | 0.3843                   |
| 30                      | 1.8853                                              | 0.3557                   |
| 31                      | 1.9914                                              | 0.2974                   |
| 32                      | 2.0386                                              | 0.2746                   |
| 33                      | 2.1857                                              | 0.2143                   |
| 34                      | 2.1909                                              | 0.2124                   |
| 35                      | 2.2144                                              | 0.2041                   |
| 36                      | 2.2621                                              | 0.1883                   |
| 37                      | 2.2718                                              | 0.1853                   |
| 38                      | 2.2718                                              | 0.1853                   |
| 39                      | 2.2820                                              | 0.1821                   |
| 40                      | 2.3211                                              | 0.1705                   |
| 41                      | 2.3881                                              | 0.1522                   |
| 42                      | 2.4206                                              | 0.1441                   |
| 43                      | 2.4947                                              | 0.1272                   |
| 44                      | 2.4947                                              | 0.1272                   |
| 45                      | 2.5237                                              | 0.1211                   |
| 46                      | 2.6646                                              | 0.0955                   |

|                      |        |        |
|----------------------|--------|--------|
| 47                   | 2.6761 | 0.0936 |
| 48                   | 2.6783 | 0.0933 |
| 49                   | 2.7046 | 0.0892 |
| 50                   | 2.7251 | 0.0862 |
| 51                   | 2.8813 | 0.0662 |
| 52                   | 2.9062 | 0.0635 |
| 53                   | 3.0604 | 0.0490 |
| 54                   | 3.3676 | 0.0291 |
| 55                   | 3.3801 | 0.0285 |
| 56                   | 3.4850 | 0.0239 |
| 57                   | 3.7031 | 0.0165 |
| 58                   | 4.0012 | 0.0100 |
| 59                   | 4.0098 | 0.0099 |
| 60                   | 4.3094 | 0.0059 |
| 61                   | 4.5103 | 0.0042 |
| 62                   | 4.5104 | 0.0042 |
| 63                   | 4.5996 | 0.0036 |
| 64                   | 4.6958 | 0.0031 |
| 65                   | 4.8275 | 0.0025 |
| 66                   | 5.0226 | 0.0018 |
| 67                   | 5.1306 | 0.0015 |
| 68                   | 5.5265 | 0.0008 |
| 69                   | 5.8014 | 0.0005 |
| 70                   | 6.0228 | 0.0003 |
| 71                   | 6.0292 | 0.0003 |
| 72                   | 6.0784 | 0.0003 |
| 73                   | 6.3552 | 0.0002 |
| 74                   | 6.3930 | 0.0002 |
| 75                   | 6.4049 | 0.0002 |
| 76                   | 6.5492 | 0.0001 |
| 77                   | 6.5593 | 0.0001 |
| 78                   | 6.6731 | 0.0001 |
| 79                   | 6.7380 | 0.0001 |
| 80                   | 6.8455 | 0.0001 |
| 81                   | 7.0074 | 0.0001 |
| 82                   | 7.2899 | 0.0000 |
| 83                   | 7.8838 | 0.0000 |
| 84                   | 8.0769 | 0.0000 |
| 85                   | 8.3550 | 0.0000 |
| 86                   | 8.4226 | 0.0000 |
| 87                   | 8.5591 | 0.0000 |
| 88                   | 8.5966 | 0.0000 |
| 89                   | 8.7835 | 0.0000 |
| 90                   | 8.8769 | 0.0000 |
| 91                   | 8.9235 | 0.0000 |
| 92                   | 8.9418 | 0.0000 |
| 93                   | 9.0179 | 0.0000 |
| 94                   | 9.0651 | 0.0000 |
| 95                   | 9.1651 | 0.0000 |
| 96                   | 9.1950 | 0.0000 |
| 97                   | 9.4030 | 0.0000 |
| 98                   | 9.7442 | 0.0000 |
| 99                   | 9.7557 | 0.0000 |
| 100                  | 9.8814 | 0.0000 |
| <b>7"S*,7"S*,8aS</b> |        |        |
| 1                    | 0.0000 | 0.5070 |
| 2                    | 0.2357 | 0.3406 |
| 3                    | 0.7660 | 0.1392 |

|    |        |        |
|----|--------|--------|
| 4  | 2.2771 | 0.0109 |
| 5  | 4.0911 | 0.0005 |
| 6  | 4.1949 | 0.0004 |
| 7  | 4.3348 | 0.0003 |
| 8  | 4.3611 | 0.0003 |
| 9  | 4.6933 | 0.0002 |
| 10 | 5.3188 | 0.0001 |
| 11 | 5.5829 | 0.0000 |
| 12 | 5.7793 | 0.0000 |
| 13 | 5.8108 | 0.0000 |
| 14 | 5.8557 | 0.0000 |
| 15 | 5.9016 | 0.0000 |
| 16 | 5.9063 | 0.0000 |
| 17 | 6.0269 | 0.0000 |
| 18 | 6.0399 | 0.0000 |
| 19 | 6.0619 | 0.0000 |
| 20 | 6.0686 | 0.0000 |
| 21 | 6.1820 | 0.0000 |
| 22 | 6.1903 | 0.0000 |
| 23 | 6.2597 | 0.0000 |
| 24 | 6.3062 | 0.0000 |
| 25 | 6.3076 | 0.0000 |
| 26 | 6.3247 | 0.0000 |
| 27 | 6.3474 | 0.0000 |
| 28 | 6.4593 | 0.0000 |
| 29 | 6.5036 | 0.0000 |
| 30 | 6.5567 | 0.0000 |
| 31 | 6.5767 | 0.0000 |
| 32 | 6.5838 | 0.0000 |
| 33 | 6.5841 | 0.0000 |
| 34 | 6.6344 | 0.0000 |
| 35 | 6.6880 | 0.0000 |
| 36 | 6.7029 | 0.0000 |
| 37 | 6.8126 | 0.0000 |
| 38 | 6.8721 | 0.0000 |
| 39 | 6.9561 | 0.0000 |
| 40 | 7.0296 | 0.0000 |
| 41 | 7.0479 | 0.0000 |
| 42 | 7.1392 | 0.0000 |
| 43 | 7.1733 | 0.0000 |
| 44 | 7.1765 | 0.0000 |
| 45 | 7.1773 | 0.0000 |
| 46 | 7.2686 | 0.0000 |
| 47 | 7.2988 | 0.0000 |
| 48 | 7.3906 | 0.0000 |
| 49 | 7.4024 | 0.0000 |
| 50 | 7.4029 | 0.0000 |
| 51 | 7.4817 | 0.0000 |
| 52 | 7.4869 | 0.0000 |
| 53 | 7.5580 | 0.0000 |
| 54 | 7.6024 | 0.0000 |
| 55 | 7.6347 | 0.0000 |
| 56 | 7.7017 | 0.0000 |
| 57 | 7.7797 | 0.0000 |
| 58 | 7.8838 | 0.0000 |
| 59 | 7.9804 | 0.0000 |
| 60 | 8.1489 | 0.0000 |
| 61 | 8.1489 | 0.0000 |

|                        |        |        |
|------------------------|--------|--------|
| 62                     | 8.1589 | 0.0000 |
| 63                     | 8.1803 | 0.0000 |
| 64                     | 8.1906 | 0.0000 |
| 65                     | 8.2355 | 0.0000 |
| 66                     | 8.3627 | 0.0000 |
| 67                     | 8.3654 | 0.0000 |
| 68                     | 8.3905 | 0.0000 |
| 69                     | 8.4071 | 0.0000 |
| 70                     | 8.4459 | 0.0000 |
| 71                     | 8.5094 | 0.0000 |
| 72                     | 8.5094 | 0.0000 |
| 73                     | 8.5302 | 0.0000 |
| 74                     | 8.5506 | 0.0000 |
| 75                     | 8.6679 | 0.0000 |
| 76                     | 8.7056 | 0.0000 |
| 77                     | 8.9559 | 0.0000 |
| 78                     | 8.9661 | 0.0000 |
| 79                     | 9.0165 | 0.0000 |
| 80                     | 9.0853 | 0.0000 |
| 81                     | 9.1243 | 0.0000 |
| 82                     | 9.1441 | 0.0000 |
| 83                     | 9.1766 | 0.0000 |
| 84                     | 9.2273 | 0.0000 |
| 85                     | 9.3385 | 0.0000 |
| 86                     | 9.3644 | 0.0000 |
| 87                     | 9.3947 | 0.0000 |
| 88                     | 9.5655 | 0.0000 |
| 89                     | 9.5848 | 0.0000 |
| 90                     | 9.6017 | 0.0000 |
| 91                     | 9.6368 | 0.0000 |
| 92                     | 9.7162 | 0.0000 |
| 93                     | 9.7164 | 0.0000 |
| 94                     | 9.7294 | 0.0000 |
| 95                     | 9.7823 | 0.0000 |
| 96                     | 9.8809 | 0.0000 |
| 97                     | 9.8945 | 0.0000 |
| 98                     | 9.9546 | 0.0000 |
| 99                     | 9.9939 | 0.0000 |
| 100                    | 9.9939 | 0.0000 |
| <b>7''R*,7''S*,8aS</b> |        |        |
| 1                      | 0.0000 | 0.4785 |
| 2                      | 0.1715 | 0.3583 |
| 3                      | 1.6139 | 0.0314 |
| 4                      | 1.7959 | 0.0231 |
| 5                      | 1.8344 | 0.0216 |
| 6                      | 1.8980 | 0.0194 |
| 7                      | 1.9399 | 0.0181 |
| 8                      | 1.9676 | 0.0173 |
| 9                      | 2.1054 | 0.0137 |
| 10                     | 3.0161 | 0.0029 |
| 11                     | 3.0593 | 0.0027 |
| 12                     | 3.1241 | 0.0025 |
| 13                     | 3.2690 | 0.0019 |
| 14                     | 3.4246 | 0.0015 |
| 15                     | 3.4477 | 0.0014 |
| 16                     | 3.4625 | 0.0014 |
| 17                     | 3.5293 | 0.0012 |
| 18                     | 3.8456 | 0.0007 |

|    |        |        |
|----|--------|--------|
| 19 | 4.3533 | 0.0003 |
| 20 | 4.4129 | 0.0003 |
| 21 | 4.4263 | 0.0003 |
| 22 | 4.7272 | 0.0002 |
| 23 | 4.9532 | 0.0001 |
| 24 | 4.9620 | 0.0001 |
| 25 | 4.9773 | 0.0001 |
| 26 | 5.2757 | 0.0001 |
| 27 | 5.2757 | 0.0001 |
| 28 | 5.4126 | 0.0001 |
| 29 | 5.4212 | 0.0001 |
| 30 | 5.4848 | 0.0000 |
| 31 | 5.4930 | 0.0000 |
| 32 | 5.4996 | 0.0000 |
| 33 | 5.6077 | 0.0000 |
| 34 | 5.6176 | 0.0000 |
| 35 | 5.6402 | 0.0000 |
| 36 | 5.6469 | 0.0000 |
| 37 | 5.7228 | 0.0000 |
| 38 | 5.7945 | 0.0000 |
| 39 | 5.8213 | 0.0000 |
| 40 | 5.9035 | 0.0000 |
| 41 | 5.9721 | 0.0000 |
| 42 | 6.0904 | 0.0000 |
| 43 | 6.2142 | 0.0000 |
| 44 | 6.2142 | 0.0000 |
| 45 | 6.2203 | 0.0000 |
| 46 | 6.3783 | 0.0000 |
| 47 | 6.3860 | 0.0000 |
| 48 | 6.4346 | 0.0000 |
| 49 | 6.5282 | 0.0000 |
| 50 | 6.5282 | 0.0000 |
| 51 | 6.5282 | 0.0000 |
| 52 | 6.5916 | 0.0000 |
| 53 | 6.6627 | 0.0000 |
| 54 | 6.9334 | 0.0000 |
| 55 | 6.9741 | 0.0000 |
| 56 | 6.9881 | 0.0000 |
| 57 | 7.2907 | 0.0000 |
| 58 | 7.4147 | 0.0000 |
| 59 | 7.4428 | 0.0000 |
| 60 | 7.4781 | 0.0000 |
| 61 | 7.5432 | 0.0000 |
| 62 | 7.5432 | 0.0000 |
| 63 | 7.6305 | 0.0000 |
| 64 | 7.7574 | 0.0000 |
| 65 | 7.7961 | 0.0000 |
| 66 | 7.8515 | 0.0000 |
| 67 | 7.8831 | 0.0000 |
| 68 | 7.9897 | 0.0000 |
| 69 | 8.0404 | 0.0000 |
| 70 | 8.1427 | 0.0000 |
| 71 | 8.2598 | 0.0000 |
| 72 | 8.3844 | 0.0000 |
| 73 | 8.4197 | 0.0000 |
| 74 | 8.5094 | 0.0000 |
| 75 | 8.5094 | 0.0000 |
| 76 | 8.5569 | 0.0000 |



|                      |        |        |
|----------------------|--------|--------|
| 77                   | 8.5899 | 0.0000 |
| 78                   | 8.6345 | 0.0000 |
| 79                   | 8.6769 | 0.0000 |
| 80                   | 8.6930 | 0.0000 |
| 81                   | 8.7489 | 0.0000 |
| 82                   | 8.7876 | 0.0000 |
| 83                   | 8.9889 | 0.0000 |
| 84                   | 9.0014 | 0.0000 |
| 85                   | 9.0038 | 0.0000 |
| 86                   | 9.1194 | 0.0000 |
| 87                   | 9.1366 | 0.0000 |
| 88                   | 9.1779 | 0.0000 |
| 89                   | 9.1903 | 0.0000 |
| 90                   | 9.2469 | 0.0000 |
| 91                   | 9.2483 | 0.0000 |
| 92                   | 9.2871 | 0.0000 |
| 93                   | 9.2872 | 0.0000 |
| 94                   | 9.3736 | 0.0000 |
| 95                   | 9.4640 | 0.0000 |
| 96                   | 9.4946 | 0.0000 |
| 97                   | 9.4946 | 0.0000 |
| 98                   | 9.5000 | 0.0000 |
| 99                   | 9.6790 | 0.0000 |
| 100                  | 9.9669 | 0.0000 |
| <b>7"S*,7"R*,8aS</b> |        |        |
| 1                    | 0.0000 | 0.2449 |
| 2                    | 0.1320 | 0.1960 |
| 3                    | 0.6308 | 0.0845 |
| 4                    | 0.6780 | 0.0780 |
| 5                    | 1.1641 | 0.0343 |
| 6                    | 1.1641 | 0.0343 |
| 7                    | 1.2035 | 0.0321 |
| 8                    | 1.2035 | 0.0321 |
| 9                    | 1.2244 | 0.0310 |
| 10                   | 1.2244 | 0.0310 |
| 11                   | 1.2612 | 0.0292 |
| 12                   | 1.2612 | 0.0292 |
| 13                   | 1.4257 | 0.0221 |
| 14                   | 1.5012 | 0.0194 |
| 15                   | 1.5012 | 0.0194 |
| 16                   | 1.9860 | 0.0086 |
| 17                   | 1.9860 | 0.0086 |
| 18                   | 2.0108 | 0.0082 |
| 19                   | 2.0108 | 0.0082 |
| 20                   | 2.0156 | 0.0082 |
| 21                   | 2.0156 | 0.0082 |
| 22                   | 2.0670 | 0.0075 |
| 23                   | 2.0670 | 0.0075 |
| 24                   | 2.2002 | 0.0060 |
| 25                   | 2.2307 | 0.0057 |
| 26                   | 2.7248 | 0.0025 |
| 27                   | 3.3742 | 0.0008 |
| 28                   | 3.4393 | 0.0007 |
| 29                   | 3.4739 | 0.0007 |
| 30                   | 3.9859 | 0.0003 |
| 31                   | 4.5069 | 0.0001 |
| 32                   | 4.6936 | 0.0001 |
| 33                   | 4.9698 | 0.0001 |

|    |        |        |
|----|--------|--------|
| 34 | 4.9833 | 0.0001 |
| 35 | 4.9833 | 0.0001 |
| 36 | 5.0324 | 0.0001 |
| 37 | 5.0547 | 0.0000 |
| 38 | 5.3279 | 0.0000 |
| 39 | 5.4244 | 0.0000 |
| 40 | 5.4981 | 0.0000 |
| 41 | 5.4988 | 0.0000 |
| 42 | 5.6296 | 0.0000 |
| 43 | 5.6988 | 0.0000 |
| 44 | 5.9575 | 0.0000 |
| 45 | 5.9883 | 0.0000 |
| 46 | 6.2254 | 0.0000 |
| 47 | 6.3318 | 0.0000 |
| 48 | 6.3478 | 0.0000 |
| 49 | 6.3580 | 0.0000 |
| 50 | 6.4715 | 0.0000 |
| 51 | 6.4715 | 0.0000 |
| 52 | 6.5614 | 0.0000 |
| 53 | 6.7668 | 0.0000 |
| 54 | 6.9544 | 0.0000 |
| 55 | 7.0048 | 0.0000 |
| 56 | 7.1901 | 0.0000 |
| 57 | 7.3691 | 0.0000 |
| 58 | 7.7395 | 0.0000 |
| 59 | 7.8269 | 0.0000 |
| 60 | 7.8836 | 0.0000 |
| 61 | 7.9716 | 0.0000 |
| 62 | 8.0099 | 0.0000 |
| 63 | 8.1025 | 0.0000 |
| 64 | 8.2941 | 0.0000 |
| 65 | 8.3668 | 0.0000 |
| 66 | 8.3787 | 0.0000 |
| 67 | 8.3787 | 0.0000 |
| 68 | 8.4182 | 0.0000 |
| 69 | 8.4803 | 0.0000 |
| 70 | 8.5165 | 0.0000 |
| 71 | 8.5900 | 0.0000 |
| 72 | 8.6343 | 0.0000 |
| 73 | 8.7250 | 0.0000 |
| 74 | 8.7255 | 0.0000 |
| 75 | 8.7345 | 0.0000 |
| 76 | 8.7733 | 0.0000 |
| 77 | 8.8228 | 0.0000 |
| 78 | 8.8833 | 0.0000 |
| 79 | 8.9197 | 0.0000 |
| 80 | 8.9387 | 0.0000 |
| 81 | 8.9454 | 0.0000 |
| 82 | 8.9504 | 0.0000 |
| 83 | 8.9840 | 0.0000 |
| 84 | 9.0548 | 0.0000 |
| 85 | 9.1032 | 0.0000 |
| 86 | 9.1089 | 0.0000 |
| 87 | 9.1437 | 0.0000 |
| 88 | 9.1440 | 0.0000 |
| 89 | 9.1511 | 0.0000 |
| 90 | 9.2641 | 0.0000 |
| 91 | 9.3626 | 0.0000 |

|            |        |        |
|------------|--------|--------|
| <b>92</b>  | 9.5135 | 0.0000 |
| <b>93</b>  | 9.5521 | 0.0000 |
| <b>94</b>  | 9.5809 | 0.0000 |
| <b>95</b>  | 9.5944 | 0.0000 |
| <b>96</b>  | 9.6309 | 0.0000 |
| <b>97</b>  | 9.8343 | 0.0000 |
| <b>98</b>  | 9.8570 | 0.0000 |
| <b>99</b>  | 9.9638 | 0.0000 |
| <b>100</b> | 9.9709 | 0.0000 |

**Table S17.** Relative energy values (in kcal.mol<sup>-1</sup>) and Boltzmann population of the conformers obtained from the Monte Carlo/MMFF force field calculations for each stereoisomer considered for compound **2**.

| Conformers                            | Relative energy values<br>(kcal.mol <sup>-1</sup> ) | Boltzmann population (%) |
|---------------------------------------|-----------------------------------------------------|--------------------------|
| <i>7S*,7'S*,7''S*,7'''R*,8S*,8'S*</i> |                                                     |                          |
| 1                                     | 0.0000                                              | 33.0733                  |
| 2                                     | 0.0000                                              | 33.0733                  |
| 3                                     | 0.0000                                              | 33.0733                  |
| 4                                     | 2.2981                                              | 0.6841                   |
| 5                                     | 3.8945                                              | 0.0462                   |
| 6                                     | 3.8945                                              | 0.0462                   |
| 7                                     | 6.0466                                              | 0.0012                   |
| 8                                     | 6.1484                                              | 0.0010                   |
| 9                                     | 6.7018                                              | 0.0004                   |
| 10                                    | 6.7018                                              | 0.0004                   |
| 11                                    | 7.3384                                              | 0.0001                   |
| 12                                    | 7.3420                                              | 0.0001                   |
| 13                                    | 7.7160                                              | 0.0001                   |
| 14                                    | 8.1906                                              | 0.0000                   |
| 15                                    | 8.3709                                              | 0.0000                   |
| 16                                    | 8.6442                                              | 0.0000                   |
| 17                                    | 8.8499                                              | 0.0000                   |
| 18                                    | 9.1383                                              | 0.0000                   |
| 19                                    | 9.2595                                              | 0.0000                   |
| 20                                    | 9.6297                                              | 0.0000                   |
| 21                                    | 9.6824                                              | 0.0000                   |
| 22                                    | 9.8625                                              | 0.0000                   |
| 23                                    | 9.9175                                              | 0.0000                   |
| 24                                    | 9.9527                                              | 0.0000                   |
| 25                                    | 10.0108                                             | 0.0000                   |
| 26                                    | 10.0780                                             | 0.0000                   |
| 27                                    | 10.3156                                             | 0.0000                   |
| 28                                    | 10.9182                                             | 0.0000                   |
| 29                                    | 11.0984                                             | 0.0000                   |
| 30                                    | 11.1585                                             | 0.0000                   |
| 31                                    | 11.5216                                             | 0.0000                   |
| 32                                    | 11.7046                                             | 0.0000                   |
| 33                                    | 11.7425                                             | 0.0000                   |
| 34                                    | 12.3711                                             | 0.0000                   |
| 35                                    | 12.4805                                             | 0.0000                   |
| 36                                    | 12.5573                                             | 0.0000                   |
| 37                                    | 12.5825                                             | 0.0000                   |
| 38                                    | 13.0508                                             | 0.0000                   |
| 39                                    | 13.3534                                             | 0.0000                   |
| 40                                    | 13.5627                                             | 0.0000                   |
| 41                                    | 13.6613                                             | 0.0000                   |
| 42                                    | 14.5160                                             | 0.0000                   |
| 43                                    | 14.5310                                             | 0.0000                   |
| 44                                    | 14.5759                                             | 0.0000                   |
| 45                                    | 14.6425                                             | 0.0000                   |
| 46                                    | 14.7525                                             | 0.0000                   |
| 47                                    | 15.4807                                             | 0.0000                   |
| 48                                    | 15.6262                                             | 0.0000                   |
| 49                                    | 15.9843                                             | 0.0000                   |

|                                       |         |         |
|---------------------------------------|---------|---------|
| 50                                    | 16.1476 | 0.0000  |
| 51                                    | 16.3640 | 0.0000  |
| 52                                    | 16.8362 | 0.0000  |
| 53                                    | 16.9262 | 0.0000  |
| 54                                    | 17.1464 | 0.0000  |
| 55                                    | 17.2401 | 0.0000  |
| 56                                    | 17.5103 | 0.0000  |
| 57                                    | 17.7214 | 0.0000  |
| 58                                    | 18.3201 | 0.0000  |
| 59                                    | 18.4538 | 0.0000  |
| 60                                    | 18.6685 | 0.0000  |
| 61                                    | 18.6686 | 0.0000  |
| 62                                    | 19.0129 | 0.0000  |
| 63                                    | 19.2383 | 0.0000  |
| 64                                    | 19.3026 | 0.0000  |
| 65                                    | 20.1032 | 0.0000  |
| 66                                    | 20.2629 | 0.0000  |
| 67                                    | 20.3339 | 0.0000  |
| 68                                    | 20.8890 | 0.0000  |
| 69                                    | 20.9855 | 0.0000  |
| 70                                    | 21.0685 | 0.0000  |
| 71                                    | 21.1572 | 0.0000  |
| 72                                    | 21.3028 | 0.0000  |
| 73                                    | 21.4586 | 0.0000  |
| 74                                    | 21.6990 | 0.0000  |
| 75                                    | 21.8724 | 0.0000  |
| 76                                    | 22.1640 | 0.0000  |
| 77                                    | 22.2880 | 0.0000  |
| 78                                    | 22.5256 | 0.0000  |
| 79                                    | 22.6523 | 0.0000  |
| 80                                    | 22.7300 | 0.0000  |
| 81                                    | 23.0933 | 0.0000  |
| 82                                    | 23.1548 | 0.0000  |
| 83                                    | 23.1925 | 0.0000  |
| 84                                    | 23.4465 | 0.0000  |
| 85                                    | 23.6105 | 0.0000  |
| 86                                    | 23.9486 | 0.0000  |
| 87                                    | 24.7109 | 0.0000  |
| 88                                    | 26.1529 | 0.0000  |
| 89                                    | 26.7070 | 0.0000  |
| 90                                    | 28.3617 | 0.0000  |
| 91                                    | 28.3682 | 0.0000  |
| 92                                    | 28.4097 | 0.0000  |
| 93                                    | 28.5713 | 0.0000  |
| 94                                    | 28.6873 | 0.0000  |
| 95                                    | 28.7357 | 0.0000  |
| 96                                    | 30.5853 | 0.0000  |
| 97                                    | 31.4692 | 0.0000  |
| 98                                    | 31.5103 | 0.0000  |
| 99                                    | 34.6216 | 0.0000  |
| 100                                   | 38.1970 | 0.0000  |
| <i>7S*,7'S*,7''R*,7'''S*,8S*,8'S*</i> |         |         |
| 1                                     | 0.0000  | 99.2048 |
| 2                                     | 3.1036  | 0.5269  |
| 3                                     | 3.7332  | 0.1821  |
| 4                                     | 4.5128  | 0.0488  |
| 5                                     | 5.5730  | 0.0082  |
| 6                                     | 5.6671  | 0.0070  |

|    |         |        |
|----|---------|--------|
| 7  | 5.8661  | 0.0050 |
| 8  | 5.9651  | 0.0042 |
| 9  | 5.9878  | 0.0041 |
| 10 | 6.3251  | 0.0023 |
| 11 | 6.5329  | 0.0016 |
| 12 | 6.6221  | 0.0014 |
| 13 | 6.7507  | 0.0011 |
| 14 | 6.7719  | 0.0011 |
| 15 | 7.0083  | 0.0007 |
| 16 | 7.1128  | 0.0006 |
| 17 | 8.6949  | 0.0000 |
| 18 | 8.6986  | 0.0000 |
| 19 | 9.0675  | 0.0000 |
| 20 | 9.0748  | 0.0000 |
| 21 | 9.1269  | 0.0000 |
| 22 | 9.2703  | 0.0000 |
| 23 | 9.4095  | 0.0000 |
| 24 | 10.0989 | 0.0000 |
| 25 | 10.6310 | 0.0000 |
| 26 | 11.1979 | 0.0000 |
| 27 | 11.2705 | 0.0000 |
| 28 | 11.2706 | 0.0000 |
| 29 | 11.6894 | 0.0000 |
| 30 | 11.9173 | 0.0000 |
| 31 | 12.0665 | 0.0000 |
| 32 | 12.0665 | 0.0000 |
| 33 | 13.2429 | 0.0000 |
| 34 | 13.9489 | 0.0000 |
| 35 | 14.0532 | 0.0000 |
| 36 | 14.5127 | 0.0000 |
| 37 | 14.5500 | 0.0000 |
| 38 | 14.5500 | 0.0000 |
| 39 | 14.6209 | 0.0000 |
| 40 | 14.8192 | 0.0000 |
| 41 | 14.8228 | 0.0000 |
| 42 | 14.8479 | 0.0000 |
| 43 | 14.9307 | 0.0000 |
| 44 | 15.9085 | 0.0000 |
| 45 | 16.1337 | 0.0000 |
| 46 | 16.2588 | 0.0000 |
| 47 | 16.7345 | 0.0000 |
| 48 | 16.7938 | 0.0000 |
| 49 | 16.9281 | 0.0000 |
| 50 | 17.0139 | 0.0000 |
| 51 | 17.2849 | 0.0000 |
| 52 | 17.5994 | 0.0000 |
| 53 | 17.9474 | 0.0000 |
| 54 | 18.1482 | 0.0000 |
| 55 | 18.3550 | 0.0000 |
| 56 | 18.4008 | 0.0000 |
| 57 | 18.8640 | 0.0000 |
| 58 | 19.5154 | 0.0000 |
| 59 | 19.5587 | 0.0000 |
| 60 | 19.9580 | 0.0000 |
| 61 | 19.9585 | 0.0000 |
| 62 | 20.7516 | 0.0000 |
| 63 | 20.8207 | 0.0000 |
| 64 | 21.1796 | 0.0000 |

|                                       |         |         |
|---------------------------------------|---------|---------|
| 65                                    | 21.3844 | 0.0000  |
| 66                                    | 21.3973 | 0.0000  |
| 67                                    | 21.7080 | 0.0000  |
| 68                                    | 22.0108 | 0.0000  |
| 69                                    | 22.0898 | 0.0000  |
| 70                                    | 22.4763 | 0.0000  |
| 71                                    | 24.0812 | 0.0000  |
| 72                                    | 24.4194 | 0.0000  |
| 73                                    | 28.7728 | 0.0000  |
| 74                                    | 28.8256 | 0.0000  |
| 75                                    | 28.9203 | 0.0000  |
| 76                                    | 29.9774 | 0.0000  |
| 77                                    | 31.4242 | 0.0000  |
| 78                                    | 31.4361 | 0.0000  |
| 79                                    | 31.6444 | 0.0000  |
| 80                                    | 31.9760 | 0.0000  |
| 81                                    | 32.0791 | 0.0000  |
| 82                                    | 32.2635 | 0.0000  |
| 83                                    | 32.7862 | 0.0000  |
| 84                                    | 33.0537 | 0.0000  |
| 85                                    | 33.0681 | 0.0000  |
| 86                                    | 33.1837 | 0.0000  |
| 87                                    | 33.2172 | 0.0000  |
| 88                                    | 33.4049 | 0.0000  |
| 89                                    | 33.6821 | 0.0000  |
| 90                                    | 35.0170 | 0.0000  |
| 91                                    | 35.3334 | 0.0000  |
| 92                                    | 35.8367 | 0.0000  |
| 93                                    | 36.7811 | 0.0000  |
| 94                                    | 36.9757 | 0.0000  |
| 95                                    | 37.1403 | 0.0000  |
| 96                                    | 37.6950 | 0.0000  |
| 97                                    | 38.5137 | 0.0000  |
| 98                                    | 45.8392 | 0.0000  |
| 99                                    | 48.1850 | 0.0000  |
| 100                                   | 48.4624 | 0.0000  |
| <b>7S*,7'S*,7''R*,7'''R*,8S*,8'S*</b> |         |         |
| 1                                     | 0.0000  | 17.2060 |
| 2                                     | 0.0000  | 17.2060 |
| 3                                     | 0.1854  | 12.5841 |
| 4                                     | 0.5260  | 7.0820  |
| 5                                     | 0.5260  | 7.0820  |
| 6                                     | 0.6418  | 5.8245  |
| 7                                     | 0.8343  | 4.2087  |
| 8                                     | 0.8343  | 4.2087  |
| 9                                     | 0.9364  | 3.5429  |
| 10                                    | 1.1342  | 2.5372  |
| 11                                    | 1.1342  | 2.5372  |
| 12                                    | 1.2482  | 2.0932  |
| 13                                    | 1.3044  | 1.9036  |
| 14                                    | 1.3122  | 1.8787  |
| 15                                    | 1.4268  | 1.5485  |
| 16                                    | 1.5093  | 1.3473  |
| 17                                    | 1.6752  | 1.0183  |
| 18                                    | 1.7109  | 0.9587  |
| 19                                    | 1.9086  | 0.6867  |
| 20                                    | 1.9582  | 0.6315  |
| 21                                    | 2.0098  | 0.5789  |

|    |        |        |
|----|--------|--------|
| 22 | 2.0208 | 0.5683 |
| 23 | 2.0896 | 0.5059 |
| 24 | 2.1861 | 0.4299 |
| 25 | 2.4009 | 0.2992 |
| 26 | 2.6647 | 0.1917 |
| 27 | 2.6791 | 0.1871 |
| 28 | 3.0750 | 0.0959 |
| 29 | 3.0913 | 0.0933 |
| 30 | 3.1356 | 0.0866 |
| 31 | 3.1735 | 0.0812 |
| 32 | 3.2582 | 0.0704 |
| 33 | 3.2582 | 0.0704 |
| 34 | 3.2862 | 0.0671 |
| 35 | 3.4086 | 0.0546 |
| 36 | 3.6292 | 0.0376 |
| 37 | 3.6591 | 0.0358 |
| 38 | 3.6726 | 0.0350 |
| 39 | 3.6772 | 0.0347 |
| 40 | 3.7223 | 0.0322 |
| 41 | 3.7263 | 0.0320 |
| 42 | 3.7506 | 0.0307 |
| 43 | 3.7851 | 0.0289 |
| 44 | 3.8065 | 0.0279 |
| 45 | 3.8228 | 0.0272 |
| 46 | 3.8469 | 0.0261 |
| 47 | 3.9025 | 0.0237 |
| 48 | 4.0025 | 0.0200 |
| 49 | 4.1504 | 0.0156 |
| 50 | 4.2431 | 0.0134 |
| 51 | 4.3138 | 0.0119 |
| 52 | 4.3801 | 0.0106 |
| 53 | 4.5164 | 0.0084 |
| 54 | 4.5222 | 0.0083 |
| 55 | 4.6074 | 0.0072 |
| 56 | 4.6558 | 0.0067 |
| 57 | 4.6720 | 0.0065 |
| 58 | 4.7008 | 0.0062 |
| 59 | 4.7136 | 0.0060 |
| 60 | 4.7777 | 0.0054 |
| 61 | 4.8986 | 0.0044 |
| 62 | 4.9426 | 0.0041 |
| 63 | 4.9434 | 0.0041 |
| 64 | 4.9434 | 0.0041 |
| 65 | 5.2115 | 0.0026 |
| 66 | 5.2377 | 0.0025 |
| 67 | 5.3140 | 0.0022 |
| 68 | 5.3351 | 0.0021 |
| 69 | 5.6559 | 0.0012 |
| 70 | 5.6842 | 0.0012 |
| 71 | 5.6842 | 0.0012 |
| 72 | 5.7859 | 0.0010 |
| 73 | 5.8367 | 0.0009 |
| 74 | 5.9189 | 0.0008 |
| 75 | 5.9307 | 0.0008 |
| 76 | 6.0950 | 0.0006 |
| 77 | 6.3718 | 0.0004 |
| 78 | 6.6375 | 0.0002 |
| 79 | 6.7636 | 0.0002 |



|                                       |        |         |
|---------------------------------------|--------|---------|
| 80                                    | 6.8120 | 0.0002  |
| 81                                    | 6.8535 | 0.0002  |
| 82                                    | 7.0124 | 0.0001  |
| 83                                    | 7.1298 | 0.0001  |
| 84                                    | 7.2250 | 0.0001  |
| 85                                    | 7.3355 | 0.0001  |
| 86                                    | 7.4099 | 0.0001  |
| 87                                    | 7.6127 | 0.0000  |
| 88                                    | 7.6418 | 0.0000  |
| 89                                    | 7.6704 | 0.0000  |
| 90                                    | 7.7269 | 0.0000  |
| 91                                    | 7.9015 | 0.0000  |
| 92                                    | 7.9193 | 0.0000  |
| 93                                    | 8.0118 | 0.0000  |
| 94                                    | 8.0827 | 0.0000  |
| 95                                    | 8.4418 | 0.0000  |
| 96                                    | 8.5330 | 0.0000  |
| 97                                    | 9.3188 | 0.0000  |
| 98                                    | 9.3838 | 0.0000  |
| 99                                    | 9.8595 | 0.0000  |
| 100                                   | 9.9848 | 0.0000  |
| <i>7S*,7'S*,7''S*,7'''S*,8S*,8'S*</i> |        |         |
| 1                                     | 0.0000 | 34.0631 |
| 2                                     | 0.3462 | 18.9918 |
| 3                                     | 0.5899 | 12.5878 |
| 4                                     | 0.8730 | 7.8051  |
| 5                                     | 0.9178 | 7.2373  |
| 6                                     | 1.1296 | 5.0622  |
| 7                                     | 1.3614 | 3.4233  |
| 8                                     | 1.5178 | 2.6292  |
| 9                                     | 1.9374 | 1.2949  |
| 10                                    | 1.9535 | 1.2603  |
| 11                                    | 1.9535 | 1.2603  |
| 12                                    | 2.2358 | 0.7826  |
| 13                                    | 2.2796 | 0.7268  |
| 14                                    | 2.3001 | 0.7022  |
| 15                                    | 2.5982 | 0.4246  |
| 16                                    | 2.6188 | 0.4101  |
| 17                                    | 2.9096 | 0.2510  |
| 18                                    | 2.9248 | 0.2447  |
| 19                                    | 3.0450 | 0.1997  |
| 20                                    | 3.1567 | 0.1654  |
| 21                                    | 3.4223 | 0.1056  |
| 22                                    | 3.5775 | 0.0813  |
| 23                                    | 3.7401 | 0.0618  |
| 24                                    | 3.9252 | 0.0452  |
| 25                                    | 3.9507 | 0.0433  |
| 26                                    | 4.1727 | 0.0298  |
| 27                                    | 4.3700 | 0.0213  |
| 28                                    | 4.3701 | 0.0213  |
| 29                                    | 4.7690 | 0.0109  |
| 30                                    | 4.8707 | 0.0092  |
| 31                                    | 4.8707 | 0.0092  |
| 32                                    | 5.1156 | 0.0061  |
| 33                                    | 5.2038 | 0.0052  |
| 34                                    | 5.2759 | 0.0046  |
| 35                                    | 5.3476 | 0.0041  |
| 36                                    | 5.3476 | 0.0041  |

|    |        |        |
|----|--------|--------|
| 37 | 5.5131 | 0.0031 |
| 38 | 5.5853 | 0.0027 |
| 39 | 5.9041 | 0.0016 |
| 40 | 6.0998 | 0.0012 |
| 41 | 6.1286 | 0.0011 |
| 42 | 6.4258 | 0.0007 |
| 43 | 6.5823 | 0.0005 |
| 44 | 6.5901 | 0.0005 |
| 45 | 6.5968 | 0.0005 |
| 46 | 6.9547 | 0.0003 |
| 47 | 7.0770 | 0.0002 |
| 48 | 7.1739 | 0.0002 |
| 49 | 7.2017 | 0.0002 |
| 50 | 7.2479 | 0.0002 |
| 51 | 7.3289 | 0.0001 |
| 52 | 7.4301 | 0.0001 |
| 53 | 7.4332 | 0.0001 |
| 54 | 7.4417 | 0.0001 |
| 55 | 7.4699 | 0.0001 |
| 56 | 7.5034 | 0.0001 |
| 57 | 7.5038 | 0.0001 |
| 58 | 7.5473 | 0.0001 |
| 59 | 7.6497 | 0.0001 |
| 60 | 7.7486 | 0.0001 |
| 61 | 7.7859 | 0.0001 |
| 62 | 7.8215 | 0.0001 |
| 63 | 7.9647 | 0.0000 |
| 64 | 8.0631 | 0.0000 |
| 65 | 8.0674 | 0.0000 |
| 66 | 8.1469 | 0.0000 |
| 67 | 8.1719 | 0.0000 |
| 68 | 8.2715 | 0.0000 |
| 69 | 8.2827 | 0.0000 |
| 70 | 8.3292 | 0.0000 |
| 71 | 8.3300 | 0.0000 |
| 72 | 8.3441 | 0.0000 |
| 73 | 8.5853 | 0.0000 |
| 74 | 8.6069 | 0.0000 |
| 75 | 8.6689 | 0.0000 |
| 76 | 8.6708 | 0.0000 |
| 77 | 8.6882 | 0.0000 |
| 78 | 8.7274 | 0.0000 |
| 79 | 8.7383 | 0.0000 |
| 80 | 8.7771 | 0.0000 |
| 81 | 8.9583 | 0.0000 |
| 82 | 8.9877 | 0.0000 |
| 83 | 9.0802 | 0.0000 |
| 84 | 9.1610 | 0.0000 |
| 85 | 9.1669 | 0.0000 |
| 86 | 9.2127 | 0.0000 |
| 87 | 9.2951 | 0.0000 |
| 88 | 9.3543 | 0.0000 |
| 89 | 9.4714 | 0.0000 |
| 90 | 9.5032 | 0.0000 |
| 91 | 9.5395 | 0.0000 |
| 92 | 9.5966 | 0.0000 |
| 93 | 9.6446 | 0.0000 |
| 94 | 9.6781 | 0.0000 |

|            |        |        |
|------------|--------|--------|
| <b>95</b>  | 9.6820 | 0.0000 |
| <b>96</b>  | 9.6861 | 0.0000 |
| <b>97</b>  | 9.7356 | 0.0000 |
| <b>98</b>  | 9.8756 | 0.0000 |
| <b>99</b>  | 9.8835 | 0.0000 |
| <b>100</b> | 9.9630 | 0.0000 |

**Table S18.** Relative energy values (in kcal.mol<sup>-1</sup>) and Boltzmann population of the conformers obtained from the Monte Carlo/MMFF force field calculations for each stereoisomer considered for compound **3**.

| Conformers                 | Relative energy values<br>(kcal.mol <sup>-1</sup> ) | Boltzmann population (%) |
|----------------------------|-----------------------------------------------------|--------------------------|
| <i>7S,7'S,7'''S,8S,8'S</i> |                                                     |                          |
| 1                          | 0.0000                                              | 93.4641                  |
| 2                          | 2.2101                                              | 2.2427                   |
| 3                          | 2.4292                                              | 1.5493                   |
| 4                          | 2.8251                                              | 0.7942                   |
| 5                          | 3.1619                                              | 0.4499                   |
| 6                          | 3.4406                                              | 0.2811                   |
| 7                          | 3.6901                                              | 0.1845                   |
| 8                          | 3.7061                                              | 0.1796                   |
| 9                          | 3.7072                                              | 0.1792                   |
| 10                         | 3.9564                                              | 0.1177                   |
| 11                         | 3.9727                                              | 0.1145                   |
| 12                         | 4.5663                                              | 0.0420                   |
| 13                         | 4.5741                                              | 0.0415                   |
| 14                         | 4.6040                                              | 0.0395                   |
| 15                         | 4.6548                                              | 0.0362                   |
| 16                         | 4.8089                                              | 0.0279                   |
| 17                         | 4.8336                                              | 0.0268                   |
| 18                         | 4.9080                                              | 0.0236                   |
| 19                         | 4.9686                                              | 0.0213                   |
| 20                         | 4.9790                                              | 0.0210                   |
| 21                         | 5.0257                                              | 0.0194                   |
| 22                         | 5.2863                                              | 0.0125                   |
| 23                         | 5.2863                                              | 0.0125                   |
| 24                         | 5.2866                                              | 0.0125                   |
| 25                         | 5.3062                                              | 0.0121                   |
| 26                         | 5.4056                                              | 0.0102                   |
| 27                         | 5.4706                                              | 0.0091                   |
| 28                         | 5.6186                                              | 0.0071                   |
| 29                         | 5.6413                                              | 0.0069                   |
| 30                         | 5.8325                                              | 0.0050                   |
| 31                         | 5.8753                                              | 0.0046                   |
| 32                         | 6.0275                                              | 0.0036                   |
| 33                         | 6.0587                                              | 0.0034                   |
| 34                         | 6.0655                                              | 0.0033                   |
| 35                         | 6.0755                                              | 0.0033                   |
| 36                         | 6.1881                                              | 0.0027                   |
| 37                         | 6.1968                                              | 0.0027                   |
| 38                         | 6.1968                                              | 0.0027                   |
| 39                         | 6.2145                                              | 0.0026                   |
| 40                         | 6.2145                                              | 0.0026                   |
| 41                         | 6.3200                                              | 0.0022                   |
| 42                         | 6.3352                                              | 0.0021                   |
| 43                         | 6.3408                                              | 0.0021                   |
| 44                         | 6.3889                                              | 0.0019                   |
| 45                         | 6.4329                                              | 0.0018                   |
| 46                         | 6.4903                                              | 0.0016                   |
| 47                         | 6.5436                                              | 0.0015                   |
| 48                         | 6.7385                                              | 0.0011                   |
| 49                         | 6.8499                                              | 0.0009                   |

|                            |        |         |
|----------------------------|--------|---------|
| 50                         | 6.8988 | 0.0008  |
| 51                         | 6.9080 | 0.0008  |
| 52                         | 7.0848 | 0.0006  |
| 53                         | 7.0849 | 0.0006  |
| 54                         | 7.1077 | 0.0006  |
| 55                         | 7.1822 | 0.0005  |
| 56                         | 7.2074 | 0.0005  |
| 57                         | 7.2097 | 0.0005  |
| 58                         | 7.2909 | 0.0004  |
| 59                         | 7.2909 | 0.0004  |
| 60                         | 7.2950 | 0.0004  |
| 61                         | 7.3903 | 0.0004  |
| 62                         | 7.5238 | 0.0003  |
| 63                         | 7.5238 | 0.0003  |
| 64                         | 7.5512 | 0.0003  |
| 65                         | 7.6174 | 0.0002  |
| 66                         | 7.6566 | 0.0002  |
| 67                         | 7.7521 | 0.0002  |
| 68                         | 7.8356 | 0.0002  |
| 69                         | 7.8804 | 0.0002  |
| 70                         | 7.9416 | 0.0001  |
| 71                         | 8.0022 | 0.0001  |
| 72                         | 8.1363 | 0.0001  |
| 73                         | 8.2153 | 0.0001  |
| 74                         | 8.2622 | 0.0001  |
| 75                         | 8.3024 | 0.0001  |
| 76                         | 8.3795 | 0.0001  |
| 77                         | 8.4228 | 0.0001  |
| 78                         | 8.4647 | 0.0001  |
| 79                         | 8.5500 | 0.0001  |
| 80                         | 8.6197 | 0.0000  |
| 81                         | 8.6278 | 0.0000  |
| 82                         | 8.8834 | 0.0000  |
| 83                         | 8.9886 | 0.0000  |
| 84                         | 9.1247 | 0.0000  |
| 85                         | 9.2238 | 0.0000  |
| 86                         | 9.2462 | 0.0000  |
| 87                         | 9.3258 | 0.0000  |
| 88                         | 9.3299 | 0.0000  |
| 89                         | 9.4397 | 0.0000  |
| 90                         | 9.5381 | 0.0000  |
| 91                         | 9.5383 | 0.0000  |
| 92                         | 9.6322 | 0.0000  |
| 93                         | 9.6512 | 0.0000  |
| 94                         | 9.6924 | 0.0000  |
| 95                         | 9.7235 | 0.0000  |
| 96                         | 9.7302 | 0.0000  |
| 97                         | 9.8046 | 0.0000  |
| 98                         | 9.8853 | 0.0000  |
| 99                         | 9.9679 | 0.0000  |
| 100                        | 9.9747 | 0.0000  |
| <b>7R,7'R,7'''S,8R,8'R</b> |        |         |
| 1                          | 0.0000 | 45.6698 |
| 2                          | 0.3853 | 23.8357 |
| 3                          | 1.2617 | 5.4312  |
| 4                          | 1.3594 | 4.6051  |
| 5                          | 1.3594 | 4.6051  |
| 6                          | 1.5808 | 3.1694  |

|    |        |        |
|----|--------|--------|
| 7  | 1.5808 | 3.1694 |
| 8  | 2.0553 | 1.4230 |
| 9  | 2.1040 | 1.3106 |
| 10 | 2.2164 | 1.0843 |
| 11 | 2.5184 | 0.6513 |
| 12 | 2.6302 | 0.5393 |
| 13 | 2.7112 | 0.4704 |
| 14 | 2.7350 | 0.4519 |
| 15 | 2.7398 | 0.4482 |
| 16 | 2.7922 | 0.4103 |
| 17 | 2.8275 | 0.3865 |
| 18 | 2.8275 | 0.3865 |
| 19 | 2.8427 | 0.3767 |
| 20 | 2.8427 | 0.3767 |
| 21 | 2.9988 | 0.2895 |
| 22 | 3.2842 | 0.1788 |
| 23 | 3.5732 | 0.1098 |
| 24 | 3.5812 | 0.1083 |
| 25 | 3.7437 | 0.0824 |
| 26 | 3.9931 | 0.0541 |
| 27 | 4.2081 | 0.0376 |
| 28 | 4.2501 | 0.0350 |
| 29 | 4.2562 | 0.0347 |
| 30 | 4.2562 | 0.0347 |
| 31 | 4.2719 | 0.0338 |
| 32 | 4.4534 | 0.0249 |
| 33 | 4.4673 | 0.0243 |
| 34 | 4.5087 | 0.0226 |
| 35 | 4.6836 | 0.0169 |
| 36 | 4.7168 | 0.0159 |
| 37 | 4.7275 | 0.0157 |
| 38 | 5.0125 | 0.0097 |
| 39 | 5.0192 | 0.0096 |
| 40 | 5.1081 | 0.0082 |
| 41 | 5.1387 | 0.0078 |
| 42 | 5.3062 | 0.0059 |
| 43 | 5.4626 | 0.0045 |
| 44 | 5.5313 | 0.0040 |
| 45 | 5.5313 | 0.0040 |
| 46 | 5.5471 | 0.0039 |
| 47 | 5.5975 | 0.0036 |
| 48 | 5.7320 | 0.0029 |
| 49 | 5.9323 | 0.0020 |
| 50 | 6.0895 | 0.0016 |
| 51 | 6.0929 | 0.0016 |
| 52 | 6.1755 | 0.0014 |
| 53 | 6.1854 | 0.0013 |
| 54 | 6.3700 | 0.0010 |
| 55 | 6.3862 | 0.0010 |
| 56 | 6.5408 | 0.0007 |
| 57 | 6.6489 | 0.0006 |
| 58 | 6.9507 | 0.0004 |
| 59 | 6.9740 | 0.0004 |
| 60 | 6.9951 | 0.0003 |
| 61 | 7.0454 | 0.0003 |
| 62 | 7.1378 | 0.0003 |
| 63 | 7.1663 | 0.0003 |
| 64 | 7.2179 | 0.0002 |

|     |        |        |
|-----|--------|--------|
| 65  | 7.2517 | 0.0002 |
| 66  | 7.4042 | 0.0002 |
| 67  | 7.4079 | 0.0002 |
| 68  | 7.4919 | 0.0001 |
| 69  | 7.5502 | 0.0001 |
| 70  | 7.5502 | 0.0001 |
| 71  | 7.5675 | 0.0001 |
| 72  | 7.5675 | 0.0001 |
| 73  | 7.5675 | 0.0001 |
| 74  | 7.6641 | 0.0001 |
| 75  | 7.6828 | 0.0001 |
| 76  | 7.7473 | 0.0001 |
| 77  | 7.7473 | 0.0001 |
| 78  | 7.9727 | 0.0001 |
| 79  | 8.0519 | 0.0001 |
| 80  | 8.1326 | 0.0000 |
| 81  | 8.1663 | 0.0000 |
| 82  | 8.1826 | 0.0000 |
| 83  | 8.2414 | 0.0000 |
| 84  | 8.4790 | 0.0000 |
| 85  | 8.7227 | 0.0000 |
| 86  | 8.7690 | 0.0000 |
| 87  | 8.8022 | 0.0000 |
| 88  | 8.8107 | 0.0000 |
| 89  | 8.8768 | 0.0000 |
| 90  | 9.0088 | 0.0000 |
| 91  | 9.1232 | 0.0000 |
| 92  | 9.1565 | 0.0000 |
| 93  | 9.3744 | 0.0000 |
| 94  | 9.3814 | 0.0000 |
| 95  | 9.4500 | 0.0000 |
| 96  | 9.5003 | 0.0000 |
| 97  | 9.5575 | 0.0000 |
| 98  | 9.6430 | 0.0000 |
| 99  | 9.8197 | 0.0000 |
| 100 | 9.8594 | 0.0000 |

**Table S19.** Relative energy values (in kcal.mol<sup>-1</sup>) and Boltzmann population of the conformers obtained from the Monte Carlo/MMFF force field calculations for each stereoisomer considered for compound **4**.

| Conformers | Relative energy values<br>(kcal.mol <sup>-1</sup> ) | Boltzmann population (%) |
|------------|-----------------------------------------------------|--------------------------|
|            | <i>7'S*,7''R*,7'''R*,8'R*</i>                       |                          |
| 1          | 0.0000                                              | 24.8622                  |
| 2          | 0.0109                                              | 24.4095                  |
| 3          | 0.3115                                              | 14.6969                  |
| 4          | 0.4198                                              | 12.2420                  |
| 5          | 0.9989                                              | 4.6069                   |
| 6          | 1.0647                                              | 4.1227                   |
| 7          | 1.1904                                              | 3.3344                   |
| 8          | 1.3652                                              | 2.4825                   |
| 9          | 1.4071                                              | 2.3130                   |
| 10         | 1.4150                                              | 2.2825                   |
| 11         | 1.8529                                              | 1.0901                   |
| 12         | 1.8868                                              | 1.0294                   |
| 13         | 2.0824                                              | 0.7400                   |
| 14         | 2.2984                                              | 0.5139                   |
| 15         | 2.8728                                              | 0.1949                   |
| 16         | 3.0202                                              | 0.1520                   |
| 17         | 3.0584                                              | 0.1425                   |
| 18         | 3.1862                                              | 0.1149                   |
| 19         | 3.2599                                              | 0.1014                   |
| 20         | 3.3441                                              | 0.0880                   |
| 21         | 3.3920                                              | 0.0812                   |
| 22         | 3.5290                                              | 0.0644                   |
| 23         | 3.6000                                              | 0.0571                   |
| 24         | 3.7820                                              | 0.0420                   |
| 25         | 3.8571                                              | 0.0370                   |
| 26         | 3.9192                                              | 0.0333                   |
| 27         | 4.3471                                              | 0.0162                   |
| 28         | 4.3752                                              | 0.0154                   |
| 29         | 4.4399                                              | 0.0138                   |
| 30         | 4.4818                                              | 0.0129                   |
| 31         | 4.5525                                              | 0.0114                   |
| 32         | 4.5763                                              | 0.0110                   |
| 33         | 4.5884                                              | 0.0108                   |
| 34         | 4.5971                                              | 0.0106                   |
| 35         | 4.6440                                              | 0.0098                   |
| 36         | 4.6731                                              | 0.0093                   |
| 37         | 4.8513                                              | 0.0069                   |
| 38         | 4.9302                                              | 0.0061                   |
| 39         | 4.9598                                              | 0.0058                   |
| 40         | 4.9921                                              | 0.0055                   |
| 41         | 5.3387                                              | 0.0030                   |
| 42         | 5.5421                                              | 0.0022                   |
| 43         | 5.5995                                              | 0.0020                   |
| 44         | 5.7484                                              | 0.0015                   |
| 45         | 5.8858                                              | 0.0012                   |
| 46         | 5.9637                                              | 0.0011                   |
| 47         | 6.0079                                              | 0.0010                   |
| 48         | 6.0634                                              | 0.0009                   |
| 49         | 6.1413                                              | 0.0008                   |



|                               |        |         |
|-------------------------------|--------|---------|
| 50                            | 6.2065 | 0.0007  |
| 51                            | 6.3531 | 0.0005  |
| 52                            | 6.4410 | 0.0005  |
| 53                            | 6.4437 | 0.0005  |
| 54                            | 6.5028 | 0.0004  |
| 55                            | 6.5073 | 0.0004  |
| 56                            | 6.5279 | 0.0004  |
| 57                            | 6.6079 | 0.0004  |
| 58                            | 6.6727 | 0.0003  |
| 59                            | 6.7552 | 0.0003  |
| 60                            | 6.7994 | 0.0003  |
| 61                            | 7.0076 | 0.0002  |
| 62                            | 7.1417 | 0.0001  |
| 63                            | 7.2206 | 0.0001  |
| 64                            | 7.2346 | 0.0001  |
| 65                            | 7.3881 | 0.0001  |
| 66                            | 7.4542 | 0.0001  |
| 67                            | 7.5734 | 0.0001  |
| 68                            | 7.7071 | 0.0001  |
| 69                            | 7.7086 | 0.0001  |
| 70                            | 7.8340 | 0.0000  |
| 71                            | 7.9632 | 0.0000  |
| 72                            | 7.9636 | 0.0000  |
| 73                            | 8.0311 | 0.0000  |
| 74                            | 8.3795 | 0.0000  |
| 75                            | 8.5033 | 0.0000  |
| 76                            | 8.5120 | 0.0000  |
| 77                            | 8.5628 | 0.0000  |
| 78                            | 8.6727 | 0.0000  |
| 79                            | 8.7387 | 0.0000  |
| 80                            | 8.7426 | 0.0000  |
| 81                            | 8.7742 | 0.0000  |
| 82                            | 8.9077 | 0.0000  |
| 83                            | 8.9327 | 0.0000  |
| 84                            | 8.9377 | 0.0000  |
| 85                            | 9.1200 | 0.0000  |
| 86                            | 9.1363 | 0.0000  |
| 87                            | 9.1550 | 0.0000  |
| 88                            | 9.2015 | 0.0000  |
| 89                            | 9.2037 | 0.0000  |
| 90                            | 9.2052 | 0.0000  |
| 91                            | 9.2936 | 0.0000  |
| 92                            | 9.3931 | 0.0000  |
| 93                            | 9.4454 | 0.0000  |
| 94                            | 9.5483 | 0.0000  |
| 95                            | 9.6348 | 0.0000  |
| 96                            | 9.6994 | 0.0000  |
| 97                            | 9.7597 | 0.0000  |
| 98                            | 9.8769 | 0.0000  |
| 99                            | 9.8842 | 0.0000  |
| 100                           | 9.9142 | 0.0000  |
| <b>7'S*,7''S*,7'''S*,8'R*</b> |        |         |
| 1                             | 0.0000 | 56.0088 |
| 2                             | 0.2614 | 36.0319 |
| 3                             | 1.7922 | 2.7207  |
| 4                             | 2.1548 | 1.4753  |
| 5                             | 2.4012 | 0.9733  |
| 6                             | 2.4365 | 0.9171  |

|    |        |        |
|----|--------|--------|
| 7  | 2.5959 | 0.7007 |
| 8  | 3.0530 | 0.3240 |
| 9  | 3.2102 | 0.2485 |
| 10 | 3.5725 | 0.1348 |
| 11 | 3.7663 | 0.0972 |
| 12 | 3.9754 | 0.0683 |
| 13 | 4.0267 | 0.0626 |
| 14 | 4.0858 | 0.0567 |
| 15 | 4.3970 | 0.0335 |
| 16 | 4.5998 | 0.0238 |
| 17 | 4.7650 | 0.0180 |
| 18 | 4.9199 | 0.0139 |
| 19 | 4.9510 | 0.0132 |
| 20 | 5.1189 | 0.0099 |
| 21 | 5.1955 | 0.0087 |
| 22 | 5.2143 | 0.0084 |
| 23 | 5.4465 | 0.0057 |
| 24 | 5.5200 | 0.0050 |
| 25 | 5.5806 | 0.0045 |
| 26 | 5.6504 | 0.0040 |
| 27 | 5.6768 | 0.0039 |
| 28 | 5.7312 | 0.0035 |
| 29 | 5.7637 | 0.0033 |
| 30 | 5.7747 | 0.0033 |
| 31 | 5.7949 | 0.0032 |
| 32 | 5.9811 | 0.0023 |
| 33 | 6.1064 | 0.0019 |
| 34 | 6.4036 | 0.0011 |
| 35 | 6.4637 | 0.0010 |
| 36 | 6.5122 | 0.0009 |
| 37 | 6.7455 | 0.0006 |
| 38 | 6.8541 | 0.0005 |
| 39 | 6.9215 | 0.0005 |
| 40 | 6.9450 | 0.0005 |
| 41 | 6.9644 | 0.0004 |
| 42 | 6.9940 | 0.0004 |
| 43 | 7.0324 | 0.0004 |
| 44 | 7.0576 | 0.0004 |
| 45 | 7.0947 | 0.0004 |
| 46 | 7.1803 | 0.0003 |
| 47 | 7.1985 | 0.0003 |
| 48 | 7.2113 | 0.0003 |
| 49 | 7.2321 | 0.0003 |
| 50 | 7.2550 | 0.0003 |
| 51 | 7.3784 | 0.0002 |
| 52 | 7.5479 | 0.0002 |
| 53 | 7.6693 | 0.0001 |
| 54 | 8.1248 | 0.0001 |
| 55 | 8.1672 | 0.0001 |
| 56 | 8.2146 | 0.0001 |
| 57 | 8.2449 | 0.0001 |
| 58 | 8.3623 | 0.0000 |
| 59 | 8.3803 | 0.0000 |
| 60 | 8.5087 | 0.0000 |
| 61 | 8.5188 | 0.0000 |
| 62 | 8.5240 | 0.0000 |
| 63 | 8.6031 | 0.0000 |
| 64 | 8.6288 | 0.0000 |

|                             |        |         |
|-----------------------------|--------|---------|
| 65                          | 8.7202 | 0.0000  |
| 66                          | 8.9103 | 0.0000  |
| 67                          | 9.0109 | 0.0000  |
| 68                          | 9.0827 | 0.0000  |
| 69                          | 9.1258 | 0.0000  |
| 70                          | 9.1506 | 0.0000  |
| 71                          | 9.2411 | 0.0000  |
| 72                          | 9.2795 | 0.0000  |
| 73                          | 9.4952 | 0.0000  |
| 74                          | 9.5413 | 0.0000  |
| 75                          | 9.7095 | 0.0000  |
| 76                          | 9.7196 | 0.0000  |
| 77                          | 9.7741 | 0.0000  |
| 78                          | 9.7983 | 0.0000  |
| 79                          | 9.8566 | 0.0000  |
| 80                          | 9.8613 | 0.0000  |
| <b>7'S*,7'R*,7''S*,8'R*</b> |        |         |
| 1                           | 0.0000 | 64.3308 |
| 2                           | 0.9094 | 13.8639 |
| 3                           | 0.9644 | 12.6355 |
| 4                           | 1.7393 | 3.4164  |
| 5                           | 2.4308 | 1.0635  |
| 6                           | 2.5702 | 0.8406  |
| 7                           | 2.7034 | 0.6714  |
| 8                           | 2.9460 | 0.4458  |
| 9                           | 2.9685 | 0.4292  |
| 10                          | 3.1754 | 0.3027  |
| 11                          | 3.2117 | 0.2847  |
| 12                          | 3.2629 | 0.2611  |
| 13                          | 3.2630 | 0.2611  |
| 14                          | 3.3421 | 0.2285  |
| 15                          | 3.3566 | 0.2230  |
| 16                          | 3.6683 | 0.1317  |
| 17                          | 3.7594 | 0.1130  |
| 18                          | 3.8860 | 0.0912  |
| 19                          | 4.0840 | 0.0653  |
| 20                          | 4.2149 | 0.0524  |
| 21                          | 4.2903 | 0.0461  |
| 22                          | 4.3299 | 0.0431  |
| 23                          | 4.3570 | 0.0412  |
| 24                          | 4.4171 | 0.0372  |
| 25                          | 4.4822 | 0.0334  |
| 26                          | 5.1807 | 0.0103  |
| 27                          | 5.1991 | 0.0099  |
| 28                          | 5.2811 | 0.0087  |
| 29                          | 5.4376 | 0.0067  |
| 30                          | 5.5235 | 0.0058  |
| 31                          | 5.5872 | 0.0052  |
| 32                          | 5.6240 | 0.0049  |
| 33                          | 5.7164 | 0.0042  |
| 34                          | 5.7211 | 0.0041  |
| 35                          | 5.7646 | 0.0038  |
| 36                          | 5.7964 | 0.0036  |
| 37                          | 5.8313 | 0.0034  |
| 38                          | 5.9685 | 0.0027  |
| 39                          | 6.3097 | 0.0015  |
| 40                          | 6.3959 | 0.0013  |
| 41                          | 6.4290 | 0.0012  |

|    |        |        |
|----|--------|--------|
| 42 | 6.5043 | 0.0011 |
| 43 | 6.6171 | 0.0009 |
| 44 | 6.6307 | 0.0009 |
| 45 | 6.6495 | 0.0009 |
| 46 | 6.8270 | 0.0006 |
| 47 | 6.8736 | 0.0006 |
| 48 | 7.0394 | 0.0004 |
| 49 | 7.1326 | 0.0004 |
| 50 | 7.1758 | 0.0004 |
| 51 | 7.1788 | 0.0004 |
| 52 | 7.4115 | 0.0002 |
| 53 | 7.4502 | 0.0002 |
| 54 | 7.4569 | 0.0002 |
| 55 | 7.4781 | 0.0002 |
| 56 | 7.5029 | 0.0002 |
| 57 | 7.5170 | 0.0002 |
| 58 | 7.5430 | 0.0002 |
| 59 | 7.6001 | 0.0002 |
| 60 | 7.6111 | 0.0002 |
| 61 | 7.6305 | 0.0002 |
| 62 | 7.6903 | 0.0001 |
| 63 | 7.7841 | 0.0001 |
| 64 | 7.8527 | 0.0001 |
| 65 | 7.9054 | 0.0001 |
| 66 | 7.9282 | 0.0001 |
| 67 | 8.0711 | 0.0001 |
| 68 | 8.1066 | 0.0001 |
| 69 | 8.1156 | 0.0001 |
| 70 | 8.1639 | 0.0001 |
| 71 | 8.2136 | 0.0001 |
| 72 | 8.2169 | 0.0001 |
| 73 | 8.3008 | 0.0001 |
| 74 | 8.4011 | 0.0000 |
| 75 | 8.4253 | 0.0000 |
| 76 | 8.5681 | 0.0000 |
| 77 | 8.5939 | 0.0000 |
| 78 | 8.6055 | 0.0000 |
| 79 | 8.6981 | 0.0000 |
| 80 | 8.7472 | 0.0000 |
| 81 | 8.7772 | 0.0000 |
| 82 | 8.7919 | 0.0000 |
| 83 | 8.9574 | 0.0000 |
| 84 | 8.9646 | 0.0000 |
| 85 | 9.0368 | 0.0000 |
| 86 | 9.1555 | 0.0000 |
| 87 | 9.1973 | 0.0000 |
| 88 | 9.2466 | 0.0000 |
| 89 | 9.3435 | 0.0000 |
| 90 | 9.4750 | 0.0000 |
| 91 | 9.6051 | 0.0000 |
| 92 | 9.6169 | 0.0000 |
| 93 | 9.6331 | 0.0000 |
| 94 | 9.6886 | 0.0000 |
| 95 | 9.7468 | 0.0000 |
| 96 | 9.7896 | 0.0000 |
| 97 | 9.8717 | 0.0000 |
| 98 | 9.8973 | 0.0000 |
| 99 | 9.9292 | 0.0000 |

|                               |        |         |
|-------------------------------|--------|---------|
| 100                           | 9.9508 | 0.0000  |
| <b>7'S*,7''S*,7'''R*,8'R*</b> |        |         |
| 1                             | 0.0000 | 57.8901 |
| 2                             | 0.9767 | 11.1352 |
| 3                             | 1.0667 | 9.5671  |
| 4                             | 1.1819 | 7.8763  |
| 5                             | 1.2315 | 7.2443  |
| 6                             | 1.9992 | 1.9829  |
| 7                             | 2.3408 | 1.1141  |
| 8                             | 2.5656 | 0.7624  |
| 9                             | 2.7902 | 0.5218  |
| 10                            | 2.9697 | 0.3854  |
| 11                            | 3.0053 | 0.3629  |
| 12                            | 3.4159 | 0.1815  |
| 13                            | 3.4842 | 0.1617  |
| 14                            | 3.5163 | 0.1532  |
| 15                            | 3.5769 | 0.1383  |
| 16                            | 3.6983 | 0.1127  |
| 17                            | 3.7353 | 0.1059  |
| 18                            | 3.8656 | 0.0850  |
| 19                            | 4.2523 | 0.0442  |
| 20                            | 4.4831 | 0.0300  |
| 21                            | 4.5659 | 0.0261  |
| 22                            | 4.6265 | 0.0235  |
| 23                            | 4.7267 | 0.0199  |
| 24                            | 4.8916 | 0.0150  |
| 25                            | 5.2289 | 0.0085  |
| 26                            | 5.5190 | 0.0052  |
| 27                            | 5.5634 | 0.0048  |
| 28                            | 5.6094 | 0.0045  |
| 29                            | 5.6509 | 0.0042  |
| 30                            | 5.7216 | 0.0037  |
| 31                            | 5.7950 | 0.0033  |
| 32                            | 5.8390 | 0.0030  |
| 33                            | 5.8407 | 0.0030  |
| 34                            | 5.9290 | 0.0026  |
| 35                            | 5.9401 | 0.0026  |
| 36                            | 5.9962 | 0.0023  |
| 37                            | 6.0051 | 0.0023  |
| 38                            | 6.4700 | 0.0010  |
| 39                            | 6.4908 | 0.0010  |
| 40                            | 6.5136 | 0.0010  |
| 41                            | 6.5886 | 0.0009  |
| 42                            | 6.6839 | 0.0007  |
| 43                            | 6.8322 | 0.0006  |
| 44                            | 6.8809 | 0.0005  |
| 45                            | 6.8996 | 0.0005  |
| 46                            | 6.9425 | 0.0005  |
| 47                            | 7.0989 | 0.0004  |
| 48                            | 7.1627 | 0.0003  |
| 49                            | 7.1987 | 0.0003  |
| 50                            | 7.2185 | 0.0003  |
| 51                            | 7.2973 | 0.0003  |
| 52                            | 7.3556 | 0.0002  |
| 53                            | 7.4198 | 0.0002  |
| 54                            | 7.4930 | 0.0002  |
| 55                            | 7.4950 | 0.0002  |
| 56                            | 7.6026 | 0.0002  |

|    |        |        |
|----|--------|--------|
| 57 | 7.6716 | 0.0001 |
| 58 | 7.7197 | 0.0001 |
| 59 | 7.8214 | 0.0001 |
| 60 | 8.0874 | 0.0001 |
| 61 | 8.0932 | 0.0001 |
| 62 | 8.1500 | 0.0001 |
| 63 | 8.3858 | 0.0000 |
| 64 | 8.7093 | 0.0000 |
| 65 | 8.7144 | 0.0000 |
| 66 | 8.8055 | 0.0000 |
| 67 | 8.8058 | 0.0000 |
| 68 | 8.8721 | 0.0000 |
| 69 | 8.9009 | 0.0000 |
| 70 | 8.9061 | 0.0000 |
| 71 | 8.9288 | 0.0000 |
| 72 | 8.9609 | 0.0000 |
| 73 | 9.0619 | 0.0000 |
| 74 | 9.0775 | 0.0000 |
| 75 | 9.0848 | 0.0000 |
| 76 | 9.1418 | 0.0000 |
| 77 | 9.3026 | 0.0000 |
| 78 | 9.3843 | 0.0000 |
| 79 | 9.5775 | 0.0000 |
| 80 | 9.5917 | 0.0000 |
| 81 | 9.8066 | 0.0000 |
| 82 | 9.8473 | 0.0000 |
| 83 | 9.8604 | 0.0000 |
| 84 | 9.8795 | 0.0000 |
| 85 | 9.9233 | 0.0000 |
| 86 | 9.9261 | 0.0000 |
| 87 | 9.9705 | 0.0000 |
| 88 | 9.9786 | 0.0000 |
| 89 | 9.9795 | 0.0000 |
| 90 | 9.9829 | 0.0000 |

**Table S20.** Relative energy values (in kcal.mol<sup>-1</sup>) and Boltzmann population of the conformers obtained from the Monte Carlo/MMFF force field calculations for each stereoisomer considered for compound **5**.

| Conformers             | Relative energy values<br>(kcal.mol <sup>-1</sup> ) | Boltzmann population (%) |
|------------------------|-----------------------------------------------------|--------------------------|
| <i>7'S*,7''R*,8'R*</i> |                                                     |                          |
| 1                      | 0.0000                                              | 51.7000                  |
| 2                      | 0.4400                                              | 24.5000                  |
| 3                      | 1.0100                                              | 9.4000                   |
| 4                      | 1.4441                                              | 4.5177                   |
| 5                      | 1.7956                                              | 2.4962                   |
| 6                      | 1.8952                                              | 2.1097                   |
| 7                      | 2.2652                                              | 1.1300                   |
| 8                      | 2.5023                                              | 0.7573                   |
| 9                      | 2.5161                                              | 0.7399                   |
| 10                     | 2.6006                                              | 0.6415                   |
| 11                     | 2.6657                                              | 0.5748                   |
| 12                     | 3.0149                                              | 0.3189                   |
| 13                     | 3.1620                                              | 0.2487                   |
| 14                     | 3.2030                                              | 0.2321                   |
| 15                     | 3.3872                                              | 0.1701                   |
| 16                     | 3.7637                                              | 0.0901                   |
| 17                     | 3.8550                                              | 0.0772                   |
| 18                     | 3.8865                                              | 0.0732                   |
| 19                     | 4.2460                                              | 0.0399                   |
| 20                     | 4.2599                                              | 0.0390                   |
| 21                     | 4.2858                                              | 0.0373                   |
| 22                     | 4.3234                                              | 0.0350                   |
| 23                     | 4.5841                                              | 0.0226                   |
| 24                     | 4.8372                                              | 0.0147                   |
| 25                     | 4.9108                                              | 0.0130                   |
| 26                     | 4.9193                                              | 0.0128                   |
| 27                     | 4.9221                                              | 0.0128                   |
| 28                     | 4.9812                                              | 0.0115                   |
| 29                     | 5.0384                                              | 0.0105                   |
| 30                     | 5.0845                                              | 0.0097                   |
| 31                     | 5.1771                                              | 0.0083                   |
| 32                     | 5.1847                                              | 0.0082                   |
| 33                     | 5.3240                                              | 0.0065                   |
| 34                     | 5.3296                                              | 0.0064                   |
| 35                     | 5.4538                                              | 0.0052                   |
| 36                     | 5.5003                                              | 0.0048                   |
| 37                     | 5.8767                                              | 0.0025                   |
| 38                     | 5.9147                                              | 0.0024                   |
| 39                     | 6.0295                                              | 0.0020                   |
| 40                     | 6.0525                                              | 0.0019                   |
| 41                     | 6.1628                                              | 0.0016                   |
| 42                     | 6.2281                                              | 0.0014                   |
| 43                     | 6.3183                                              | 0.0012                   |
| 44                     | 6.4923                                              | 0.0009                   |
| 45                     | 6.5525                                              | 0.0008                   |
| 46                     | 6.6361                                              | 0.0007                   |
| 47                     | 6.6393                                              | 0.0007                   |
| 48                     | 6.6808                                              | 0.0007                   |
| 49                     | 6.7461                                              | 0.0006                   |

|                        |        |         |
|------------------------|--------|---------|
| 50                     | 6.7819 | 0.0006  |
| 51                     | 6.7989 | 0.0005  |
| 52                     | 6.8353 | 0.0005  |
| 53                     | 6.8577 | 0.0005  |
| 54                     | 6.9101 | 0.0004  |
| 55                     | 6.9671 | 0.0004  |
| 56                     | 7.0158 | 0.0004  |
| 57                     | 7.1100 | 0.0003  |
| 58                     | 7.2216 | 0.0003  |
| 59                     | 7.3088 | 0.0002  |
| 60                     | 7.3698 | 0.0002  |
| 61                     | 7.5946 | 0.0001  |
| 62                     | 7.6327 | 0.0001  |
| 63                     | 7.6717 | 0.0001  |
| 64                     | 7.7084 | 0.0001  |
| 65                     | 7.7729 | 0.0001  |
| 66                     | 8.0619 | 0.0001  |
| 67                     | 8.0874 | 0.0001  |
| 68                     | 8.1578 | 0.0001  |
| 69                     | 8.2122 | 0.0000  |
| 70                     | 8.2508 | 0.0000  |
| 71                     | 8.2653 | 0.0000  |
| 72                     | 8.3414 | 0.0000  |
| 73                     | 8.3846 | 0.0000  |
| 74                     | 8.3972 | 0.0000  |
| 75                     | 8.4325 | 0.0000  |
| 76                     | 8.4503 | 0.0000  |
| 77                     | 8.4770 | 0.0000  |
| 78                     | 8.6443 | 0.0000  |
| 79                     | 8.6901 | 0.0000  |
| 80                     | 8.6980 | 0.0000  |
| 81                     | 8.6992 | 0.0000  |
| 82                     | 8.7203 | 0.0000  |
| 83                     | 8.8273 | 0.0000  |
| 84                     | 8.9041 | 0.0000  |
| 85                     | 9.0070 | 0.0000  |
| 86                     | 9.0342 | 0.0000  |
| 87                     | 9.1554 | 0.0000  |
| 88                     | 9.1793 | 0.0000  |
| 89                     | 9.2959 | 0.0000  |
| 90                     | 9.3506 | 0.0000  |
| 91                     | 9.3724 | 0.0000  |
| 92                     | 9.4083 | 0.0000  |
| 93                     | 9.4176 | 0.0000  |
| 94                     | 9.4873 | 0.0000  |
| 95                     | 9.5743 | 0.0000  |
| 96                     | 9.6294 | 0.0000  |
| 97                     | 9.6934 | 0.0000  |
| 98                     | 9.8254 | 0.0000  |
| 99                     | 9.8608 | 0.0000  |
| 100                    | 9.9165 | 0.0000  |
| <b>7'S*,7''S*,8'R*</b> |        |         |
| 1                      | 0.0000 | 25.3914 |
| 2                      | 0.1490 | 19.7452 |
| 3                      | 0.3329 | 14.4765 |
| 4                      | 0.6771 | 8.0985  |
| 5                      | 0.9235 | 5.3436  |
| 6                      | 0.9785 | 4.8697  |



|    |        |        |
|----|--------|--------|
| 7  | 1.2449 | 3.1064 |
| 8  | 1.3005 | 2.8280 |
| 9  | 1.4830 | 2.0785 |
| 10 | 1.6045 | 1.6929 |
| 11 | 1.6115 | 1.6730 |
| 12 | 1.6601 | 1.5414 |
| 13 | 1.7253 | 1.3808 |
| 14 | 1.8126 | 1.1915 |
| 15 | 1.8733 | 1.0757 |
| 16 | 1.9674 | 0.9176 |
| 17 | 2.0426 | 0.8083 |
| 18 | 2.1373 | 0.6889 |
| 19 | 2.2582 | 0.5617 |
| 20 | 2.4768 | 0.3885 |
| 21 | 2.4811 | 0.3856 |
| 22 | 2.5751 | 0.3291 |
| 23 | 2.6042 | 0.3133 |
| 24 | 2.7118 | 0.2612 |
| 25 | 3.2046 | 0.1137 |
| 26 | 3.3556 | 0.0881 |
| 27 | 3.4066 | 0.0809 |
| 28 | 3.5774 | 0.0606 |
| 29 | 3.6280 | 0.0557 |
| 30 | 3.7681 | 0.0439 |
| 31 | 3.8684 | 0.0371 |
| 32 | 3.9034 | 0.0350 |
| 33 | 3.9081 | 0.0347 |
| 34 | 3.9391 | 0.0329 |
| 35 | 4.0815 | 0.0259 |
| 36 | 4.0818 | 0.0259 |
| 37 | 4.1263 | 0.0240 |
| 38 | 4.2032 | 0.0211 |
| 39 | 4.2056 | 0.0210 |
| 40 | 4.2793 | 0.0185 |
| 41 | 4.2871 | 0.0183 |
| 42 | 4.3805 | 0.0156 |
| 43 | 4.4862 | 0.0131 |
| 44 | 4.5280 | 0.0122 |
| 45 | 4.5424 | 0.0119 |
| 46 | 4.5538 | 0.0117 |
| 47 | 4.6212 | 0.0104 |
| 48 | 4.9883 | 0.0056 |
| 49 | 5.1727 | 0.0041 |
| 50 | 5.3095 | 0.0033 |
| 51 | 5.3838 | 0.0029 |
| 52 | 5.3993 | 0.0028 |
| 53 | 5.4604 | 0.0025 |
| 54 | 5.4629 | 0.0025 |
| 55 | 5.4718 | 0.0025 |
| 56 | 5.5877 | 0.0020 |
| 57 | 5.6744 | 0.0018 |
| 58 | 5.6938 | 0.0017 |
| 59 | 5.7442 | 0.0016 |
| 60 | 5.7977 | 0.0014 |
| 61 | 5.8084 | 0.0014 |
| 62 | 6.0730 | 0.0009 |
| 63 | 6.2302 | 0.0007 |
| 64 | 6.3006 | 0.0006 |

|     |        |        |
|-----|--------|--------|
| 65  | 6.3565 | 0.0006 |
| 66  | 6.6612 | 0.0003 |
| 67  | 6.9510 | 0.0002 |
| 68  | 6.9699 | 0.0002 |
| 69  | 7.2123 | 0.0001 |
| 70  | 7.2404 | 0.0001 |
| 71  | 7.2980 | 0.0001 |
| 72  | 7.3075 | 0.0001 |
| 73  | 7.6532 | 0.0001 |
| 74  | 7.7004 | 0.0001 |
| 75  | 7.7029 | 0.0001 |
| 76  | 7.7462 | 0.0001 |
| 77  | 7.7614 | 0.0001 |
| 78  | 7.7825 | 0.0001 |
| 79  | 7.9328 | 0.0000 |
| 80  | 7.9440 | 0.0000 |
| 81  | 8.0832 | 0.0000 |
| 82  | 8.1518 | 0.0000 |
| 83  | 8.4283 | 0.0000 |
| 84  | 8.4395 | 0.0000 |
| 85  | 8.4572 | 0.0000 |
| 86  | 8.4659 | 0.0000 |
| 87  | 8.5106 | 0.0000 |
| 88  | 8.6083 | 0.0000 |
| 89  | 8.7127 | 0.0000 |
| 90  | 9.1970 | 0.0000 |
| 91  | 9.3264 | 0.0000 |
| 92  | 9.3273 | 0.0000 |
| 93  | 9.3463 | 0.0000 |
| 94  | 9.3766 | 0.0000 |
| 95  | 9.5612 | 0.0000 |
| 96  | 9.5912 | 0.0000 |
| 97  | 9.6797 | 0.0000 |
| 98  | 9.8304 | 0.0000 |
| 99  | 9.8584 | 0.0000 |
| 100 | 9.9324 | 0.0000 |

**Table S21.** Relative energy values (in kcal.mol<sup>-1</sup>) and Boltzmann population of the conformers obtained from the Monte Carlo/MMFF force field calculations for each stereoisomer considered for compound **6**.

| Conformers | Relative energy values<br>(kcal.mol <sup>-1</sup> ) | Boltzmann population (%) |
|------------|-----------------------------------------------------|--------------------------|
| <i>7'R</i> |                                                     |                          |
| 1          | 0.0000                                              | 0.2690                   |
| 2          | 0.0538                                              | 0.2456                   |
| 3          | 0.4760                                              | 0.1205                   |
| 4          | 0.6309                                              | 0.0927                   |
| 5          | 0.8314                                              | 0.0661                   |
| 6          | 1.0000                                              | 0.0497                   |
| 7          | 1.5445                                              | 0.0198                   |
| 8          | 1.6442                                              | 0.0168                   |
| 9          | 1.6716                                              | 0.0160                   |
| 10         | 1.6992                                              | 0.0153                   |
| 11         | 1.7092                                              | 0.0150                   |
| 12         | 1.8463                                              | 0.0119                   |
| 13         | 1.8593                                              | 0.0117                   |
| 14         | 2.1331                                              | 0.0073                   |
| 15         | 2.1724                                              | 0.0069                   |
| 16         | 2.1846                                              | 0.0067                   |
| 17         | 2.3074                                              | 0.0055                   |
| 18         | 2.5704                                              | 0.0035                   |
| 19         | 2.5909                                              | 0.0034                   |
| 20         | 2.6865                                              | 0.0029                   |
| 21         | 3.0285                                              | 0.0016                   |
| 22         | 3.0893                                              | 0.0015                   |
| 23         | 3.2275                                              | 0.0012                   |
| 24         | 3.2496                                              | 0.0011                   |
| 25         | 3.2673                                              | 0.0011                   |
| 26         | 3.3606                                              | 0.0009                   |
| 27         | 3.4511                                              | 0.0008                   |
| 28         | 3.4982                                              | 0.0007                   |
| 29         | 3.5160                                              | 0.0007                   |
| 30         | 3.5471                                              | 0.0007                   |
| 31         | 3.6767                                              | 0.0005                   |
| 32         | 3.7859                                              | 0.0005                   |
| 33         | 4.0558                                              | 0.0003                   |
| 34         | 4.0778                                              | 0.0003                   |
| 35         | 4.3343                                              | 0.0002                   |
| 36         | 4.3717                                              | 0.0002                   |
| 37         | 4.4474                                              | 0.0001                   |
| 38         | 4.4744                                              | 0.0001                   |
| 39         | 4.5128                                              | 0.0001                   |
| 40         | 4.5472                                              | 0.0001                   |
| 41         | 4.5742                                              | 0.0001                   |
| 42         | 4.6828                                              | 0.0001                   |
| 43         | 4.7409                                              | 0.0001                   |
| 44         | 5.0291                                              | 0.0001                   |
| 45         | 5.0291                                              | 0.0001                   |
| 46         | 5.0293                                              | 0.0001                   |
| 47         | 5.0971                                              | 0.0000                   |
| 48         | 5.1490                                              | 0.0000                   |
| 49         | 5.1538                                              | 0.0000                   |

|     |        |        |
|-----|--------|--------|
| 50  | 5.4576 | 0.0000 |
| 51  | 5.5053 | 0.0000 |
| 52  | 5.5960 | 0.0000 |
| 53  | 5.7592 | 0.0000 |
| 54  | 5.7837 | 0.0000 |
| 55  | 5.8344 | 0.0000 |
| 56  | 6.0552 | 0.0000 |
| 57  | 6.1319 | 0.0000 |
| 58  | 6.1492 | 0.0000 |
| 59  | 6.3266 | 0.0000 |
| 60  | 6.4406 | 0.0000 |
| 61  | 6.4466 | 0.0000 |
| 62  | 6.4894 | 0.0000 |
| 63  | 6.5707 | 0.0000 |
| 64  | 6.7058 | 0.0000 |
| 65  | 6.8110 | 0.0000 |
| 66  | 6.9090 | 0.0000 |
| 67  | 7.1094 | 0.0000 |
| 68  | 7.2290 | 0.0000 |
| 69  | 7.3039 | 0.0000 |
| 70  | 7.3229 | 0.0000 |
| 71  | 7.3554 | 0.0000 |
| 72  | 7.4127 | 0.0000 |
| 73  | 7.4590 | 0.0000 |
| 74  | 7.5309 | 0.0000 |
| 75  | 7.6418 | 0.0000 |
| 76  | 7.7912 | 0.0000 |
| 77  | 7.8582 | 0.0000 |
| 78  | 7.9293 | 0.0000 |
| 79  | 7.9517 | 0.0000 |
| 80  | 8.0039 | 0.0000 |
| 81  | 8.0918 | 0.0000 |
| 82  | 8.1581 | 0.0000 |
| 83  | 8.1661 | 0.0000 |
| 84  | 8.2054 | 0.0000 |
| 85  | 8.2466 | 0.0000 |
| 86  | 8.2866 | 0.0000 |
| 87  | 8.3273 | 0.0000 |
| 88  | 8.3559 | 0.0000 |
| 89  | 8.5322 | 0.0000 |
| 90  | 8.6223 | 0.0000 |
| 91  | 8.7758 | 0.0000 |
| 92  | 8.8972 | 0.0000 |
| 93  | 9.2438 | 0.0000 |
| 94  | 9.4383 | 0.0000 |
| 95  | 9.6274 | 0.0000 |
| 96  | 9.6981 | 0.0000 |
| 97  | 9.7441 | 0.0000 |
| 98  | 9.7493 | 0.0000 |
| 99  | 9.8048 | 0.0000 |
| 100 | 9.9038 | 0.0000 |

**Table S22.** Boltzmann population of the conformers considered in the final simulated ECD spectra of compounds **1-6**.

| Conformers        | Boltzmann population (%) | Total population (%) |
|-------------------|--------------------------|----------------------|
| <b>Compound 1</b> |                          |                      |
| 1                 | 36.60                    | 100.00               |
| 2                 | 34.83                    |                      |
| 3                 | 27.80                    |                      |
| 4                 | 0.77                     |                      |
| <b>Compound 2</b> |                          |                      |
| 1                 | 52.35                    | 99.47                |
| 2                 | 28.93                    |                      |
| 3                 | 8.28                     |                      |
| 4                 | 7.22                     |                      |
| 5                 | 2.69                     |                      |
| <b>Compound 3</b> |                          |                      |
| 1                 | 50.15                    | 99.55                |
| 2                 | 28.46                    |                      |
| 3                 | 14.26                    |                      |
| 4                 | 4.90                     |                      |
| 5                 | 1.78                     |                      |
| <b>Compound 4</b> |                          |                      |
| 1                 | 29.29                    | 99.91                |
| 2                 | 19.25                    |                      |
| 3                 | 11.05                    |                      |
| 4                 | 10.68                    |                      |
| 5                 | 10.32                    |                      |
| 6                 | 9.17                     |                      |
| 7                 | 4.92                     |                      |
| 8                 | 3.38                     |                      |
| 9                 | 1.85                     |                      |
| <b>Compound 5</b> |                          |                      |
| 1                 | 51.42                    | 99.10                |
| 2                 | 16.91                    |                      |
| 3                 | 8.66                     |                      |
| 4                 | 4.47                     |                      |
| 5                 | 4.33                     |                      |
| 6                 | 1.70                     |                      |
| 7                 | 1.56                     |                      |
| 8                 | 1.54                     |                      |
| 9                 | 1.44                     |                      |
| 10                | 1.41                     |                      |
| 11                | 1.29                     |                      |
| 12                | 1.28                     |                      |
| 13                | 1.02                     |                      |
| 14                | 0.78                     |                      |
| 15                | 0.66                     |                      |
| 16                | 0.34                     |                      |
| 17                | 0.29                     |                      |
| <b>Compound 6</b> |                          |                      |
| 1                 | 9.21                     | 99.97                |
| 2                 | 7.38                     |                      |
| 3                 | 7.37                     |                      |
| 4                 | 7.36                     |                      |
| 5                 | 5.45                     |                      |
| 6                 | 5.27                     |                      |

|    |      |  |
|----|------|--|
| 7  | 5.26 |  |
| 8  | 4.78 |  |
| 9  | 4.58 |  |
| 10 | 4.56 |  |
| 11 | 3.79 |  |
| 12 | 3.73 |  |
| 13 | 3.35 |  |
| 14 | 3.33 |  |
| 15 | 3.05 |  |
| 16 | 2.72 |  |
| 17 | 2.45 |  |
| 18 | 2.43 |  |
| 19 | 2.40 |  |
| 20 | 2.24 |  |
| 21 | 2.17 |  |
| 22 | 1.96 |  |
| 23 | 1.81 |  |
| 24 | 1.37 |  |
| 25 | 1.34 |  |
| 26 | 0.16 |  |
| 27 | 0.15 |  |
| 28 | 0.11 |  |
| 29 | 0.10 |  |
| 30 | 0.09 |  |
